# Supplementary material
Source: publisher figshare collection journal article supplement (https://acs.figshare.com/ndownloader/files/4335799)

# Supporting Information

## Dihydropyranone Formation by *Ipso* C–H Activation in a Glucal 3-Carbamate-Derived Rhodium Acyl Nitrenoid

Brisa Hurlocker, Nadia C. Abascal, Lindsay M. Repka, Elsy Santizo-Deleon, Abigail L. Smenton,  
Victoria Baranov, Ritu Gupta, Sarah E. Bernard, Shenjuti Chowdhury, and Christian M. Rojas\*

*Department of Chemistry, Barnard College, 3009 Broadway, New York, New York 10027*

| <b><u>Contents</u></b>                                                                                             | <b><u>Pages</u></b> |
|--------------------------------------------------------------------------------------------------------------------|---------------------|
| <b>General experimental information</b>                                                                            | S3                  |
| <b>Part 1. Synthesis of compounds 7 for control experiments</b>                                                    | S4-S6               |
| 3- <i>O</i> - <i>tert</i> -Butyldimethylsilyl-4,6- <i>O</i> -di- <i>tert</i> -butylsilylene-D-glucal ( <b>7a</b> ) | S4                  |
| 3- <i>O</i> -Acetyl-4,6- <i>O</i> -di- <i>tert</i> -butylsilylene-D-glucal ( <b>7b</b> )                           | S4                  |
| 4,6- <i>O</i> -Di- <i>tert</i> -butylsilylene-3- <i>O</i> -( <i>N</i> -tosyl)carbamoyl-D-glucal ( <b>7c</b> )      | S5                  |
| 4,6- <i>O</i> -Di- <i>tert</i> -butylsilylene-3- <i>O</i> -( <i>N</i> -phenyl)carbamoyl-D-glucal ( <b>7d</b> )     | S5                  |
| 4,6- <i>O</i> -Isopropylidene-3- <i>O</i> -( <i>N</i> -phenyl)carbamoyl-D-allal ( <b>7e</b> )                      | S6                  |
| <b>Part 2. Experiments with compounds 1 and 7</b>                                                                  | S6-S9               |
| General Procedure                                                                                                  | S6                  |
| Product ratios in amidoglycosylation with primary carbamate <b>1</b>                                               | S7                  |
| Control experiment with <b>1</b> omitting the catalyst                                                             | S7                  |
| Control experiments with <b>1</b> and Lewis acid catalysts                                                         | S7                  |
| Control experiment with <b>6</b>                                                                                   | S8                  |
| Control experiments with <b>7a</b> and <b>7b</b>                                                                   | S8                  |
| Control experiments with <b>7c</b> and <b>7d</b>                                                                   | S8                  |
| Control experiment with <b>7e</b>                                                                                  | S9                  |
| <b>Part 3. Synthesis of <i>N</i>-tosyloxycarbamate 10 and glucal 3-azidoformate 11</b>                             | S9-11               |
| 4,6- <i>O</i> -Di- <i>tert</i> -butylsilylene-3- <i>O</i> -( <i>N</i> -hydroxy)carbamoyl-D-glucal ( <b>9</b> )     | S9                  |
| 4,6- <i>O</i> -Di- <i>tert</i> -butylsilylene-3- <i>O</i> -( <i>N</i> -tosyloxy)carbamoyl-D-glucal ( <b>10</b> )   | S10                 |
| 4,6- <i>O</i> -Di- <i>tert</i> -butylsilylene-3- <i>O</i> -carbonylazido-D-glucal ( <b>11</b> )                    | S10                 |
| <b>Part 4. Investigations with <i>N</i>-tosyloxycarbamate 10</b>                                                   | S11-13              |
| Reaction of <b>10</b> in the absence of alcohol with Rh <sub>2</sub> (OAc) <sub>4</sub> catalysis                  | S11                 |
| Reaction of <b>10</b> in the presence of 4-penten-1-ol with Rh <sub>2</sub> (OAc) <sub>4</sub> catalysis           | S12                 |
| Statistical comparison of results from iodine(III)-mediated reaction of <b>1</b> with reaction of <b>10</b>        | S12                 |
| Control experiments using <b>10</b> in the absence of rhodium or base                                              | S13                 |
| Reaction of <b>10</b> in the presence of 4-penten-1-ol with (CuOTf) <sub>2</sub> •PhH catalysis                    | S13                 |
| <b>Table of Contents continued on next page</b>                                                                    |                     |

|                                                                                                                                                                                                |        |
|------------------------------------------------------------------------------------------------------------------------------------------------------------------------------------------------|--------|
| <b><u>Contents (continued)</u></b>                                                                                                                                                             |        |
| <b>Part 5. Investigations with glucal 3-azidoformate 11</b>                                                                                                                                    | S13-14 |
| General photolysis procedure                                                                                                                                                                   | S13    |
| General thermolysis procedure                                                                                                                                                                  | S14    |
| Tabular summary of results for reactions of 11                                                                                                                                                 | S14    |
| <b>Part 6. Stability of dihydropyranone 3 under the reaction conditions</b>                                                                                                                    | S15    |
| Independent preparation of dihydropyranone 3                                                                                                                                                   | S15    |
| Control experiments with dihydropyranone 3                                                                                                                                                     | S15    |
| <b>Copies of <sup>1</sup>H and <sup>13</sup>C NMR spectra</b>                                                                                                                                  | S16-39 |
| 4,6- <i>O</i> -Di- <i>tert</i> -butylsilylene-3- <i>O</i> -carbamoyl-D-glucal ( <b>1</b> ). <sup>1</sup> H NMR                                                                                 | S16    |
| 4-Pentenyl 2-amino-2- <i>N</i> -3- <i>O</i> -carbonyl-2-deoxy-4,6- <i>O</i> -di- <i>tert</i> -butylsilylene- $\alpha$ -D-mannopyrano-side ( <b>2-<math>\alpha</math></b> ). <sup>1</sup> H NMR | S17    |
| 4-Pentenyl 2-amino-2- <i>N</i> -3- <i>O</i> -carbonyl-2-deoxy-4,6- <i>O</i> -di- <i>tert</i> -butylsilylene- $\beta$ -D-mannopyrano-side ( <b>2-<math>\beta</math></b> ). <sup>1</sup> H NMR   | S18    |
| 1,2-Dideoxy-4,6- <i>O</i> -di- <i>tert</i> -butylsilylene-D-erythro-hex-1-enopyran-3-ulose ( <b>3</b> ). <sup>1</sup> H NMR                                                                    | S19    |
| 3- <i>O</i> - <i>tert</i> -Butyldimethylsilyl-4,6- <i>O</i> -di- <i>tert</i> -butylsilylene-D-glucal ( <b>7a</b> ). <sup>1</sup> H and <sup>13</sup> C NMR                                     | S20-21 |
| 3- <i>O</i> -Acetyl-4,6- <i>O</i> -di- <i>tert</i> -butylsilylene-D-glucal ( <b>7b</b> ). <sup>1</sup> H and <sup>13</sup> C NMR                                                               | S22-23 |
| 4,6- <i>O</i> -Di- <i>tert</i> -butylsilylene-3- <i>O</i> -( <i>N</i> -tosyl)carbamoyl-D-glucal ( <b>7c</b> ). <sup>1</sup> H and <sup>13</sup> C NMR                                          | S24-25 |
| 4,6- <i>O</i> -Di- <i>tert</i> -butylsilylene-3- <i>O</i> -( <i>N</i> -phenyl)carbamoyl-D-glucal ( <b>7d</b> ). <sup>1</sup> H and <sup>13</sup> C NMR                                         | S26-27 |
| 4,6- <i>O</i> -Isopropylidene-3- <i>O</i> -( <i>N</i> -phenyl)carbamoyl-D-allal ( <b>7e</b> ). <sup>1</sup> H and <sup>13</sup> C NMR                                                          | S28-29 |
| 4,6- <i>O</i> -Di- <i>tert</i> -butylsilylene-3- <i>O</i> -( <i>N</i> -hydroxy)carbamoyl-D-glucal ( <b>9</b> ). <sup>1</sup> H and <sup>13</sup> C NMR                                         | S30-31 |
| 4,6- <i>O</i> -Di- <i>tert</i> -butylsilylene-3- <i>O</i> -( <i>N</i> -tosyloxy)carbamoyl-D-glucal ( <b>10</b> ). <sup>1</sup> H and <sup>13</sup> C NMR                                       | S32-33 |
| 4,6- <i>O</i> -Di- <i>tert</i> -butylsilylene-3- <i>O</i> -carbonylazido-D-glucal ( <b>11</b> )                                                                                                | S34-35 |
| 4,6- <i>O</i> -Di- <i>tert</i> -butylsilylene-3- <i>O</i> -carbonylimidazole-D-glucal ( <b>18</b> ). <sup>1</sup> H NMR                                                                        | S36    |
| <sup>1</sup> H NMR analysis (CDCl <sub>3</sub> ) of iodine(III)-mediated reaction of primary carbamate <b>1</b>                                                                                | S37    |
| <sup>1</sup> H NMR analysis (CDCl <sub>3</sub> ) of reaction of <b>10</b> in the absence of alcohol                                                                                            | S38    |
| <sup>1</sup> H NMR analysis (acetone- <i>d</i> <sub>6</sub> ) of reaction of <b>10</b> in the presence of 4-penten-1-ol                                                                        | S39    |

**General:** NMR spectra were recorded at 300 MHz for  $^1\text{H}$  spectra and 75 MHz for  $^{13}\text{C}$  spectra.  $^1\text{H}$  chemical shifts are reported in parts per million ( $\delta$ ) relative to tetramethylsilane (TMS,  $\delta$  0.00), using as a reference either added TMS or an appropriate signal for residual solvent protons.  $^{13}\text{C}$  NMR chemical shifts are reported in parts per million, using the center peak of the solvent signal as a reference (e.g.,  $\delta$  77.0 for  $\text{CDCl}_3$ ).  $^{13}\text{C}$  NMR peak multiplicities, where reported, were inferred using either DEPT 135 or edited HSQC experiments. The designation “o” (for odd number of attached hydrogens) denotes a CH or  $\text{CH}_3$  carbon. Where  $^1\text{H}$  and  $^{13}\text{C}$  NMR peak assignments are given, these were made unambiguously by a combination of  $^1\text{H}/^1\text{H}$  COSY and  $^1\text{H}/^{13}\text{C}$  HSQC experiments. Infrared spectra were recorded on an FT-IR spectrometer. Melting points were obtained using a capillary melting point apparatus and are uncorrected.

Iodosobenzene (PhIO) was prepared according to the literature procedure<sup>1</sup> and was stored at  $-20\text{ }^\circ\text{C}$  under dry argon or nitrogen. Oven-dried ( $135\text{ }^\circ\text{C}$ ) 4 Å molecular sieves were further activated by flame-drying under vacuum (0.5 mmHg) just prior to use. Methylene chloride was either distilled from  $\text{CaH}_2$  or used as received from Sigma-Aldrich (anhydrous, Sure Seal). Anhydrous dimethylformamide and tetrahydrofuran (Sure Seal) were purchased from Sigma-Aldrich and used as received. Other reagents were obtained commercially and were used as received. Reactions were carried out in oven- or flame-dried glassware under an atmosphere of dry nitrogen. The amidoglycosylation products were sometimes difficult to visualize on TLC. A useful system to char the TLC plates involved pre-warming the eluted TLC plate, dipping the plate in a solution of Coleman’s Permanganate [ $\text{KMnO}_4$  (3 g),  $\text{K}_2\text{CO}_3$  (20 g), 5% NaOH (5 mL),  $\text{H}_2\text{O}$  (300 mL)], and then gently heating the TLC plate.

We have reported spectroscopic data for **1**,<sup>5</sup> **2- $\alpha$** ,<sup>5</sup> **2- $\beta$** ,<sup>5</sup> **3**,<sup>5</sup> **14**,<sup>5b,6</sup> and **17**<sup>5,6a,7</sup> previously, and  $^1\text{H}$  NMR spectra of authentic samples of those materials were used for comparison in this study.

---

<sup>1</sup> Saltzman, H.; Sharefkin, J. G. In *Organic Syntheses*; Baumgarten, H. E., Ed.; John Wiley & Sons: New York, 1973; Coll. Vol. 5, pp 658–659.

## Experimental Procedures and Characterization Data

### Part 1. Synthesis of compounds **7** for control experiments

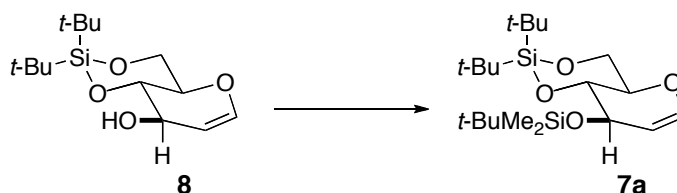

**3-*O*-tert-Butyldimethylsilyl-4,6-*O*-di-tert-butylsilylene-D-glucal (**7a**).** To a solution of di-*tert*-butylsilylene-protected D-glucal **8**<sup>2</sup> (101.3 mg, 0.354 mmol) in DMF (1.5 mL) was added imidazole (73.9 mg, 1.09 mmol), followed by *tert*-butyldimethylsilyl chloride (81.3 mg, 0.539 mmol). After stirring 4 h at 23 °C, the mixture was poured into satd aq NaHCO<sub>3</sub> (15 mL) and extracted with CH<sub>2</sub>Cl<sub>2</sub> (25 mL). The organic layer was further washed with satd aq NaHCO<sub>3</sub> (15 mL) and brine (15 mL), dried (MgSO<sub>4</sub>), filtered, and concentrated on the rotovap and then under high vacuum overnight to remove residual DMF. The crude material was chromatographed (4% EtOAc/hexanes, 50 mL SiO<sub>2</sub>), affording *tert*-butyldimethylsilyl ether **7a** (134.0 mg, 95%) as a clear, colorless oil.  $R_f$  = 0.73 (15% EtOAc/hexanes); IR (thin film) 1650 cm<sup>-1</sup>; <sup>1</sup>H NMR (300 MHz, CDCl<sub>3</sub>)  $\delta$  6.23 (dd,  $J$  = 6.0, 1.6 Hz, 1H), 4.60 (dd,  $J$  = 6.1, 1.9 Hz, 1H), 4.28 (ddd,  $J$  = 7.0, 1.8, 1.8 Hz, 1H), 4.16 (dd,  $J$  = 10.3, 4.9 Hz, 1H), 3.97 (dd,  $J$  = 10.3, 7.1 Hz, 1H), 3.95 (dd,  $J$  = 10.3, 10.3 Hz, 1H), 3.81 (ddd,  $J$  = 10.2, 10.2, 4.8 Hz, 1H), 1.06 (s, 9H), 1.00 (s, 9H), 0.92 (s, 9H), 0.13 (s, 3H), 0.12 (s, 3H); <sup>13</sup>C NMR (75 MHz, CDCl<sub>3</sub>)  $\delta$  142.9 (o), 105.1 (o), 77.06 (o),\* 72.8 (o), 70.7 (o), 66.0 (t), 27.5 (o), 27.0 (o), 25.8 (o), 22.8 (s), 19.8 (s), 18.2 (s), -4.4 (o), -4.7 (o); \*the <sup>13</sup>C NMR resonance at  $\delta$  77.06 was distinguished from the solvent peak by reprocessing the FID with lb = 0 and was also visible in the DEPT 135 spectrum; HRMS (FAB)  $m/z$  calcd for C<sub>20</sub>H<sub>39</sub>O<sub>4</sub>Si<sub>2</sub> (M-H)<sup>+</sup> 399.2387, found 399.2393.

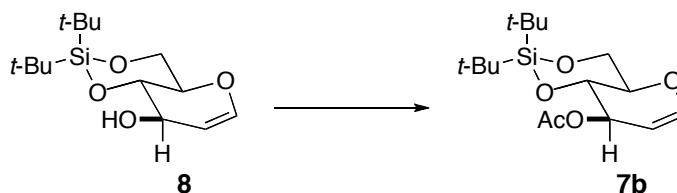

**3-*O*-Acetyl-4,6-*O*-di-tert-butylsilylene-D-glucal<sup>2</sup> (**7b**).** To a room-temperature solution of di-*tert*-butylsilylene-protected D-glucal **8**<sup>2</sup> (49.9 mg, 0.174 mmol) in CH<sub>2</sub>Cl<sub>2</sub> (3.0 mL) were added, sequentially, pyridine (56  $\mu$ L, 0.70 mmol), acetic anhydride (33  $\mu$ L, 0.35 mmol), and 4-(*N,N*-dimethylamino)pyridine (2.4 mg, 0.020 mmol). After 3 h, satd aq NaHCO<sub>3</sub> (20 mL) was added and the mixture was extracted with CH<sub>2</sub>Cl<sub>2</sub> (3 x 20 mL). The combined organic extracts were washed with satd aq CuSO<sub>4</sub> (15 mL), dried (MgSO<sub>4</sub>), filtered, and concentrated. Chromatography (8% EtOAc/hexanes, 15 mL SiO<sub>2</sub>) afforded acetate ester **7b** as a yellowish syrup (53.1 mg, 93%).  $R_f$  = 0.60 (20% EtOAc/hexanes); IR (thin film)

<sup>2</sup> Hoberg, J. O. *Carbohydr. Res.* **1997**, 300, 365–367.

1744, 1648  $\text{cm}^{-1}$ ;  $^1\text{H}$  NMR (300 MHz,  $\text{CDCl}_3$ )  $\delta$  6.32 (dd,  $J = 6.0, 1.6$  Hz, 1H), 5.38 (ddd,  $J = 7.6, 1.8, 1.8$  Hz, 1H), 4.73 (dd,  $J = 6.1, 2.1$  Hz, 1H), 4.19 (dd,  $J = 9.5, 4.3$  Hz, 1H), 4.15 (dd,  $J = 10.0, 7.5$  Hz, 1H), 3.99 (dd,  $J = 9.9, 9.9$  Hz, 1H), 3.91 (ddd,  $J = 10.0, 10.0, 4.4$  Hz, 1H), 2.11 (s, 3H), 1.06 (s, 9H), 0.99 (s, 9H);  $^{13}\text{C}$  NMR (75 MHz,  $\text{CDCl}_3$ )  $\delta$  171.0, 145.0, 100.6, 73.6, 72.9, 72.3, 65.7, 27.4, 26.8, 22.7, 21.2, 19.8; HRMS (FAB)  $m/z$  calcd for  $\text{C}_{16}\text{H}_{27}\text{O}_5\text{Si}$  ( $\text{M}-\text{H}$ ) $^+$  327.1628, found 327.1635.

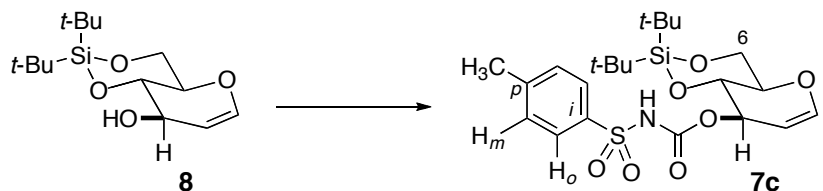

**4,6-O-Di-tert-butylsilylene-3-O-(N-tosyl)carbamoyl-D-glucal (7c).** A solution of 4,6-O-di-tert-butylsilylene-D-glucal **8**<sup>2</sup> (301.5 mg, 1.053 mmol) in  $\text{CH}_2\text{Cl}_2$  (1.0 mL) was cooled to 0  $^\circ\text{C}$ , followed by addition of *p*-toluenesulfonyl isocyanate (176  $\mu\text{L}$ , 1.16 mmol). The solution was stirred 10 min at 0  $^\circ\text{C}$  then 25 min at room temperature, diluted with  $\text{H}_2\text{O}$  (15 mL), and extracted with  $\text{CH}_2\text{Cl}_2$  (15 mL). The aqueous layer was further extracted with  $\text{CH}_2\text{Cl}_2$  (10 mL) and the combined organic layers were washed with  $\text{H}_2\text{O}$  (15 mL), dried ( $\text{Na}_2\text{SO}_4$ ), and concentrated to leave the crude as a white foamy oil. Column chromatography (20 $\rightarrow$ 25 $\rightarrow$ 30% EtOAc/hexanes, 175 mL  $\text{SiO}_2$ ) gave carbamate **7c** as an oil (313 mg, 61%).  $R_f = 0.57$  (40% EtOAc/hexanes); IR (thin film) 3240, 1757, 1646, 1598  $\text{cm}^{-1}$ ;  $^1\text{H}$  NMR (300 MHz,  $\text{CDCl}_3$ )  $\delta$  7.94 (apparent d,  $J = 8.4$  Hz, 2H,  $\text{H}_o$ ), 7.61 (br, 1H, NH), 7.32 (apparent d,  $J = 8.1$  Hz, 2H,  $\text{H}_m$ ), 6.29 (dd,  $J = 6.0, 1.5$  Hz, 1H,  $\text{H}_1$ ), 5.31 (ddd,  $J = 7.5, 1.8, 1.8$  Hz, 1H,  $\text{H}_3$ ), 4.66 (dd,  $J = 6.1, 2.0$  Hz, 1H,  $\text{H}_2$ ), 4.15 (dd,  $J = 9.6, 4.3$  Hz, 1H,  $\text{H}_{6\text{eq}}$ ), 4.03 (dd,  $J = 10.1, 7.6$  Hz, 1H,  $\text{H}_4$ ), 3.94 (dd,  $J = 9.9, 9.9$  Hz, 1H,  $\text{H}_{6\text{ax}}$ ), 3.85 (ddd,  $J = 10.1, 10.1, 4.4$  Hz, 1H,  $\text{H}_5$ ), 2.43 (s, 3H, Ar- $\text{CH}_3$ ), 0.97 (s, 9H,  $\text{SiC}(\text{CH}_3)_3$ ), 0.91 (s, 9H,  $\text{SiC}(\text{CH}_3)_3$ );  $^{13}\text{C}$  NMR (75 MHz,  $\text{CDCl}_3$ )  $\delta$  150.1 (s), 145.5 (o, C1), 145.0 (s), 135.5 (s), 129.6 (o,  $\text{C}_m$ ), 128.4 (o,  $\text{C}_o$ ), 99.5 (o, C2), 74.8 (o, C3), 73.5 (o, C4), 72.7 (o, C5), 65.5 (t, C6), 27.2 (o,  $\text{SiC}(\text{CH}_3)_3$ ), 26.7 (o,  $\text{SiC}(\text{CH}_3)_3$ ), 22.6 (s,  $\text{SiC}(\text{CH}_3)_3$ ), 21.7 (o, Ar- $\text{CH}_3$ ), 19.7 (s,  $\text{SiC}(\text{CH}_3)_3$ ); HRMS (FAB)  $m/z$  calcd for  $\text{C}_{22}\text{H}_{32}\text{NO}_7\text{Si}$  ( $\text{M}-\text{H}$ ) $^+$  482.1669, found 482.1690.

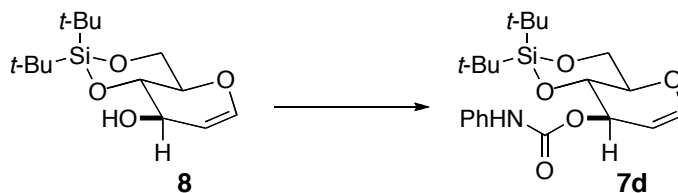

**4,6-O-Di-tert-butylsilylene-3-O-(N-phenyl)carbamoyl-D-glucal<sup>3</sup> (7d).** Glucal derivative **8**<sup>2</sup> (54.5 mg, 0.190 mmol) was dissolved in  $\text{CH}_2\text{Cl}_2$  (2.5 mL) at room temperature and phenyl isocyanate (23  $\mu\text{L}$ , 0.21 mmol) was added, followed by DBU (3.0  $\mu\text{L}$ , 0.019 mmol). After 2.5 h, brine (20 mL) was added and the mixture was extracted with  $\text{CH}_2\text{Cl}_2$  (3 x 10 mL). The combined organic extracts were dried

<sup>3</sup> (a) Nicolaou, K. C.; Baran, P. S.; Zhong, Y.-L.; Vega, J. A. *Angew. Chem. Int. Ed.* **2000**, 39, 2525–2529. (b) Nicolaou, K. C.; Baran, P. S.; Zhong, Y.-L.; Barluenga, S.; Hunt, K. W.; Kranich, R.; Vega, J. A. *J. Am. Chem. Soc.* **2002**, 124, 2233–2244.

(MgSO<sub>4</sub>), filtered, and concentrated. The crude material was chromatographed (10% EtOAc/hexanes, 15 mL SiO<sub>2</sub>), providing *N*-phenyl carbamate **7d** as a syrup (77.0 mg, quant). *R*<sub>f</sub> = 0.58 (30% EtOAc/hexanes); IR (thin film) 3327, 1724, 1647, 1602 cm<sup>-1</sup>; <sup>1</sup>H NMR (300 MHz, CDCl<sub>3</sub>) δ 7.48-7.20 (m, 4H), 7.07 (apparent t, *J* = 7.3 Hz, 1H), 6.75 (s, 1H), 6.33 (dd, *J* = 6.0, 1.2 Hz, 1H), 5.36 (ddd, *J* = 7.6, 1.6, 1.6 Hz, 1H), 4.87 (dd, *J* = 6.0, 1.8 Hz, 1H), 4.28-4.12 (m, 2H), 4.06-3.88 (m, 2H), 1.07 (s, 9H), 1.00 (s, 9H); there was evidence of a minor rotamer (~6%) from <sup>1</sup>H NMR signals just upfield of the signals at δ 6.33, 5.36, and 4.87; <sup>13</sup>C NMR (75 MHz, CDCl<sub>3</sub>) δ 153.3, 144.9, 137.8, 129.0, 123.5, 118.8, 100.9, 73.7, 73.4, 72.9, 65.7, 27.4, 26.9, 22.7, 19.8; the <sup>13</sup>C resonances at δ 118.8 and 73.4 were appreciably broadened; HRMS (FAB) *m/z* calcd for C<sub>21</sub>H<sub>32</sub>NO<sub>5</sub>Si (M+H)<sup>+</sup> 406.2050, found 406.2055.

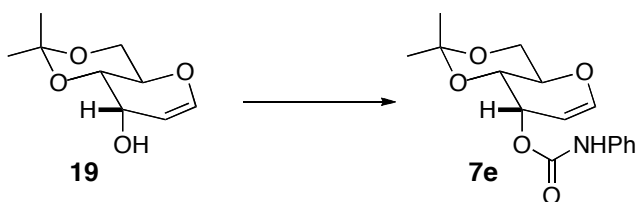

**4,6-*O*-Isopropylidene-3-*O*-(*N*-phenyl)carbamoyl-D-allal (**7e**).** To a room-temperature solution of isopropylidene-protected allal **19**<sup>4</sup> (101.2 mg, 0.544 mmol) in CH<sub>2</sub>Cl<sub>2</sub> (3.0 mL) was added DBU (24 μL, 0.16 mmol), followed by phenyl isocyanate (119 μL, 1.09 mmol). After 50 min, the reaction mixture was diluted with CH<sub>2</sub>Cl<sub>2</sub> and washed with satd aq NaHCO<sub>3</sub> (15 mL). The organic layer was dried (MgSO<sub>4</sub>), filtered, and concentrated. The residue was chromatographed (20→30→40% EtOAc/hexanes, 50 mL SiO<sub>2</sub>), affording *N*-phenyl carbamate **11e** as a white solid (118.5 mg, 71%). mp 144-146 °C, *R*<sub>f</sub> = 0.50 (40% EtOAc/hexanes); IR (thin film) 3379, 3334, 1729, 1711, 1631, 1601 cm<sup>-1</sup>; <sup>1</sup>H NMR (300 MHz, CDCl<sub>3</sub>) δ 7.43-7.23 (m, 4H), 7.15-6.90 (m, 2H), 6.46 (d, *J* = 6.0 Hz, 1H), 5.24 (dd, *J* = 5.8, 3.1 Hz, 1H), 5.08 (dd, *J* = 6.0, 6.0 Hz, 1H), 4.16-4.00 (m, 3H), 3.95-3.80 (m, 1H), 1.54 (s, 3H), 1.43 (s, 3H); <sup>13</sup>C NMR (75 MHz, CDCl<sub>3</sub>) δ 153.0, 147.2, 137.9, 128.9, 123.2, 118.6, 100.0, 98.8, 69.2, 65.7, 63.4, 61.8, 28.7, 18.9; HRMS (FAB) *m/z* calcd for C<sub>16</sub>H<sub>19</sub>NO<sub>5</sub> (M<sup>+</sup>) 305.1263, found 305.1266.

## Part 2. Experiments with compounds **1** and **7**

**General Procedure:** The glycal substrate (~50 mg), activated 4Å molecular sieves (300 wt % relative to the glycal), catalyst (0.1 equiv when included), and PhIO (1.8 equiv) were combined in a 10 mL round-bottom flask at room temperature. Introduction of 4-penten-1-ol (5.0 equiv) was followed immediately by addition of CH<sub>2</sub>Cl<sub>2</sub> (2.0 mL) and the mixture was well stirred for >3 h and in most cases for ~24 h (reactions of **1** under these conditions, with catalyst included, were complete in under 3 h). The reaction mixture was filtered through a plug of tightly packed Celite (2 cm x 2 cm in a medium porosity fritted glass filter funnel), rising with EtOAc (75 mL). The filtrate was concentrated on the rotovap and kept under high vacuum (~0.5 mmHg) overnight to remove excess 4-penten-1-ol. The

<sup>4</sup> Kan, C.; Long, C. M.; Paul, M.; Ring, C. M.; Tully, S. E.; Rojas, C. M. *Org. Lett.* **2001**, 3, 381-384.

crude was analyzed by  $^1\text{H}$  NMR, comparing with spectra of authentic samples of **2**,<sup>5</sup> **3**,<sup>5</sup> **14**,<sup>5b,6</sup> and **17**.<sup>5,6a,7</sup> Where appropriate, the crude material was chromatographed ( $\text{SiO}_2$ , EtOAc/hexanes) to isolate pure recovered starting material.

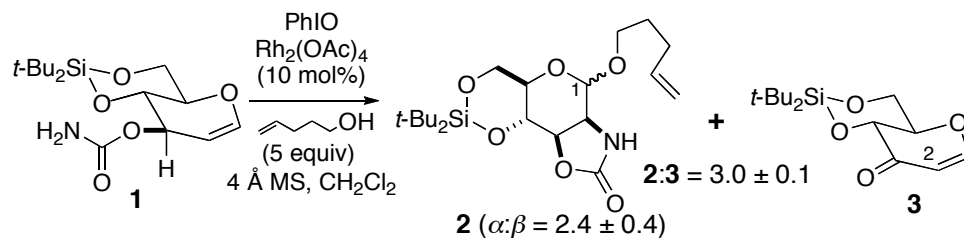

**Product ratios for amidoglycosylation with primary carbamate 1.** The amidoglycosylation shown above was conducted according to the general procedure given above and as described previously.<sup>5</sup> We have also reported spectroscopic data for the anomers of **2** and dihydropyranone **3**.<sup>5</sup> The ratios **2:3** and **2- $\alpha$ :2- $\beta$**  were determined by integration of the  $^1\text{H}$  NMR ( $\text{CDCl}_3$ ) signals for H1 of **2- $\alpha$**  and **2- $\beta$**  ( $\delta$  4.81 and  $\delta$  4.69, respectively) and H2 of **3** ( $\delta$  5.42). The ratios reported in the scheme above are the average of five separate runs  $\pm$  std dev.

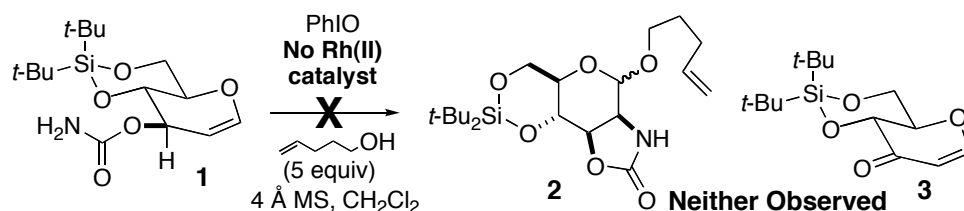

**Control experiment with 1 omitting the catalyst.** Reaction time: 18 h. Neither the amidoglycosylation product **2** nor the dihydropyranone **3** was observed when comparing the  $^1\text{H}$  NMR spectrum of the crude product to the spectra of authentic **2** (both anomers) and **3**. Remaining starting material **1** (86%) was evident by  $^1\text{H}$  NMR analysis of the crude material versus mesitylene as an internal standard.

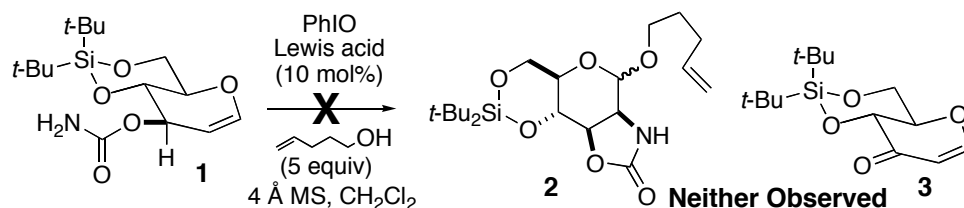

**Control experiments with 1 and Lewis acid catalysts.** Separate experiments were conducted using  $\text{Sm}(\text{OTf})_3$ ,  $\text{La}(\text{OTf})_3$ , and  $\text{Zn}(\text{OTf})_2$  as possible catalysts. Reaction time for each experiment: 17 h. In each case, neither the amidoglycosylation product **2** nor the dihydropyranone **3** was observed when

<sup>5</sup> (a) Bodner, R.; Marcellino, B. K.; Severino, A.; Smenton, A. L.; Rojas, C. M. *J. Org. Chem.* **2005**, *70*, 3988–3996. (b) Gupta, R.; Sogi, K. M.; Bernard, S. E.; Decatur, J. D.; Rojas, C. M. *Org. Lett.* **2009**, *11*, 1527–1530.

<sup>6</sup> (a) Fetizon, M.; Do Khac, D.; Nguyen Dinh, T. *Tetrahedron Lett.* **1986**, *27*, 1777–1780. (b) Czernecki, S.; Vijayakumaran, K.; Ville, G. *J. Org. Chem.* **1986**, *51*, 5472–5475. (c) Bouillot, A.; Do Khac, D.; Fétizon, M.; Guir, F.; Memoria, Y. *Synth. Commun.* **1993**, *23*, 2071–2081.

<sup>7</sup> Fraser-Reid, B.; Walker, D. L.; Tam S. Y.-K.; Holder, N. L. *Can. J. Chem.* **1973**, *51*, 3950–3954.

comparing the  $^1\text{H}$  NMR spectrum of the crude product to the spectra of authentic **2** (both anomers) and **3**. Remaining starting material **1** was evident by  $^1\text{H}$  NMR analysis of the crude material versus mesitylene as an internal standard [94% with  $\text{Sm}(\text{OTf})_3$ , 93% with  $\text{La}(\text{OTf})_3$ , and 92% with  $\text{Zn}(\text{OTf})_2$ ].

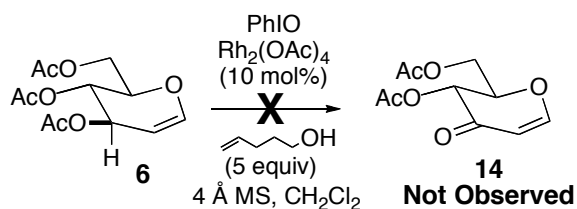

**Control experiment with 6.** Reaction time: 24 h. None of dihydropyranone **14**<sup>5b,6</sup> was observed when comparing the  $^1\text{H}$  NMR spectrum of the crude product to the spectrum of authentic **14**.<sup>5b</sup> Starting material **6** (87%) was recovered by chromatography (30% EtOAc/hexanes,  $\text{SiO}_2$ ).

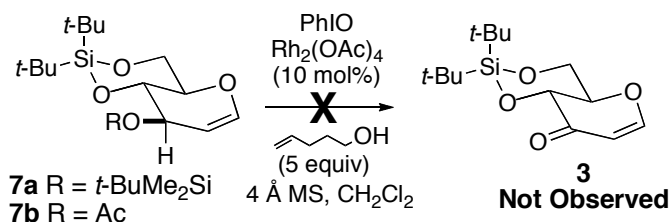

**Control experiments with 7a and 7b.** Reaction time with **7a**: 5 h. Reaction time with **7b**: 20 h. None of dihydropyranone **3** was observed in the  $^1\text{H}$  NMR spectrum of the crude product from either reaction; only the starting glycals were evident. Glucal **7a** (83%) was recovered by chromatography (5→10→15% EtOAc/hexanes,  $\text{SiO}_2$ ), while the amount of remaining **7b** was measured by  $^1\text{H}$  NMR (80% versus mesitylene as an internal standard).

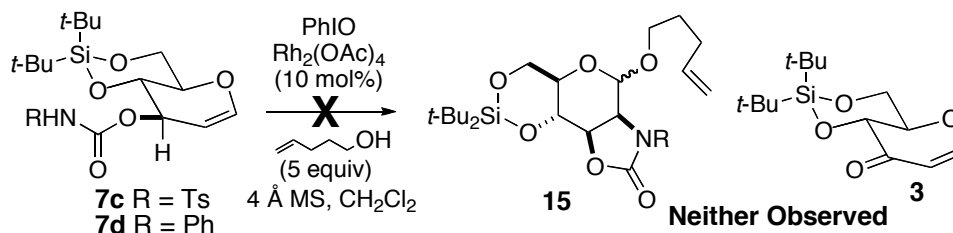

**Control experiments with 7c and 7d.** With **7c**, we conducted two experimental runs, one for 5 h and the other for 26 h. In neither case was **3** observed in the crude reaction mixture, nor did we detect signs of **15** (R = Ts). Recovered **7c** (71% after 5h and 61% after 26 h) was purified by chromatography (15→20→25% EtOAc/hexanes, 50 mL  $\text{SiO}_2$ ). With **7d**, the reaction time was 19 h, and dihydropyranone **3** was not formed, as judged by comparison of the  $^1\text{H}$  NMR spectrum of crude material with the spectrum of authentic **3**. Neither were signals attributable to oxidative cyclization products **15** (R = Ph) observed in the reaction with **7d**. Unreacted *N*-phenyl carbamate **7d** (70%) was recovered.



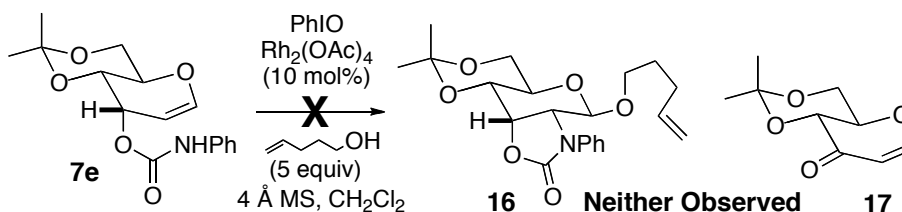

**Control experiment with 7e.** Reaction time: 26 h. None of dihydropyranone **17**<sup>5,6a,7</sup> was observed when comparing the <sup>1</sup>H NMR spectrum of the crude product to the spectrum of authentic **17**.<sup>5a</sup> Neither were signals attributable to amidoglycosylation product **16** observed. Starting material **7e** (94%) was recovered by chromatography (30→40% EtOAc/hexanes, SiO<sub>2</sub>).

### Part 3. Synthesis of *N*-tosyloxycarbamate **10** and glucal 3-azidoformate **11**

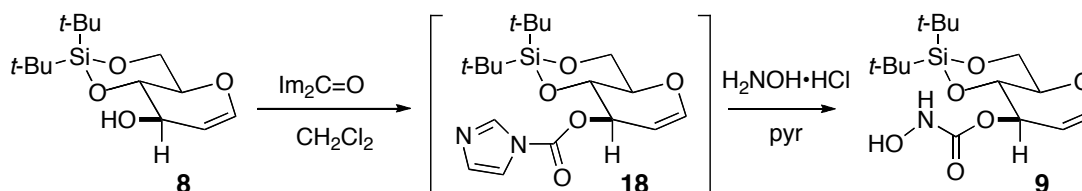

**4,6-*O*-Di-*tert*-butylsilylene-3-*O*-(*N*-hydroxy)carbamoyl-D-glucal (**9**).** To a solution of alcohol **8**<sup>2</sup> (0.5009 g, 1.75 mmol) in CH<sub>2</sub>Cl<sub>2</sub> (20 mL) was added 1,1'-carbonyl diimidazole (0.4252 g, 2.62 mmol). After 2 h at room temperature, the mixture was diluted with CH<sub>2</sub>Cl<sub>2</sub> (80 mL) and washed with satd aq NH<sub>4</sub>Cl (3 x 80 mL). The organic layer was dried (MgSO<sub>4</sub>), filtered, and concentrated, providing the carbonyl imidazole product **18** as a light yellow foam. Without further purification, *N*-acyl imidazole **18** (assumed 1.75 mmol) was dissolved in pyridine (4.0 mL) and hydroxylamine hydrochloride (0.3648 g, 5.25 mmol) was added. After stirring 60 h at room temperature, the reaction mixture was diluted with CH<sub>2</sub>Cl<sub>2</sub> (80 mL) and washed with water (2 x 80 mL) and brine (80 mL). The organic layer was dried (MgSO<sub>4</sub>), filtered, and concentrated. The crude product was chromatographed (30% EtOAc/hexanes, 100 mL SiO<sub>2</sub>), yielding hydroxycarbamate **9** as a white solid (0.4697 g, 78%). Data for hydroxycarbamate **9**: mp 110.0 °C; *R*<sub>f</sub> = 0.21 (30% EtOAc/hexanes); IR (thin film) 3315, 1731, 1649 cm<sup>-1</sup>; <sup>1</sup>H NMR (300 MHz, CDCl<sub>3</sub>) δ 7.44 (s, 1H), 6.92 (very br s, 1H), 6.33 (dd, *J* = 6.0, 1.5 Hz, 1H), 5.34 (ddd, *J* = 7.5, 1.8, 1.8 Hz, 1H), 4.80 (dd, *J* = 6.1, 2.1 Hz, 1H), 4.25-4.10 (m, 2H), 4.04-3.85 (m, 2H), 1.05 (s, 9H), 0.99 (s, 9H); <sup>13</sup>C NMR (75 MHz, CDCl<sub>3</sub>) δ 160.0 (s), 145.2 (o), 100.3 (o), 74.4 (o), 73.6 (o), 72.8 (o), 65.6 (t), 27.4 (o), 26.8 (o), 22.7 (s), 19.8 (s); HRMS (FAB) *m/z* calcd for C<sub>15</sub>H<sub>28</sub>NO<sub>6</sub>Si (M+H)<sup>+</sup> 346.1686, found 346.1688.

Data for intermediate *N*-acyl imidazole **18**: *R*<sub>f</sub> = 0.41 (30% EtOAc/hexanes); <sup>1</sup>H NMR (300 MHz, CDCl<sub>3</sub>) δ 8.17 (s, 1H), 7.45 (br s, 1H), 7.10 (m, 1H), 6.42 (dd, *J* = 6.0, 1.5 Hz, 1H), 5.56 (ddd, *J* = 7.5, 1.8, 1.8 Hz, 1H), 4.88 (dd, *J* = 6.1, 2.1 Hz, 1H), 4.37-4.19 (m, 2H), 4.09-3.93 (m, 2H), 1.05 (s, 9H), 1.00 (s, 9H).

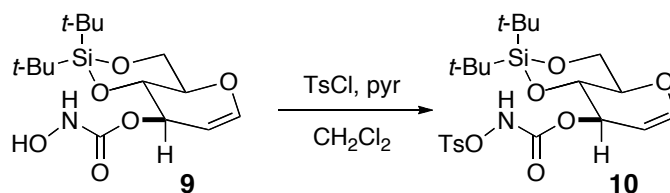

**4,6-*O*-Di-*tert*-butylsilylene-3-*O*-(*N*-tosyloxy)carbamoyl-D-glucal (**10**).** The *N*-hydroxycarbamate **9** (105.1 mg, 0.3042 mmol) was dissolved in CH<sub>2</sub>Cl<sub>2</sub> (1.5 mL) and pyridine (74  $\mu$ L, 0.915 mmol) was added, followed by *p*-toluenesulfonyl chloride (89.3 mg, 0.468 mmol). The solution was stirred at 25 °C during 4.5 h, diluted with CH<sub>2</sub>Cl<sub>2</sub> (25 mL), and washed with water (2 x 20 mL) and brine (1 x 20 mL). The organic layer was dried (MgSO<sub>4</sub>), filtered, and concentrated. The crude material was immediately chromatographed (20→25→30% EtOAc/Hexanes, 50 mL SiO<sub>2</sub>). Because **10** was prone to decomposition when kept neat for extended periods of time, the yield was determined by weight after concentration on the rotovap, followed by 5 min on the vacuum line. The resulting product **10**, a colorless foam (~120 mg, 80%), consequently contained traces of solvent, and the reported yield is an upper-limit estimate. After weighing, **10** was dissolved in CH<sub>2</sub>Cl<sub>2</sub> (1.0 mL) and used immediately. *R*<sub>f</sub> = 0.52 (30% EtOAc/hexanes); IR (thin film) 3281, 1775, 1736, 1647, 1597 cm<sup>-1</sup>; <sup>1</sup>H NMR (300 MHz, CD<sub>2</sub>Cl<sub>2</sub>)  $\delta$  8.20 (s, 1H), 7.86 (apparent d, *J* = 8.4 Hz, 2H), 7.37 (apparent d, *J* = 8.0 Hz, 2H), 6.31 (dd, *J* = 6.0, 1.4 Hz, 1H), 5.21 (ddd, *J* = 7.4, 1.8, 1.8 Hz, 1H), 4.53 (dd, *J* = 6.1, 2.0 Hz, 1H), 4.16 (dd, *J* = 9.6, 4.4 Hz, 1H), 4.03 (dd, *J* = 10.2, 7.4 Hz, 1H), 3.95 (dd, *J* = 9.9, 9.9 Hz, 1H), 3.87 (ddd, *J* = 10.1, 10.1, 4.5 Hz, 1H), 2.45 (s, 3H), 1.05 (s, 9H), 0.96 (s, 9H); <sup>13</sup>C NMR (75 MHz, CD<sub>2</sub>Cl<sub>2</sub>)  $\delta$  155.9 (s), 147.0 (s), 146.1 (o), 131.0 (s), 130.4 (o), 130.0 (o), 100.0 (o), 75.7 (o), 73.9 (o), 73.4 (o), 66.2 (t), 27.7 (o), 27.2 (o), 23.1 (s), 22.1 (o), 20.2 (s); HRMS (FAB) *m/z* calcd for C<sub>22</sub>H<sub>34</sub>NO<sub>8</sub>SiS (M+H)<sup>+</sup> 500.1774, found 500.1760.

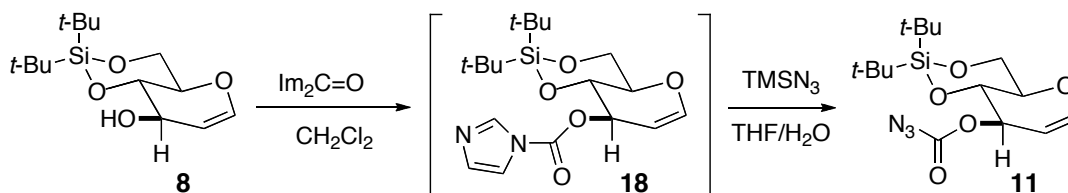

**4,6-*O*-Di-*tert*-butylsilylene-3-*O*-carbonylazido-D-glucal (**11**).** The *N*-acyl imidazole **18** was prepared from glucal **8** (529 mg, 1.85 mmol) as described above. After aqueous workup but without further purification, the intermediate **18** was dissolved in THF (5.0 mL) and TMSN<sub>3</sub> (1.0 mL, 7.5 mmol) was added. The solution was stirred at 25 °C during 69 h, at which point TLC indicated partial conversion to the upper *R*<sub>f</sub> product **11**, but considerable amounts of unreacted **18** still remained. As suggested by the work of Yoshimitsu and Tanaka,<sup>8</sup> H<sub>2</sub>O (500  $\mu$ L) was added and stirring continued at room temperature for 2 h. Remarkably, all the *N*-acyl imidazole **18** reacted within this period of time. The mixture was poured into satd aq NaHCO<sub>3</sub> (30 mL) and extracted with Et<sub>2</sub>O (50 mL). The organic layer was washed with satd aq NaHCO<sub>3</sub> (2 x 30 mL), dried (MgSO<sub>4</sub>), filtered, and concentrated. The crude material was

<sup>8</sup> Yoshimitsu, T.; Ino, T.; Futamura, N.; Kamon, T.; Tanaka, T. *Org. Lett.* **2009**, *11*, 3402–3405.

chromatographed (4% EtOAc/Hexanes, 125 mL SiO<sub>2</sub>), providing **11** as a clear, colorless oil (385 mg, 59% for the two steps from alcohol **8**). The azidoformate **11** exhibited signs of decomposition on SiO<sub>2</sub>-coated TLC plates (lower *R<sub>f</sub>* spots appeared), but showed clean NMR spectra and was stable to storage over at least several weeks.

**CAUTION: Azidoformates are potentially explosive. While we did not experience any problems with the preparation, storage, and use of **11**, proper precautions should be taken in handling this material.**<sup>9</sup>

Data for **11**: *R<sub>f</sub>* = 0.66 (30% EtOAc/hexanes); IR (thin film) 2180, 2140, 1755 (shoulder), 1733, 1648 cm<sup>-1</sup>; <sup>1</sup>H NMR (300 MHz, CDCl<sub>3</sub>) δ 6.36 (dd, *J* = 6.1, 1.5 Hz, 1H), 5.35 (ddd, *J* = 7.4, 1.8, 1.8 Hz, 1H), 4.78 (dd, *J* = 6.1, 2.1 Hz, 1H), 4.24–4.14 (m, 2H), 3.99 (dd, *J* = 9.9, 9.9 Hz, 1H), 3.91 (ddd, *J* = 10.1, 10.1, 4.4 Hz, 1H), 1.06 (s, 9H), 0.99 (s, 9H); <sup>13</sup>C NMR (75 MHz, CDCl<sub>3</sub>) δ 157.4 (s), 145.9 (o), 99.2 (o), 76.8 (o), 73.3 (o), 72.8 (o), 65.6 (t), 27.3 (o), 26.8 (o), 22.7 (s), 19.8 (s); HRMS (FAB) *m/z* calcd for C<sub>15</sub>H<sub>25</sub>N<sub>3</sub>O<sub>5</sub>Si (M<sup>+</sup>) 355.1563, found 355.1560.

#### Part 4. Investigations with *N*-tosyloxycarbamate **10**

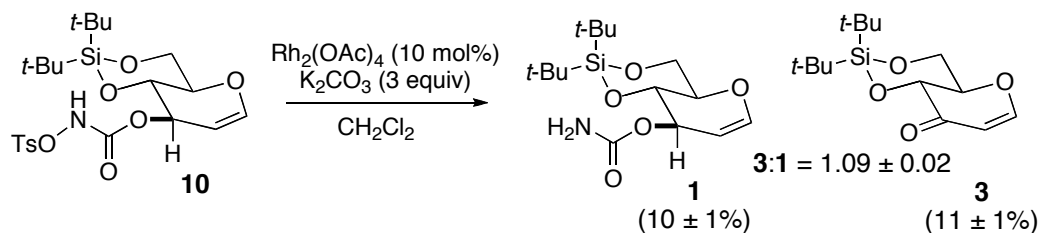

**Reaction of **10** in the absence of alcohol with Rh<sub>2</sub>(OAc)<sub>4</sub> catalysis.** Potassium carbonate (102.3 mg, 0.740 mmol) and Rh<sub>2</sub>(OAc)<sub>4</sub> (10.8 mg, 0.0244 mmol) were combined in a 10 mL round-bottom flask and a solution of freshly prepared *N*-tosyloxycarbamate **10** (~120 mg, 0.242 mmol) in CH<sub>2</sub>Cl<sub>2</sub> (1.0 mL) was added. The carbamate-containing pear-shaped flask was rinsed with CH<sub>2</sub>Cl<sub>2</sub> (2 x 1.0 mL) with the rinsings being added to the reaction mixture. The reaction mixture was initially green, becoming blue-grey and then purplish over a period of 1 h. The mixture was well stirred during 16.5 h then filtered through a tightly packed pad of Celite, rising with EtOAc (80 mL). The filtrate was concentrated and the crude material analyzed by <sup>1</sup>H NMR (CDCl<sub>3</sub>), which identified dihydropyranone **3** and carbamate **1** by comparison with <sup>1</sup>H NMR spectra of authentic samples. The 3:1 ratio was determined by integration of the H3 signal for **1** (δ 5.27) and the H2 signal of **3** (δ 5.42). The ratio reported in the scheme above is the average of three separate runs ± std dev. NMR yields of **1** and **3** were determined by including mesitylene as an internal standard; here, too, the reported values are the average of three separate runs ± std dev.

<sup>9</sup> For a report on the violent decomposition of *tert*-butylazidoformate (BocN<sub>3</sub>) during distillation, see: Feyen, P. *Angew. Chem., Int. Ed. Engl.* **1977**, *16*, 115.

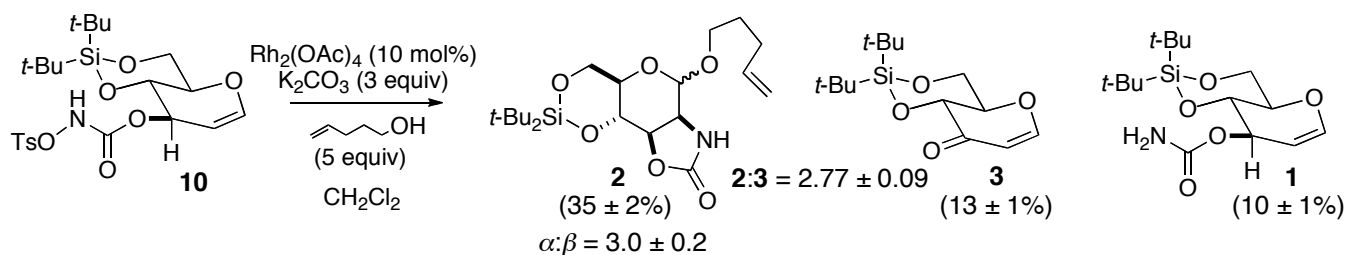

**Reaction of 10 in the presence of 4-penten-1-ol with  $\text{Rh}_2(\text{OAc})_4$  catalysis.** Potassium carbonate (95.8 mg, 0.693 mmol) and  $\text{Rh}_2(\text{OAc})_4$  (11.1 mg, 0.0251 mmol) were combined in a 10 mL round-bottom flask and 4-penten-1-ol (125  $\mu\text{L}$ , 1.23 mmol) was added, followed immediately by a solution of freshly prepared *N*-tosyloxycarbamate **10** (~114 mg, 0.228 mmol) in  $\text{CH}_2\text{Cl}_2$  (1.0 mL). The carbamate-containing pear-shaped flask was rinsed with  $\text{CH}_2\text{Cl}_2$  (2 x 1.0 mL) with the rinsings being added to the reaction mixture. The well stirred mixture turned from a blue-green-grey to a purple color within 20–30 min. Stirring was continued 16 h and the purple mixture was filtered through a tightly packed pad of Celite, rising with EtOAc (80 mL). The filtrate was concentrated (rotovap  $\rightarrow$  vacuum line to remove excess 4-penten-1-ol) and the crude material analyzed by  $^1\text{H}$  NMR (separately in  $\text{CDCl}_3$  and acetone- $d_6$ ), comparing to authentic samples of **1**, **2**, and **3**. The **2:3** and **2- $\alpha$ :2- $\beta$**  ratios were best measured in acetone- $d_6$  from the resonances for H3 of **2- $\alpha$**  ( $\delta$  4.56), H1 of **2- $\beta$**  ( $\delta$  4.86), and H2 of **3** ( $\delta$  5.33). The ratios reported in the scheme above are the average of three separate runs  $\pm$  std dev. The yields were determined by  $^1\text{H}$  NMR analysis of the crude in  $\text{CDCl}_3$  using the H1 signals for **2- $\alpha$**  and **2- $\beta$**  ( $\delta$  4.81 and  $\delta$  4.69, respectively), the H2 signal for **3** ( $\delta$  5.42), and the H3 signal for **1** ( $\delta$  5.27) versus mesitylene added as an internal standard. The reported values are the average of three experiments  $\pm$  std dev.

**Statistical comparison of results from iodine(III) mediated amidoglycosylation of 1 with results from amidoglycosylation of 10 using  $\text{Rh}_2(\text{OAc})_4$  catalysis).** The mean values of the **2- $\alpha$ :2- $\beta$**  ratio were compared using a Student's t-test. The t-value (6 degrees of freedom) = 2.380, and the p-value = 0.054,<sup>10</sup> indicating a near-95% confidence level that the difference between the means was statistically significant. The mean values of the **2:3** ratio were also compared. For this comparison, the t-value (6 degrees of freedom) = 3.614, and the p-value = 0.011, indicating a greater than 98% confidence level that the difference between the means was statistically significant. We attribute these small but nevertheless statistically significant differences in the product ratios to the impact of the different reaction conditions (4 Å molecular sieves in the iodine(III)-mediated reactions of **1** versus  $\text{K}_2\text{CO}_3$  in reactions of **10**) on trapping of the glycosyl aziridine or oxocarbenium ion formed upon nitrenoid insertion into the glucal C=C.

<sup>10</sup> P-values were calculated using a two-tail, equal variance t-test, as implemented in Microsoft Excel 2008 for Macintosh.

**Control experiments using 10 in the absence of rhodium or base.** Following the same procedures outlined above, the control experiments were conducted as shown in the table below. The crude reaction mixtures were analyzed by  $^1\text{H}$  NMR and TLC, comparing with authentic samples of **1**, **2**, and **3**:<sup>11</sup>

| Entry | 4-penten-1-ol | $\text{Rh}_2(\text{OAc})_4$ | $\text{K}_2\text{CO}_3$ | <b>1</b> observed? | <b>2</b> observed? | <b>3</b> observed? |
|-------|---------------|-----------------------------|-------------------------|--------------------|--------------------|--------------------|
| 1     | —             | —                           | +                       | no                 | N/A                | no                 |
| 2     | +             | —                           | +                       | no                 | no                 | no                 |
| 3     | +             | +                           | —                       | no                 | no                 | no                 |

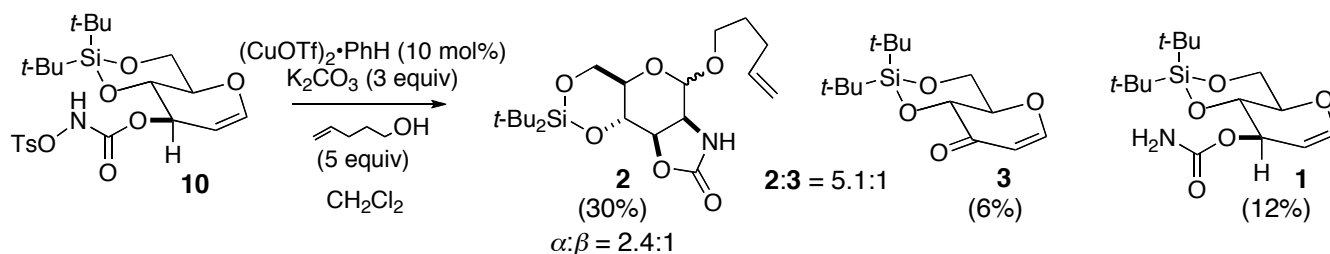

**Reaction of 10 in the presence of 4-penten-1-ol with  $(\text{CuOTf})_2 \cdot \text{PhH}$  catalysis.** Potassium carbonate (94.7 mg, 0.685 mmol) and  $(\text{CuOTf})_2 \cdot \text{PhH}$  (11.3 mg, 0.0225 mmol) were combined in a 10 mL round-bottom flask and 4-penten-1-ol (120  $\mu\text{L}$ , 1.18 mmol) was added, followed immediately by a solution of freshly prepared *N*-tosyloxycarbamate **10** (~114 mg, 0.228 mmol) in  $\text{CH}_2\text{Cl}_2$  (1.5 mL). The carbamate-containing pear-shaped flask was rinsed with  $\text{CH}_2\text{Cl}_2$  (2 x 1.0 mL) and the rinsings were added to the reaction mixture. The mixture was stirred 18 h at room temperature and filtered through a tightly packed pad of Celite, rising with  $\text{CH}_2\text{Cl}_2$  (75 mL). The filtrate was concentrated (rotovap  $\rightarrow$  vacuum line to remove excess 4-penten-1-ol) and the crude material analyzed by  $^1\text{H}$  NMR (separately in  $\text{CDCl}_3$  and acetone- $d_6$ ), comparing to authentic samples of **1**, **2**, and **3** as described above for the rhodium(II)-catalyzed reaction, except that yields were determined versus mesitylene in acetone- $d_6$  instead of in  $\text{CDCl}_3$ .

## Part 5. Investigations with glucal 3-azidoformate **11**

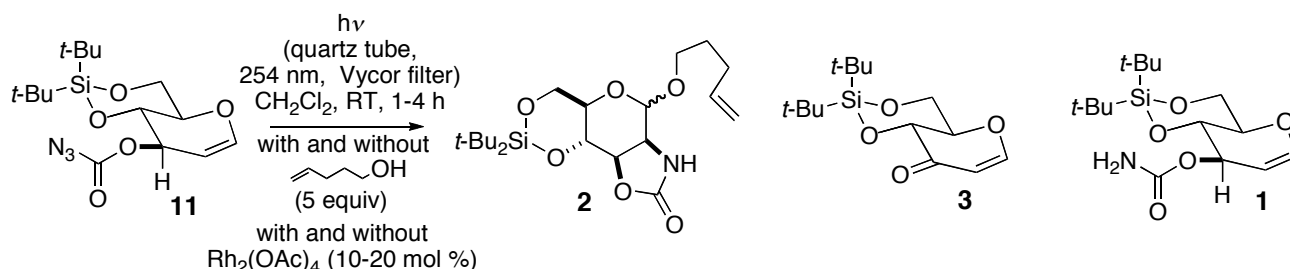

**General photolysis procedure.** A solution of azidoformate **11** (~22 mg, 0.062 mmol) in  $\text{CH}_2\text{Cl}_2$  (4–10 mL) in a quartz reaction tube was irradiated during 1–4 h with a low-pressure 254 nm lamp through a

<sup>11</sup> Because the crude reaction products in the control experiments consisted of complex mixtures, we cannot completely rule out formation of the merest traces of **1**, **2**, or **3**.

Vycor filter in a Rayonet merry-go-round apparatus. The solution was concentrated and the crude reaction mixture analyzed by  $^1\text{H}$  NMR in both  $\text{CDCl}_3$  and acetone- $d_6$ , using diagnostic resonances as described above in the *N*-tosyloxycarbamate reactions. Yields were determined by  $^1\text{H}$  NMR versus mesitylene as an internal standard, either in acetone- $d_6$  or  $\text{CDCl}_3$ . Photolysis experiments were also conducted with added 4-penten-1-ol and  $\text{Rh}_2(\text{OAc})_4$  as summarized in the table below. In photochemical reactions run for varying lengths of time and to varying amounts of starting material consumption, we did not in any case detect formation of dihydropyranone **3**. The dihydropyranone is photo-labile to an appreciable extent (see the description of control experiments on the following page), but we expect that if **3** had formed in the photochemical reactions of **11**, we would have detected at least some of it.

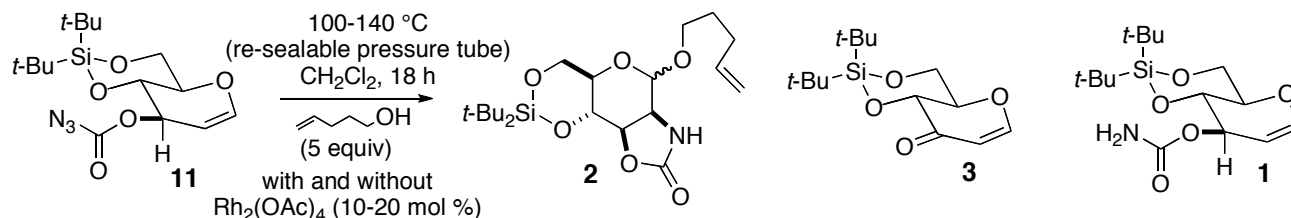

**General thermolysis procedure.** A solution of azidoformate **11** (~20 mg, 0.056 mmol) and 4-penten-1-ol (~29  $\mu\text{L}$ , 0.285 mmol) in  $\text{CH}_2\text{Cl}_2$  (4–6 mL) was heated in a thick-walled re-sealable pressure tube at ~100  $^\circ\text{C}$ –140  $^\circ\text{C}$ ) as summarized in the table below. Thermolysis was also conducted in the presence of  $\text{Rh}_2(\text{OAc})_4$ . The reaction mixture was concentrated and analyzed by  $^1\text{H}$  NMR as described above. Below 90  $^\circ\text{C}$ , the azidoformate **11** did not undergo appreciable thermal reaction either in the absence or presence of  $\text{Rh}_2(\text{OAc})_4$  over periods of 2–15 h.

#### Tabular summary of results for reactions of **11**.

| $h\nu$ | $\Delta$                                                                                                    |   | $\text{Rh}_2(\text{OAc})_4$ | % <b>2</b> ( $\alpha:\beta$ )    | % <b>3</b> | % <b>1</b>                       |
|--------|-------------------------------------------------------------------------------------------------------------|---|-----------------------------|----------------------------------|------------|----------------------------------|
| 1 h    |                                                                                                             |   |                             | N/A                              | None       | Formed but yield nd <sup>a</sup> |
| 1 h    |                                                                                                             | + |                             | 44 (1.5:1)                       | None       | -b-                              |
| 1.5 h  |                                                                                                             | + | +                           | 20 (2.4)                         | None       | -b-                              |
| 4 h    |                                                                                                             | + | +                           | 34 (2.5)                         | None       | -b-                              |
|        | 110 $^\circ\text{C}$ , 1 h $\rightarrow$ 140 $^\circ\text{C}$ 1 h                                           | + |                             | Formed but yield nd <sup>a</sup> | None       | -b-                              |
|        | 110 $^\circ\text{C}$ , 18 h                                                                                 | + |                             | 2 of $\beta$ (nd <sup>a</sup> )  | None       | None                             |
|        | 23 $^\circ\text{C}$ , 15 h $\rightarrow$ 55 $^\circ\text{C}$ , 2 h $\rightarrow$ 90 $^\circ\text{C}$ , 17 h | + | +                           | 8 (3.0)                          | 2          | 5                                |

<sup>a</sup>nd = not determined. <sup>b</sup>Not detected, but regions in  $^1\text{H}$  NMR spectra of the crude reaction mixture that would have contained resonances for **1** were obscured by other signals.

## Part 6. Stability of dihydropyranone **3** under the reaction conditions

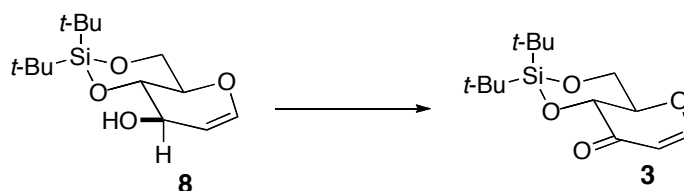

**Independent preparation of dihydropyranone **3**.** To a solution of alcohol **12** (100.6 mg, 3.54 mmol) in  $\text{CH}_2\text{Cl}_2$  (2.0 mL) was added pyridinium dichromate (199.9 mg, 5.44 mmol) and the solution was stirred 4 h at room temperature. Additional PDC (91.6 mg, 2.49 mmol) was added and the solution stirred overnight. The reaction mixture was diluted with  $\text{Et}_2\text{O}$  (10 mL) and filtered through Celite. The solution was dried ( $\text{MgSO}_4$ ), filtered, and concentrated. Chromatography (25%  $\text{EtOAc}$ /hexanes, 50 mL  $\text{SiO}_2$ ) yielded dihydropyranone **3** as a white solid (55.1 mg, 55%). The identity of this material with that prepared in our previous studies was confirmed by  $^1\text{H}$  NMR analysis.

**Control experiments with dihydropyranone **3**.** To a solution of dihydropyranone **3** (35.6 mg, 0.125 mmol) in  $\text{CD}_2\text{Cl}_2$  (1.00 mL) was added 4-penten-1-ol (64  $\mu\text{L}$ , 0.63 mmol), followed immediately by  $\text{K}_2\text{CO}_3$  (52.6 mg, 0.380 mmol) and  $\text{Rh}_2(\text{OAc})_4$  (6.0 mg, 0.14 mmol). The mixture was stirred at room temperature, and aliquots (100  $\mu\text{L}$ ) were taken after 15 min, 1 h, and 18 h. The aliquots were mixed with a stock solution of mesitylene in  $\text{CD}_2\text{Cl}_2$  (500  $\mu\text{L}$  of a 0.0250 M solution, 0.0125 mmol mesitylene), and the resulting solution was analyzed by  $^1\text{H}$  NMR. No decomposition of the dihydropyranone was noted after 18 h as measured against the mesitylene internal standard.

In a separate experiment, the same procedure was followed, but in the absence of 4-penten-1-ol. Again, no decomposition of the dihydropyranone was noted.

To assess the stability of dihydropyranone **3** under the conditions used for photolysis reactions of **11**, a solution of **3** (22 mg, 0.0773 mmol) in  $\text{CH}_2\text{Cl}_2$  (10 mL) in a quartz reaction tube was irradiated (254 nm low-pressure lamp, Vycor filter, Rayonet merry-go-round apparatus) during 1 h. The solution was concentrated and analyzed by  $^1\text{H}$  NMR. While no identifiable byproducts were observed, the amount of remaining **3** was 42% versus mesitylene added as an internal standard. When the photochemical control was repeated in the presence of added 4-penten-1-ol (5 equiv), 34% of the original **3** remained after 1 h photolysis.

## Current Data Parameters

NAME I-AS-3  
EXPNO 1  
PROCNO 1

## F2 - Acquisition Parameters

Date\_ 20071221  
Time 15.52  
INSTRUM spect  
PROBHD 5 mm BBO BB-1H  
PULPROG zg30  
TD 65536  
SOLVENT CDCl3  
NS 16  
DS 2  
SWH 6172.839 Hz  
FIDRES 0.094190 Hz  
AQ 5.3084660 sec  
RG 128  
DW 81.000 usec  
DE 6.00 usec  
TE 293.8 K  
D1 1.00000000 sec  
TD0 1

## ===== CHANNEL f1 =====

NUC1 1H  
P1 6.65 usec  
PL1 3.00 dB  
SFO1 300.1318534 MHz

## F2 - Processing parameters

SI 32768  
SF 300.1300027 MHz  
WDW EM  
SSB 0  
LB 0.30 Hz  
GB 0  
PC 1.00

I-AS-3  
Di-t-butyl silylene-protected carbamate  
By CMR on 12/21/2007

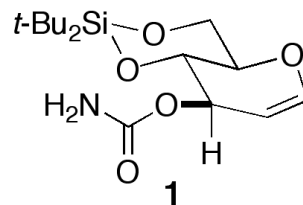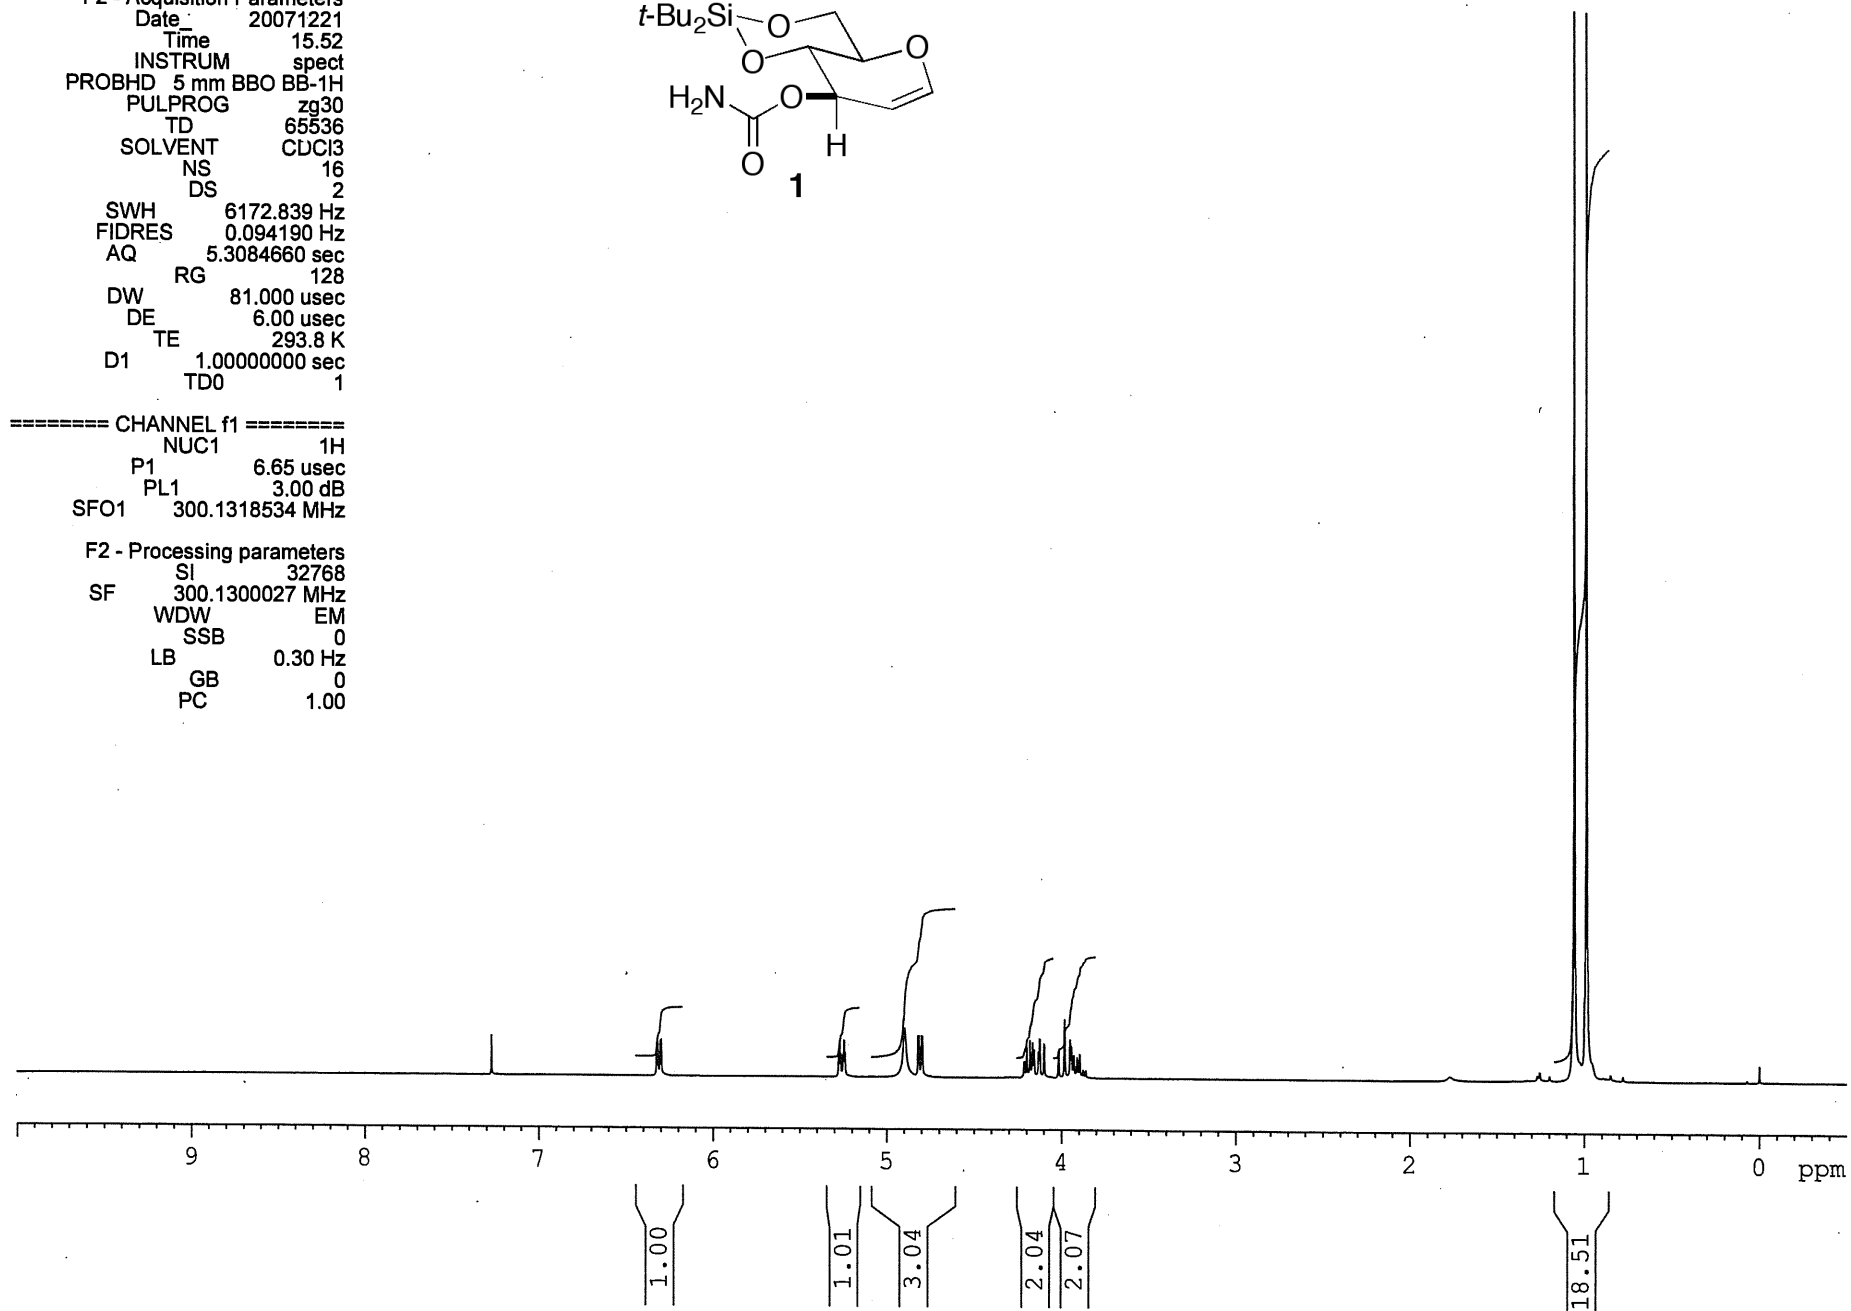



Current Data Parameters  
NAME II-CMR-255  
EXPNO 2  
PROCNO 1

II-CMR-255-F17-21

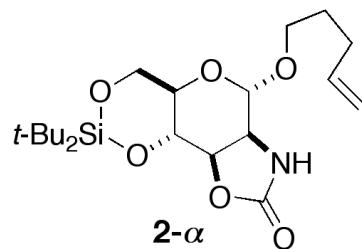

F2 - Acquisition Parameters  
Date\_ 20030414  
Time 11.57  
INSTRUM spect  
PROBHO 5 mm BBO BB-1H  
PULPROG zg30  
TD 65536  
SOLVENT CDCl3  
NS 16  
DS 2  
SWH 6172.839 Hz  
FIDRES 0.094190 Hz  
AQ 5.3084660 sec  
RG 456.1  
DW 81.000 usec  
DE 6.00 usec  
TE 300.0 K  
D1 1.00000000 sec

===== CHANNEL f1 =====

NUC1 1H  
P1 13.10 usec  
PL1 3.00 dB  
SF01 300.1318534 MHz

F2 - Processing parameters  
SI 32768  
SF 300.1300045 MHz  
WDW EM  
SSB 0  
LB 0.30 Hz  
GB 0  
PC 1.00

1D NMR plot parameters  
CX 27.00 cm  
F1P 10.000 ppm  
F1 3001.30 Hz  
F2P -0.500 ppm  
F2 -150.07 Hz  
PPMCM 0.38889 ppm/cm  
HZCM 116.71722 Hz/cm

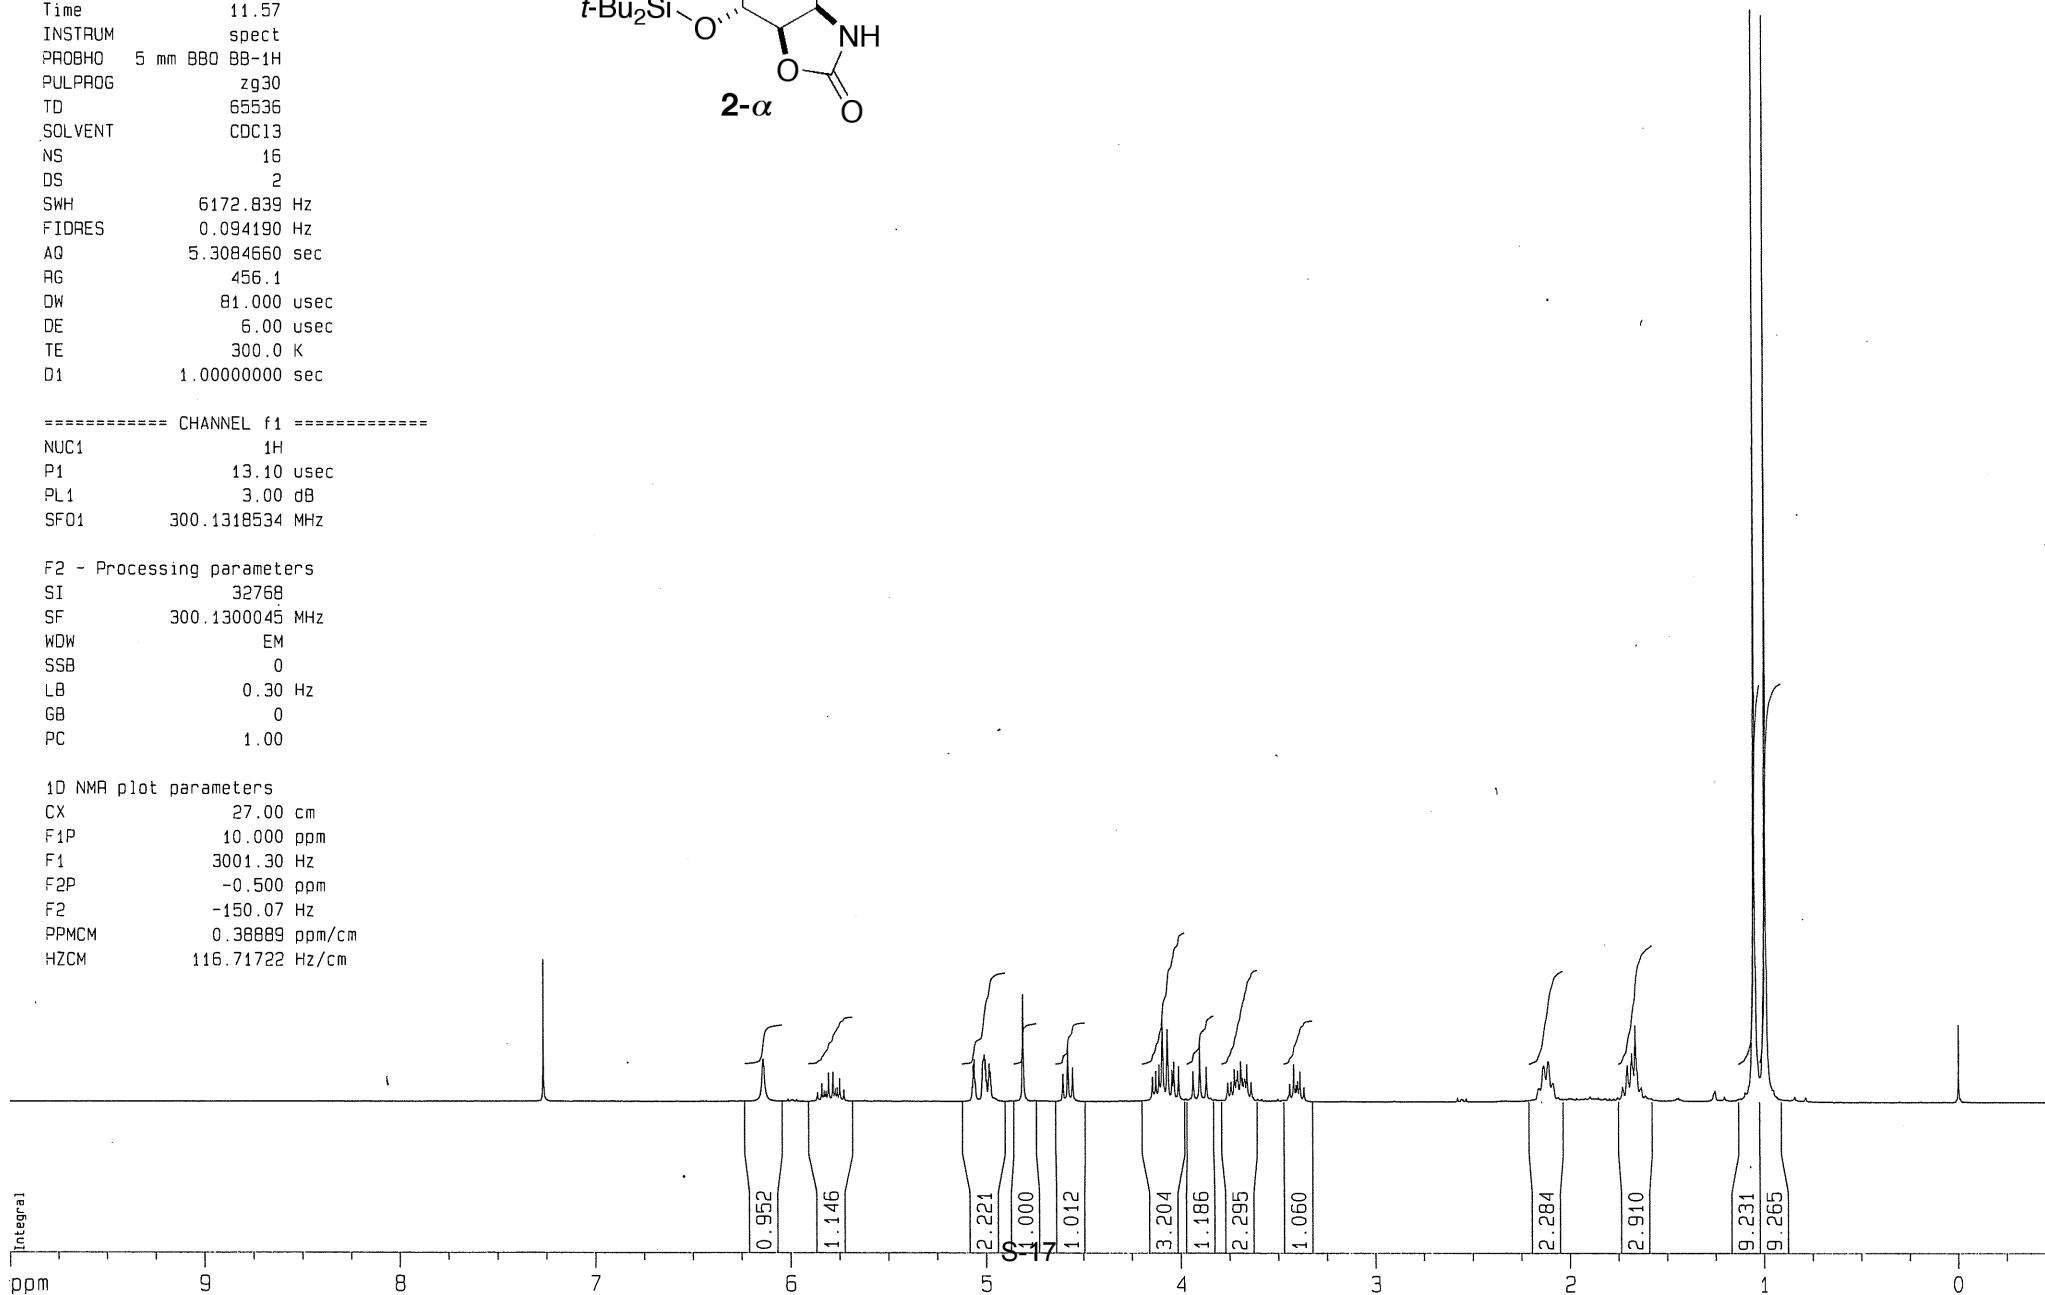

Current Data Parameters  
NAME II-CMR-255  
EXPNO 3  
PROCNO 1

II-CMR-255-F22-27

F2 - Acquisition Parameters

Date\_ 20030414  
Time 12.08  
INSTRUM spect  
PROBHD 5 mm BBO BB-1H  
PULPROG zg30  
TD 65536  
SOLVENT CDCl3  
NS 16  
DS 2  
SWH 6172.839 Hz  
FIDRES 0.094190 Hz  
AQ 5.3084660 sec  
RG 456.1  
DW 81.000 usec  
DE 6.00 usec  
TE 300.0 K  
D1 1.00000000 sec

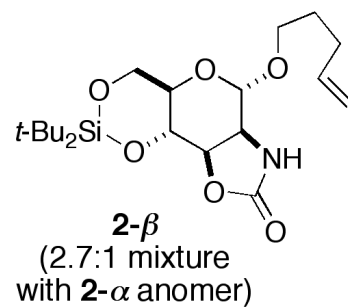

===== CHANNEL f1 =====

NUC1 1H  
P1 13.10 usec  
PL1 3.00 dB  
SF01 300.1318534 MHz

F2 - Processing parameters

SI 32768  
SF 300.1300045 MHz  
WDW EM  
SSB 0  
LB 0.30 Hz  
GB 0  
PC 1.00

1D NMR plot parameters

CX 27.00 cm  
F1P 10.000 ppm  
F1 3001.30 Hz  
F2P -0.500 ppm  
F2 -150.07 Hz  
PPMCM 0.38889 ppm/cm  
HZCM 116.71722 Hz/cm

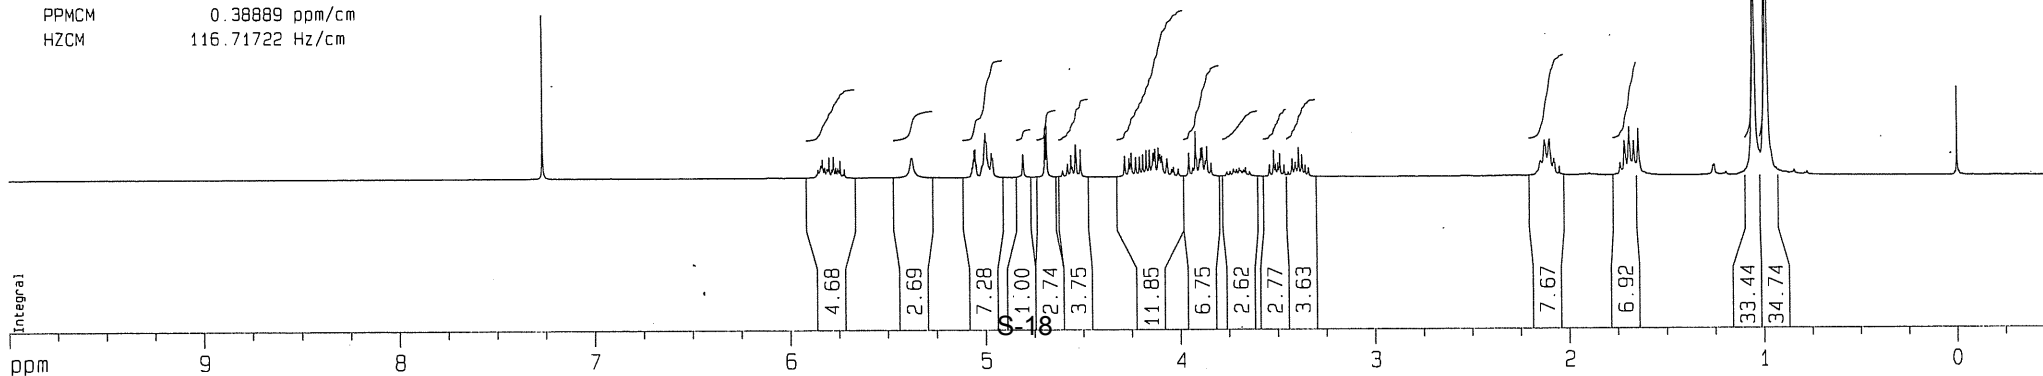

II-BKM-31

carbamate treated with iodosobenzene, Rh2(OAc)4, 4-penten-1-ol 4A Molecular Sieves

Current Data Parameters

NAME II-BKM-31  
EXPNO 1  
PROCNO 1

by-product

F29-37

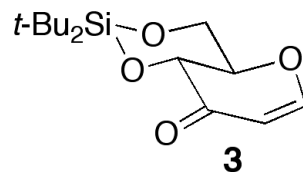

F2 - Acquisition Parameters

Date\_ 20040902  
Time 12.55  
INSTRUM spect  
PROBHD 5 mm BBO BB-1H  
PULPROG zg30  
TD 65536  
SOLVENT CDCl3  
NS 16  
DS 2  
SWH 6172.839 Hz  
FIDRES 0.094190 Hz  
AQ 5.3084660 sec  
RG 90.5  
DW 81.000 usec  
DE 6.00 usec  
TE 294.9 K  
D1 1.00000000 sec  
MCREST 0.00000000 sec  
MCWAK 0.01500000 sec

===== CHANNEL f1 =====

NUC1 1H  
P1 6.80 usec  
PL1 3.00 dB  
SF01 300.1318534 MHz

F2 - Processing parameters

SI 32768  
SF 300.1299984 MHz  
WDW EM  
SSB 0  
LB 0.30 Hz  
GB 0  
PC 1.00

1D NMR plot parameters

CX 27.00 cm  
CY 15.77 cm  
F1P 10.000 ppm  
F1 3001.30 Hz  
F2P -0.500 ppm  
F2 -150.07 Hz  
PPMCM 0.38889 ppm/cm  
HZCM 116.71722 Hz/cm

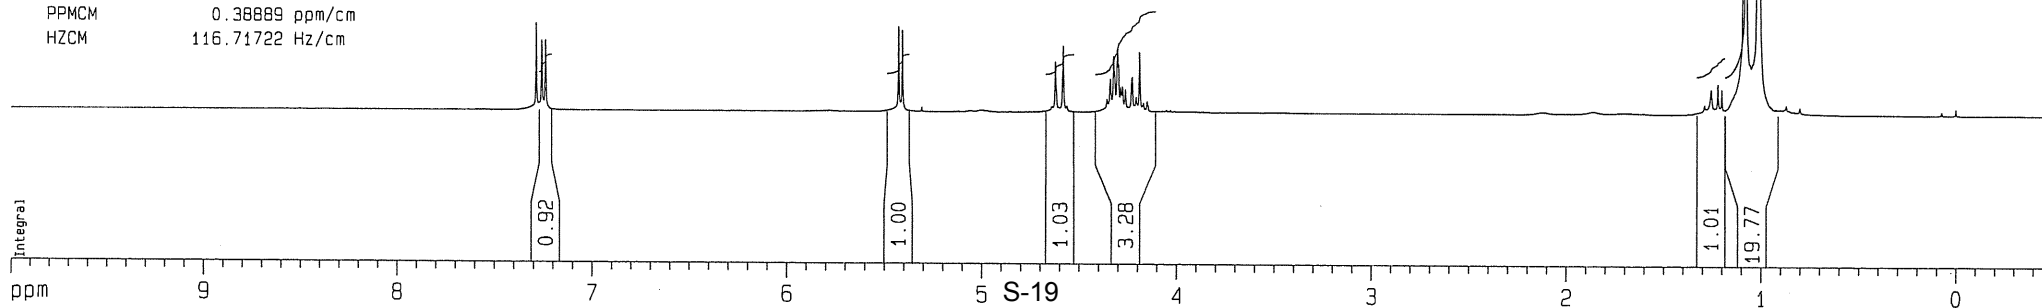

NAME I-ELS-37  
 EXPNO 1  
 PROCNO 1  
 Date 20100218  
 Time 15.15  
 INSTRUM spect  
 PROBHD 5 mm BBO BB-1H  
 PULPROG zg30  
 TD 65536  
 SOLVENT CDCl3  
 NS 18  
 DS 2  
 SWH 6172.839 Hz  
 FIDRES 0.094190 Hz  
 AQ 5.3084660 sec  
 RG 574.7  
 DW 81.000 usec  
 DE 6.50 usec  
 TE 294.5 K  
 D1 1.00000000 sec  
 TD0 1

I-ELS-37  
 1H NMR chromatographed pdt

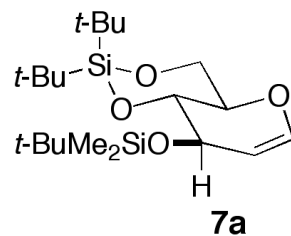

===== CHANNEL f1 =====  
 NUC1 1H  
 P1 6.90 usec  
 PL1 3.00 dB  
 SFO1 300.1318534 MHz  
 SI 32768  
 SF 300.1300056 MHz  
 WDW EM  
 SSB 0  
 LB 0.30 Hz  
 GB 0  
 PC 1.00

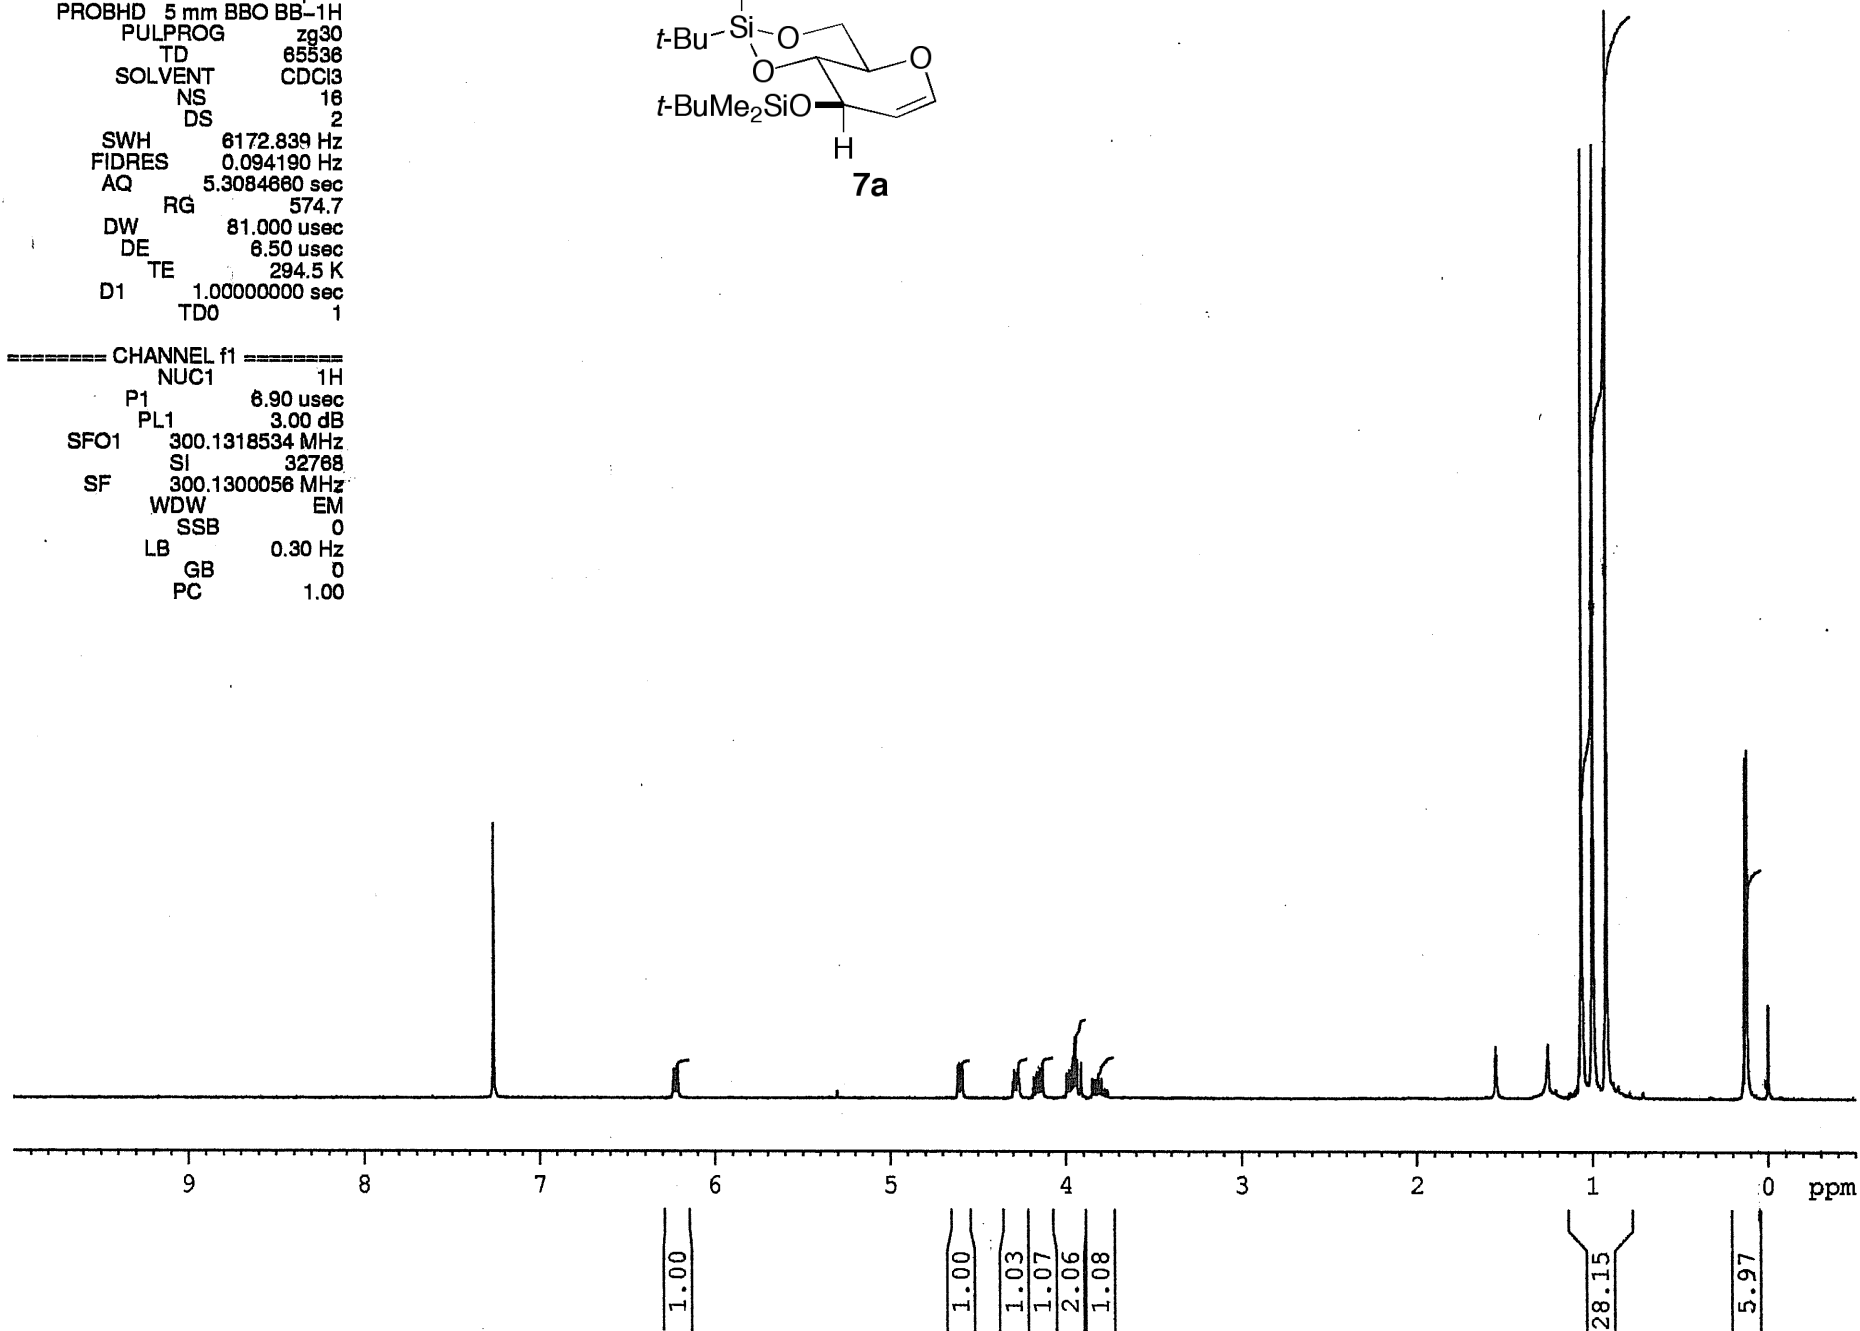

NAME I-ELS-41  
 EXPNO 3  
 PROCNO 1  
 Date\_ 20100408  
 Time 14.07  
 INSTRUM spect  
 PROBHD 5 mm BBO BB-1H  
 PULPROG zgpg30  
 TD 65536  
 SOLVENT CDCl3  
 NS 585  
 DS 4  
 SWH 17985.611 Hz  
 FIDRES 0.274439 Hz  
 AQ 1.8219508 sec  
 RG 32768  
 DW 27.800 usec  
 DE 6.00 usec  
 TE 300.1 K  
 D1 2.00000000 sec  
 D11 0.03000000 sec  
 TD0 1

===== CHANNEL f1 =====  
 NUC1 13C  
 P1 9.80 usec  
 PL1 6.00 dB  
 SFO1 75.4752953 MHz

===== CHANNEL f2 =====  
 CPDPRG2 waltz16  
 NUC2 1H  
 PCPD2 67.00 usec  
 PL2 3.00 dB  
 PL12 24.00 dB  
 PL13 24.00 dB  
 SFO2 300.1312005 MHz  
 SI 32768  
 SF 75.4677480 MHz  
 WDW EM  
 SSB 0  
 LB 3.00 Hz  
 GB 0  
 PC 1.40

Carbon decoupled  
recovered s.m.

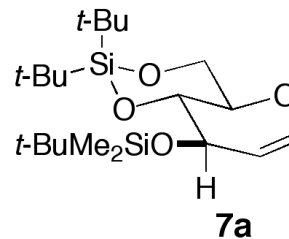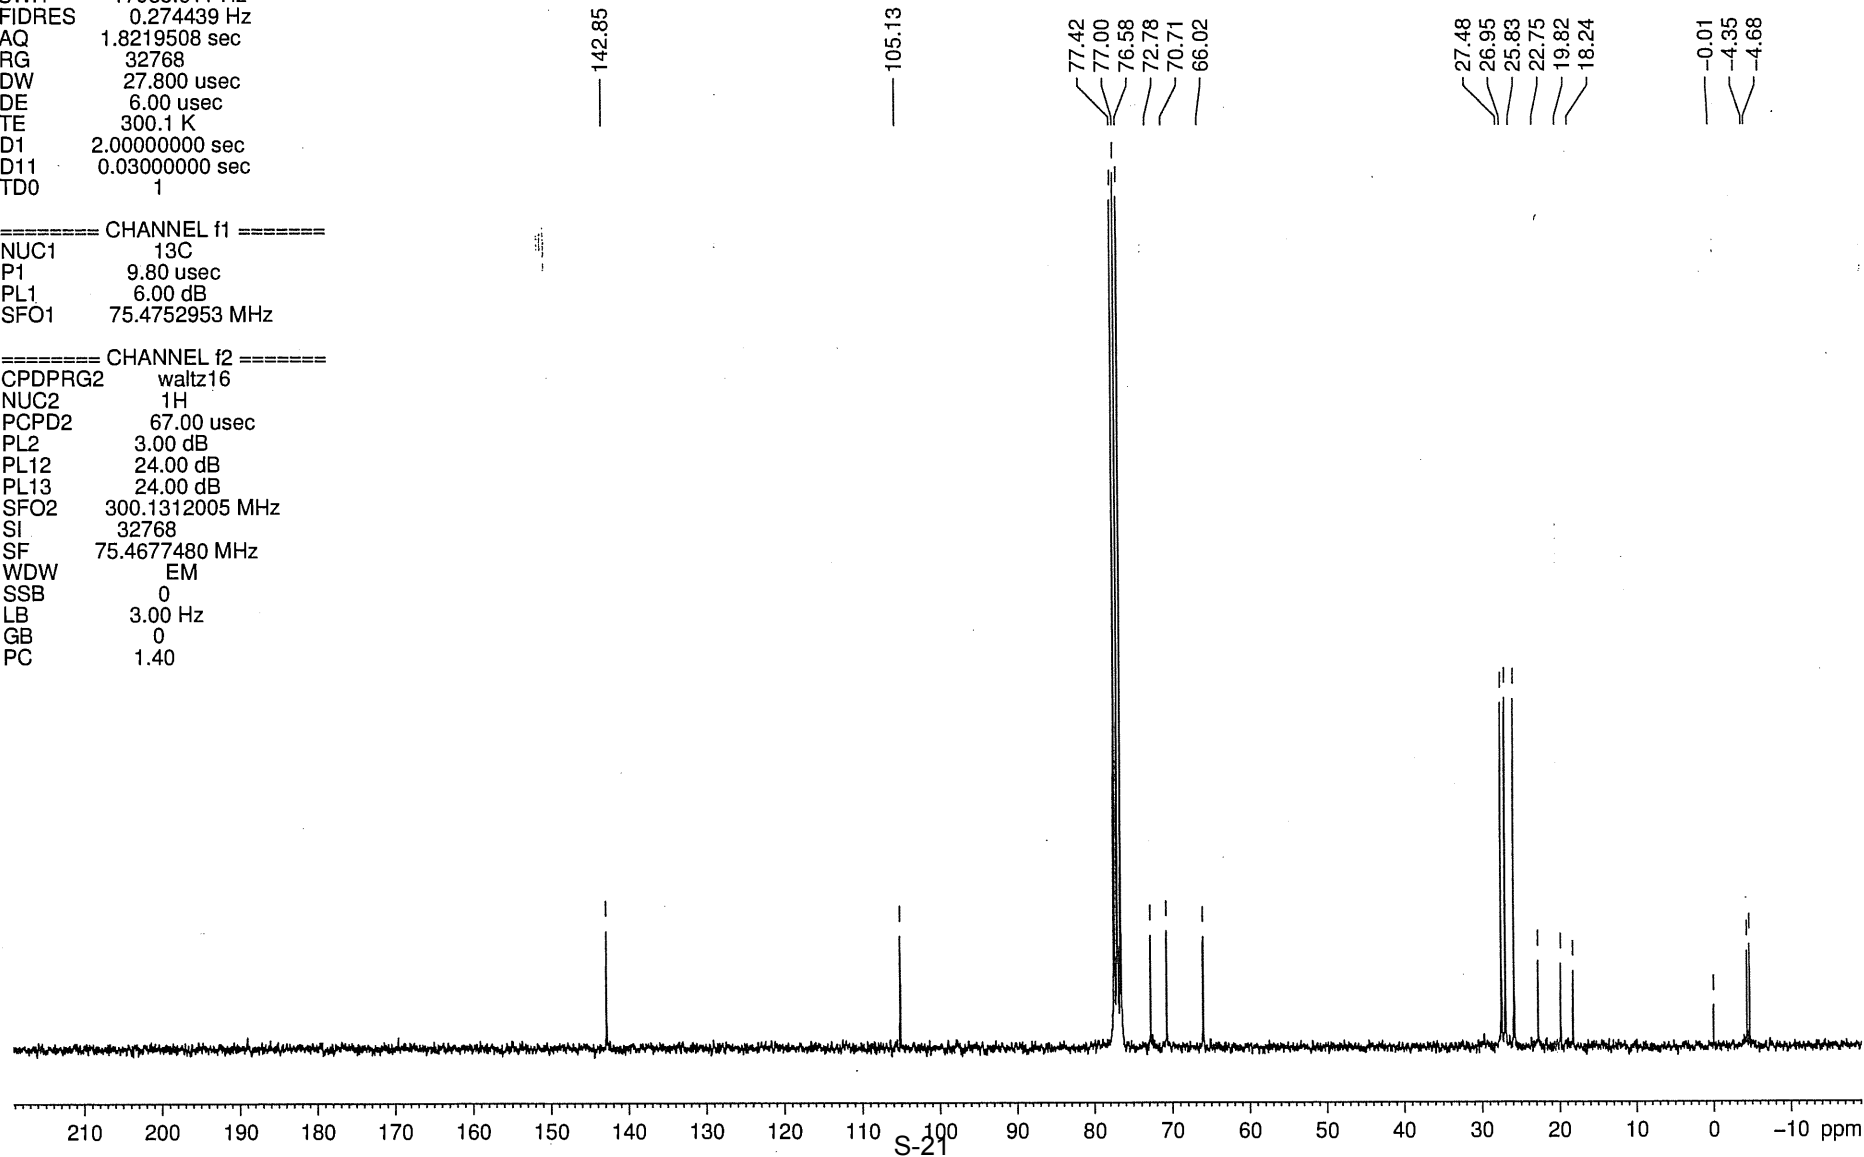

Current Data Parameters  
NAME I-VB-23  
EXPNO 1  
PROCNO 1

F2 - Acquisition Parameters  
Date\_ 20050727  
Time 15.52  
INSTRUM spect  
PROBHD 5 mm BBO BB-1H  
PULPROG zg30  
TD 65536  
SOLVENT CDCl3  
NS 16  
DS 2  
SWH 6172.839 Hz  
FIDRES 0.094190 Hz  
AQ 5.3084660 sec  
RG 128  
DW 81.000 usec  
DE 6.00 usec  
TE 294.3 K  
D1 1.00000000 sec  
TD0 1

===== CHANNEL f1 =====  
NUC1 1H  
P1 6.80 usec  
PL1 3.00 dB  
SFO1 300.1318534 MHz

F2 - Processing parameters  
SI 32768  
SF 300.1300033 MHz  
WDW EM  
SSB 0  
LB 0.30 Hz  
GB 0  
PC 1.00

I-VB-23  
Chromatographed 3-Acylated D-glucal

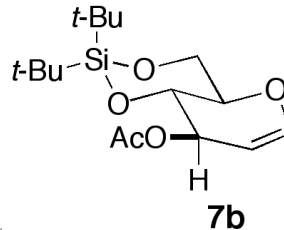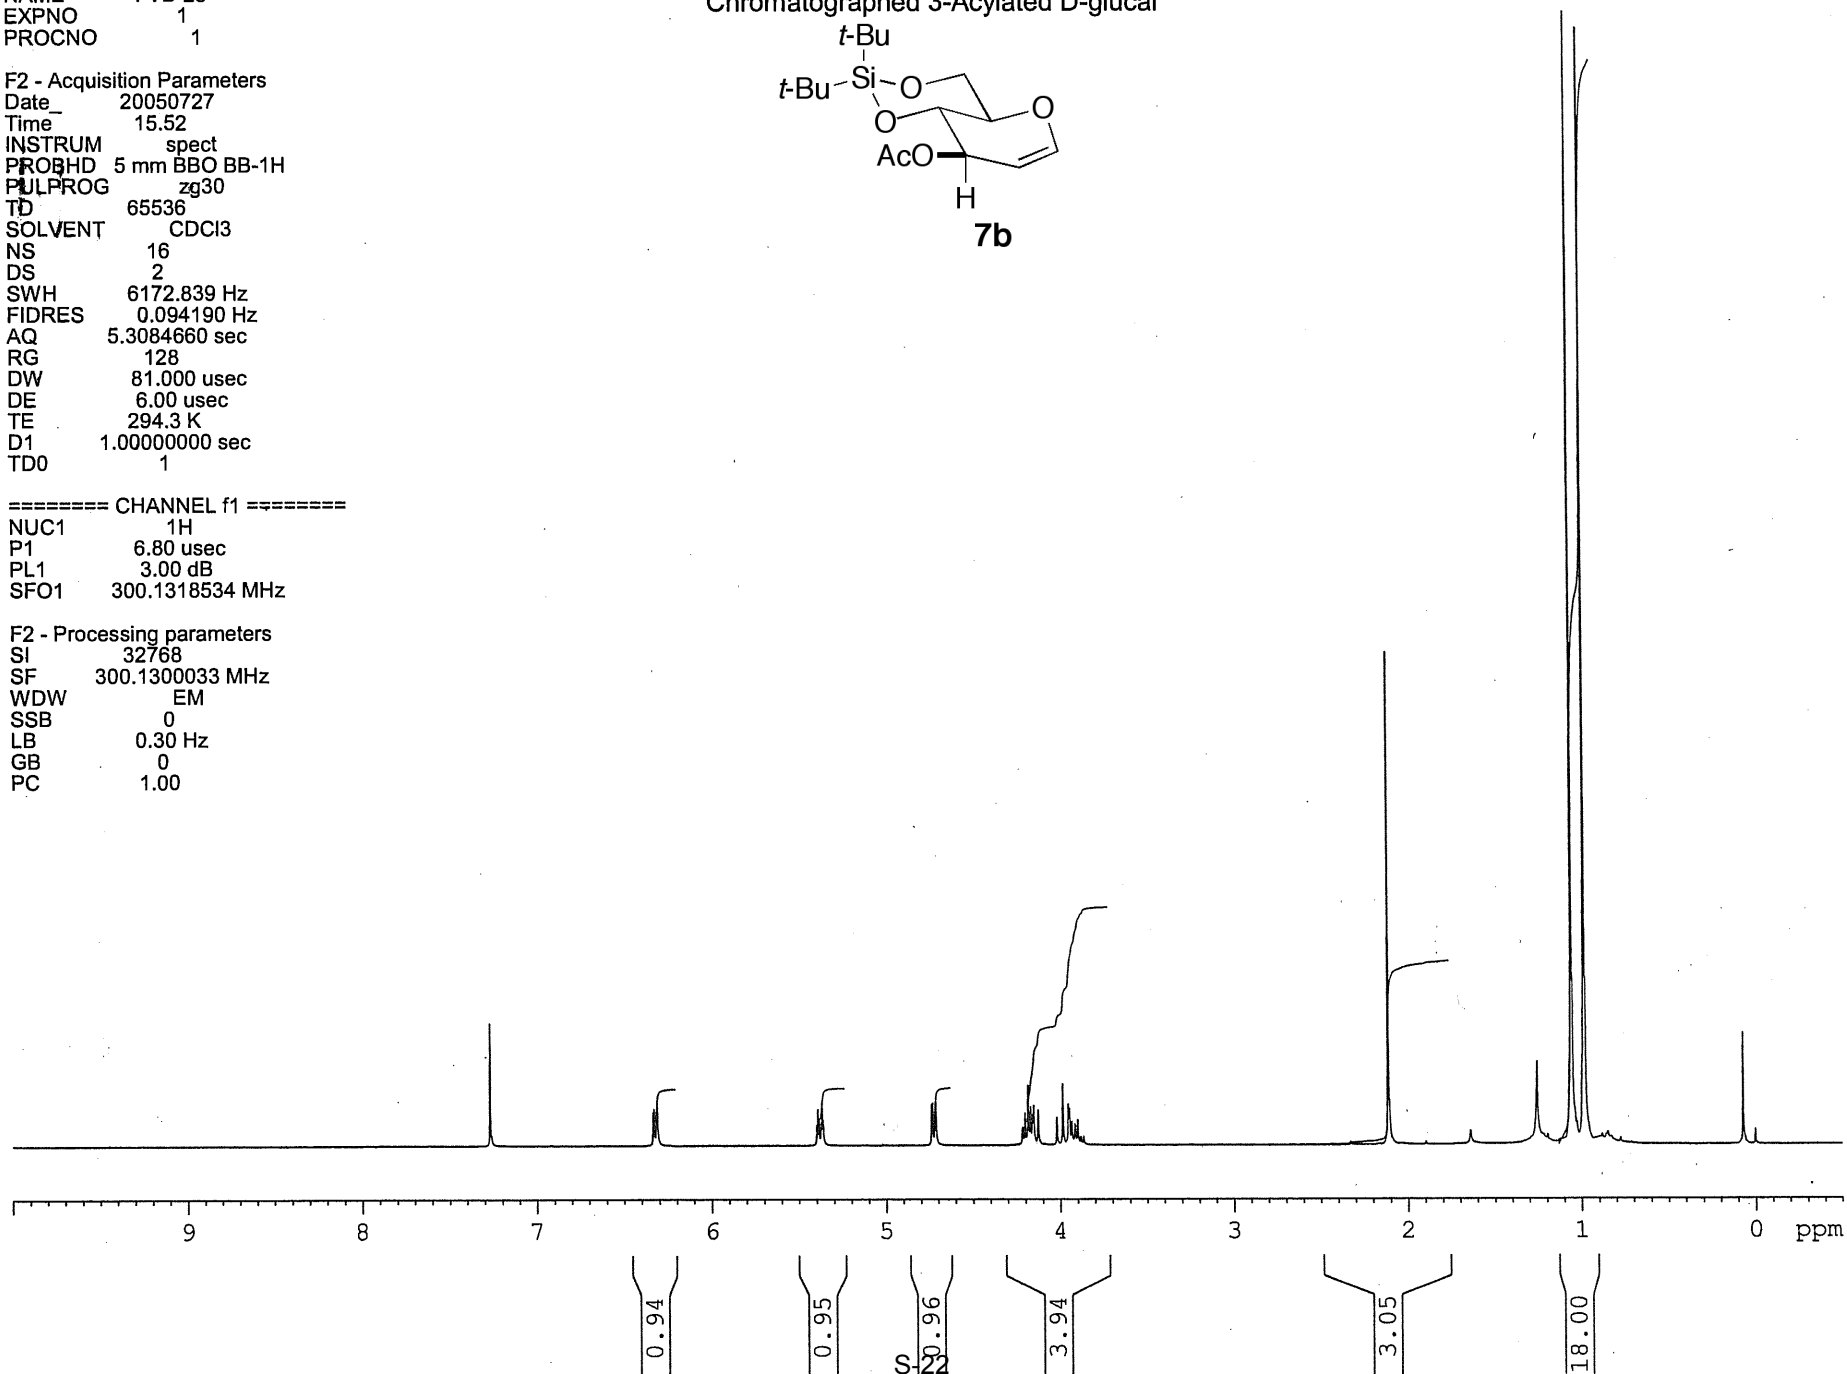

NAME I-VB-23  
EXPNO 3  
PROCNO 2  
Date\_ 20050727  
Time 20.16  
INSTRUM spect  
PROBHD 5 mm BBO BB-1H  
PULPROG zgpg30  
TD 65536  
SOLVENT CDCl3  
NS 512  
DS 4  
SWH 18518.518 Hz  
FIDRES 0.282570 Hz  
AQ 1.7695220 sec  
RG 1290.2  
DW 27.000 usec  
DE 6.00 usec  
TE 295.3 K  
D1 2.00000000 sec  
d11 0.03000000 sec  
DELTA 1.89999998 sec  
TD0 1

I-VB-23  
Chromatographed 3-Acylated D-glucal CNMR  
LB = 3 by CMR

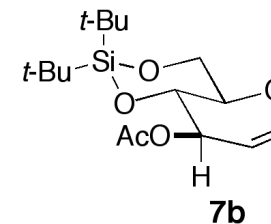

===== CHANNEL f1 =====  
NUC1 13C  
P1 5.50 usec  
PL1 2.00 dB  
SFO1 75.4752653 MHz

===== CHANNEL f2 =====  
CPDPRG2 waltz16  
NUC2 1H  
PCPD2 80.00 usec  
PL2 3.00 dB  
PL12 24.41 dB  
PL13 24.00 dB  
SFO2 300.1312005 MHz  
SI 32768  
SF 75.4677498 MHz  
WDW EM  
SSB 0  
LB 3.00 Hz  
GB 0  
PC 1.40

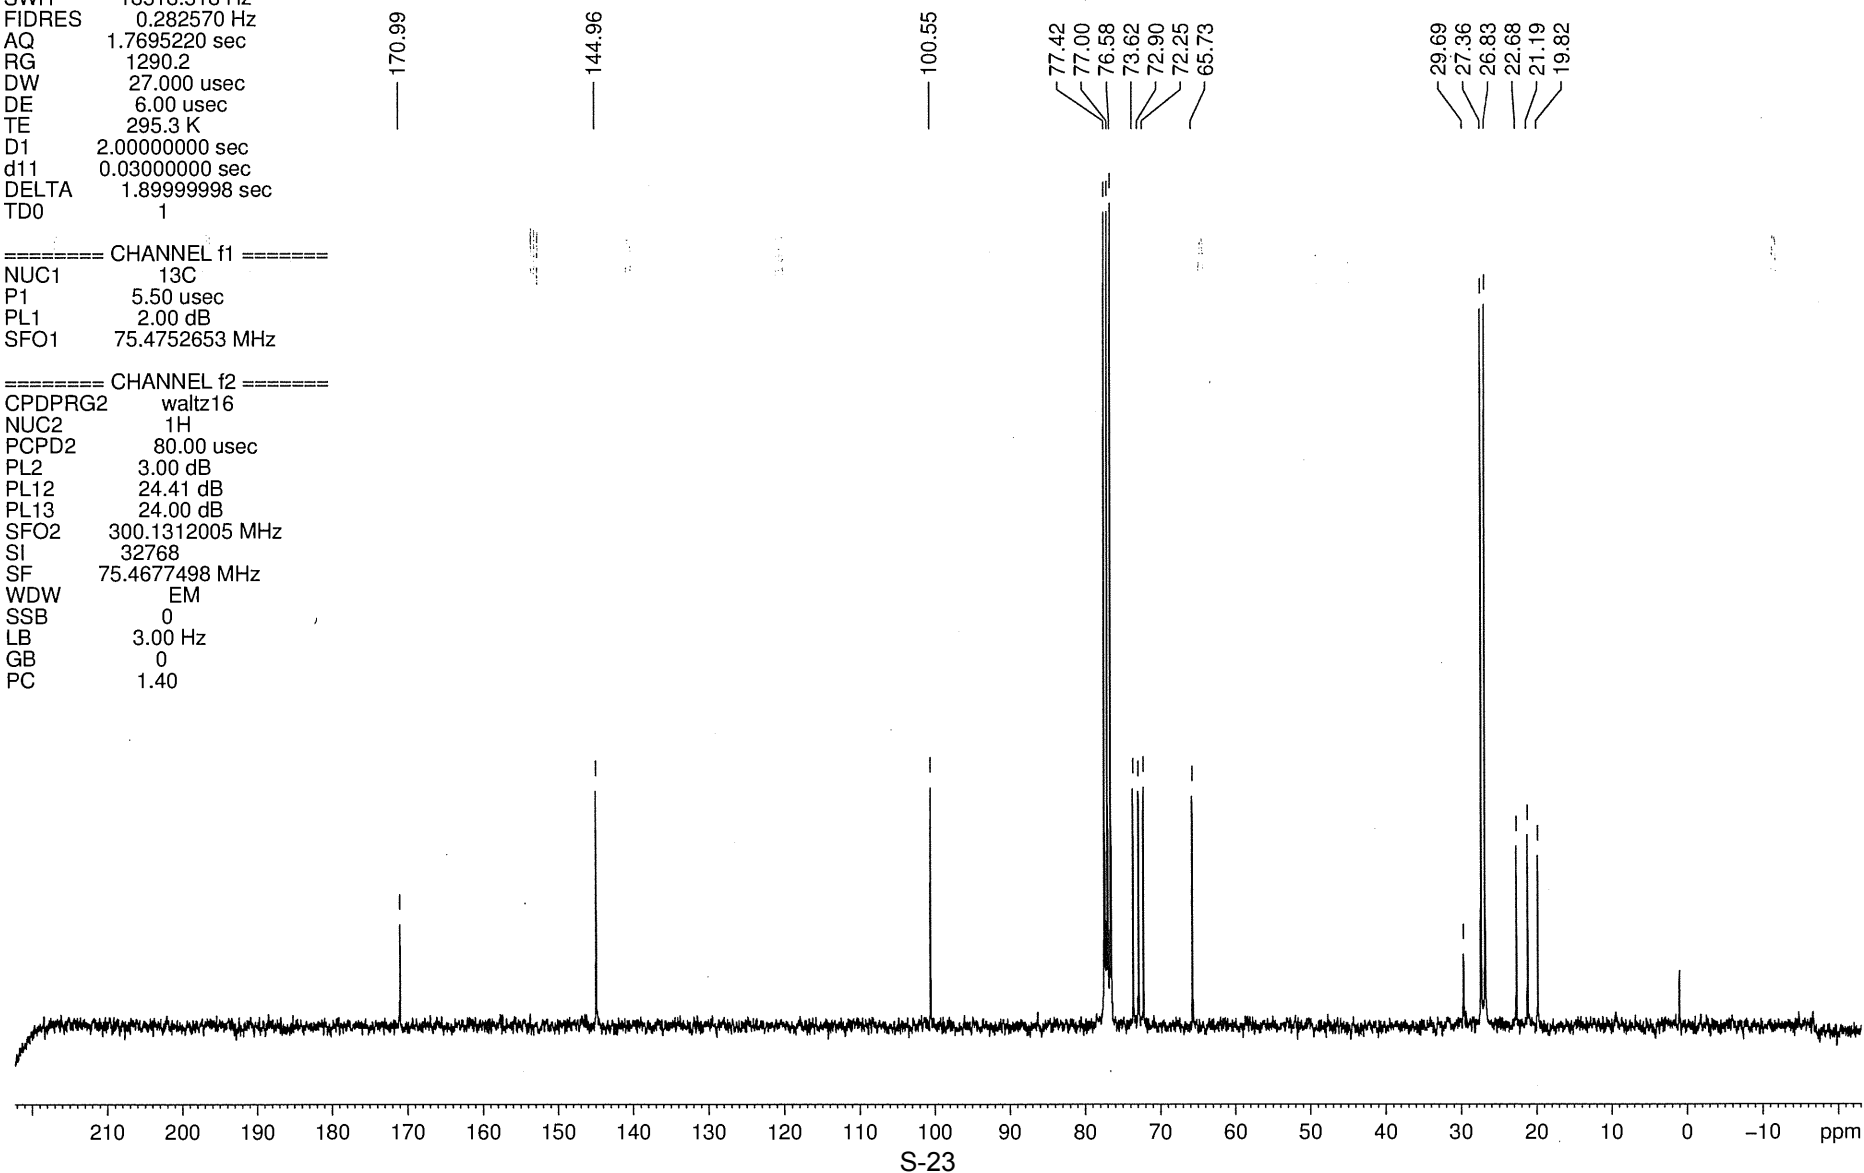

Current Data Parameters  
NAME II-LR-3  
EXPNO 6  
PROCNO 1

F2 - Acquisition Parameters  
Date\_ 20080218  
Time 12.54  
INSTRUM spect  
PROBHD 5 mm BBO BB-1H  
PULPROG zg30  
TD 65536  
SOLVENT CDCl3  
NS 16  
DS 2  
SWH 6172.839 Hz  
FIDRES 0.094190 Hz  
AQ 5.3084660 sec  
RG 228.1  
DW 81.000 usec  
DE 6.00 usec  
TE 294.4 K  
D1 1.00000000 sec  
TD0 1

===== CHANNEL f1 =====  
NUC1 1H  
P1 6.56 usec  
PL1 3.00 dB  
SFO1 300.1318534 MHz

F2 - Processing parameters  
SI 32768  
SF 300.1300046 MHz  
WDW EM  
SSB 0  
LB 0.30 Hz  
GB 0  
PC 1.00

II-LR-3  
Silyl-protected N-tosylated D-glucal 3-carbamate  
1H NMR

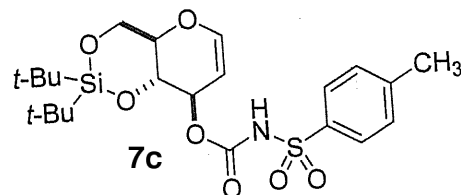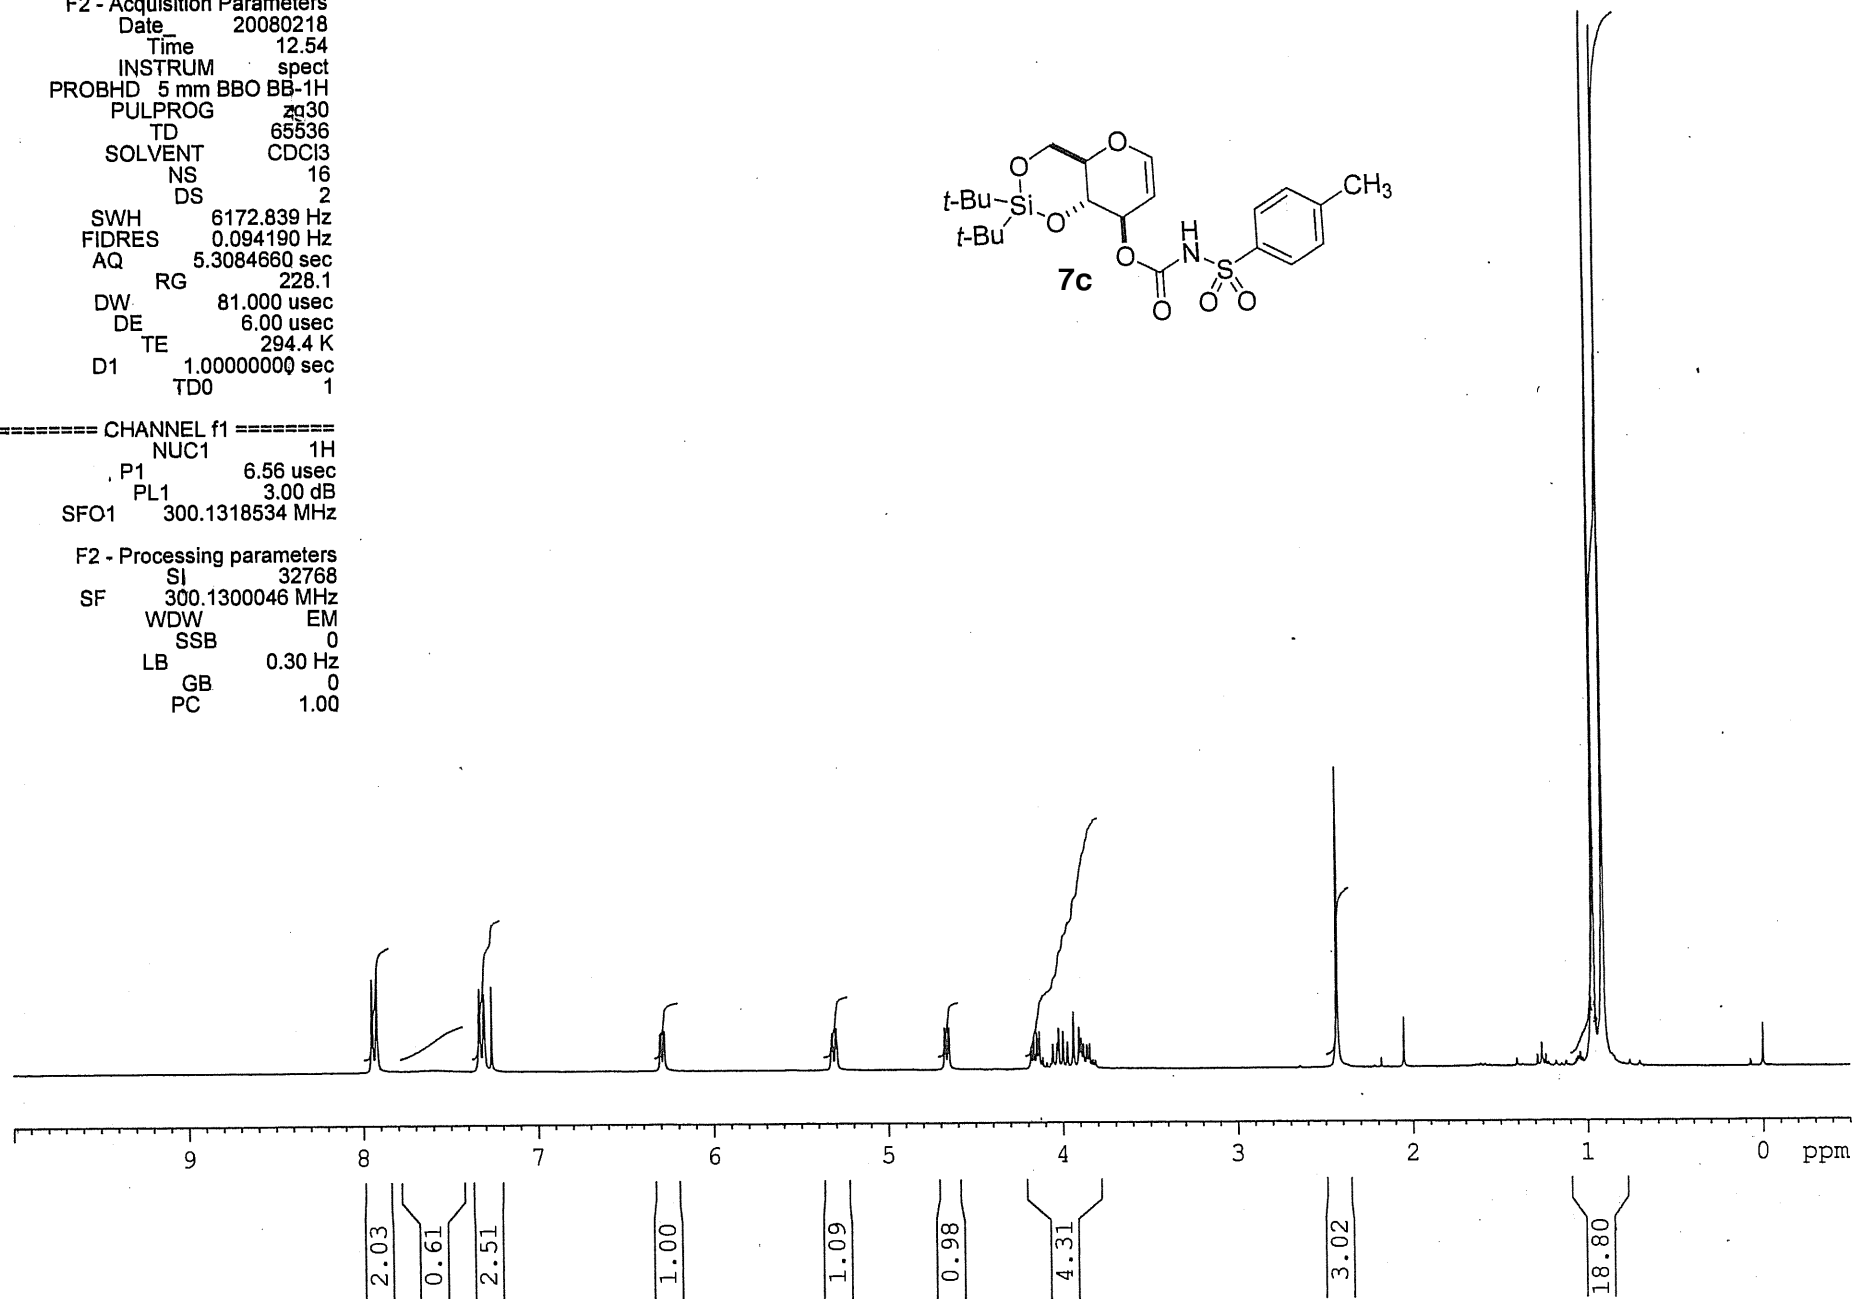



## Current Data Parameters

NAME II-LR-3  
EXPNO 8  
PROCNO 1

## F2 - Acquisition Parameters

Date\_ 20080218  
Time 13.15  
INSTRUM spect  
PROBHD 5 mm BBO BB-1H  
PULPROG zgpg30  
TD 65536  
SOLVENT CDCl3  
NS 708  
DS 4  
SWH 17985.611 Hz  
FIDRES 0.274439 Hz  
AQ 1.8219508 sec  
RG 32768  
DW 27.800 usec  
DE 6.00 usec  
TE 295.0 K  
D1 2.00000000 sec  
d11 0.03000000 sec  
DELTA 1.89999998 sec  
TD0 1

## ===== CHANNEL f1 =====

NUC1 13C  
P1 9.00 usec  
PL1 6.00 dB  
SFO1 75.4752953 MHz

## ===== CHANNEL f2 =====

CPDPRG2 waltz16  
NUC2 1H  
PCPD2 81.00 usec  
PL12 26.00 dB  
PL13 26.00 dB  
PL2 3.00 dB  
SFO2 300.1312005 MHz

## F2 - Processing parameters

SI 32768  
SF 75.4677514 MHz  
WDW EM  
SSB 0  
LB 3.00 Hz  
GB 0  
PC 1.40

II-LR-3  
Silyl-protected N-tosylated D-glucal 3-carbamate  
13C NMR

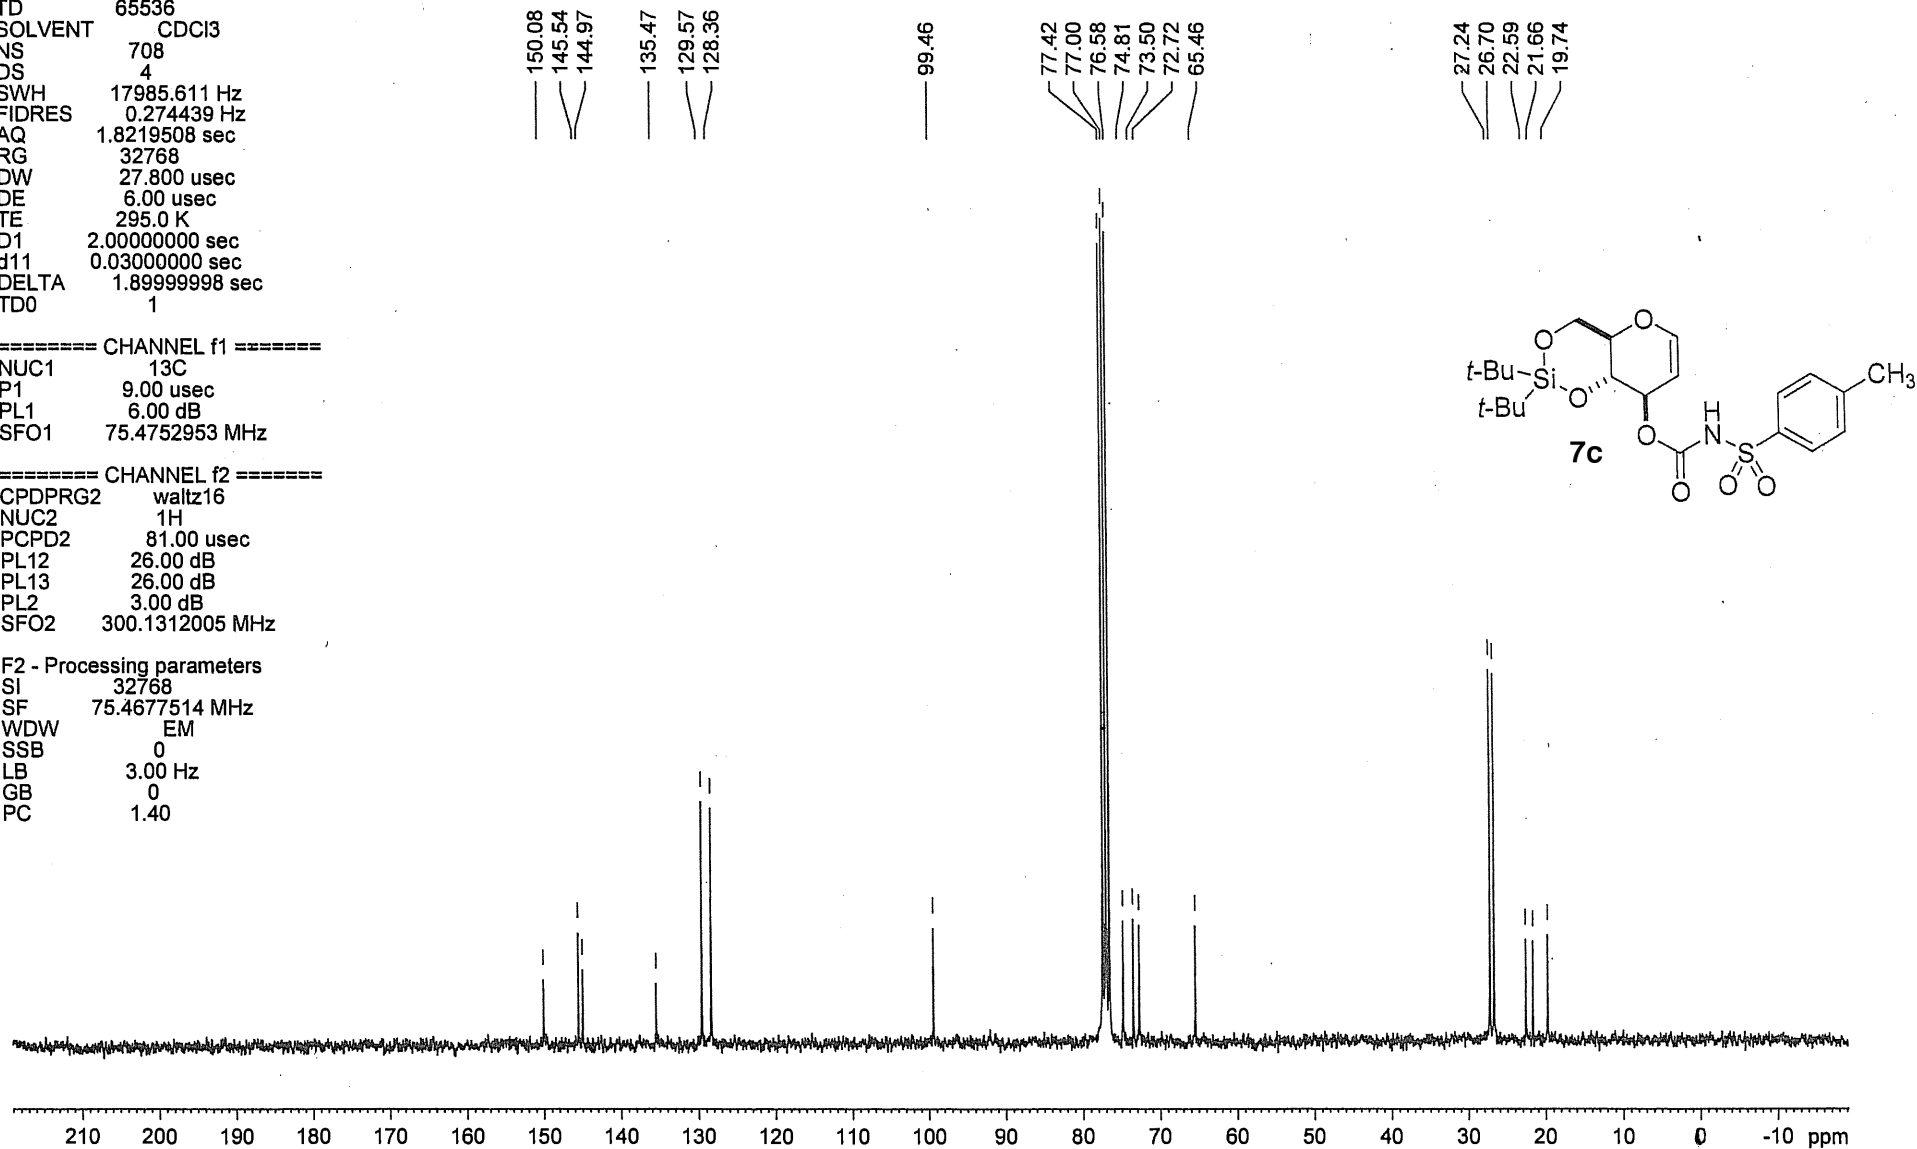

Current Data Parameters  
NAME I-VB-31  
EXPNO 2  
PROCNO 1

F2 - Acquisition Parameters  
Date\_ 20050811  
Time 13.12  
INSTRUM spect  
PROBHD 5 mm BBO BB-1H  
PULPROG zg30  
TD 65536  
SOLVENT CDCl3  
NS 16  
DS 2  
SWH 6172.839 Hz  
FIDRES 0.094190 Hz  
AQ 5.3084660 sec  
RG 90.5  
DW 81.000 usec  
DE 6.00 usec  
TE 293.2 K  
D1 1.00000000 sec  
TD0 1

===== CHANNEL f1 =====  
NUC1 1H  
P1 6.80 usec  
PL1 3.00 dB  
SFO1 300.1318534 MHz

F2 - Processing parameters  
SI 32768  
SF 300.1300072 MHz  
WDW EM  
SSB 0  
LB 0.30 Hz  
GB 0  
PC 1.00

I-VB-31  
Chrom. Product: Phenyl Carbamate

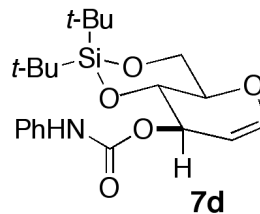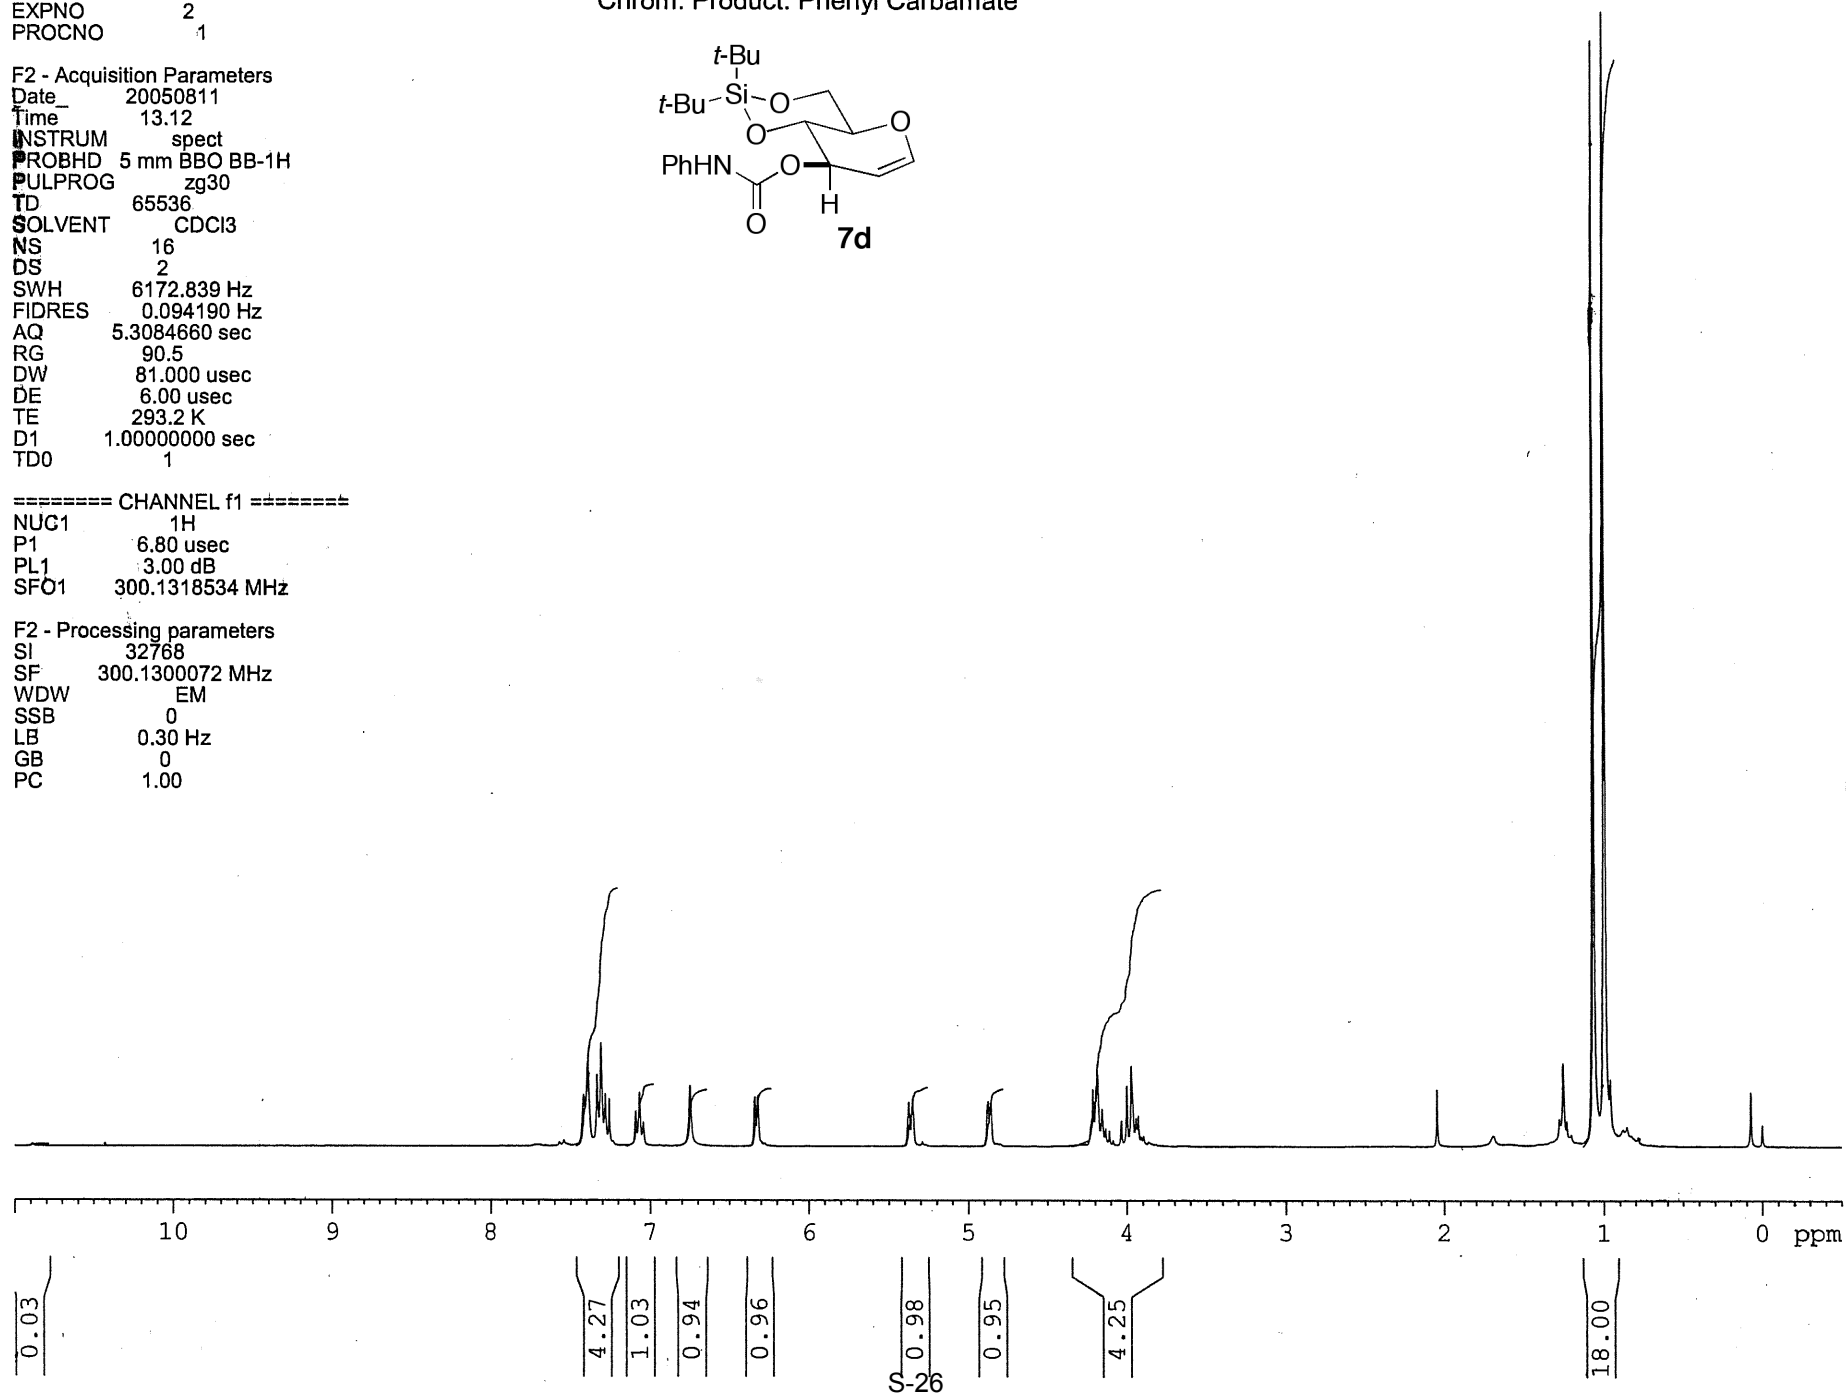

NAME I-VB-31  
EXPNO 4  
PROCNO 2  
Date\_ 20050811  
Time 18.29  
INSTRUM spect  
PROBHD 5 mm BBO BB-1H  
PULPROG zgpg30  
TD 65536  
SOLVENT CDCl3  
NS 1024  
DS 4  
SWH 18518.518 Hz  
FIDRES 0.282570 Hz  
AQ 1.7695220 sec  
RG 2580.3  
DW 27.000 usec  
DE 6.00 usec  
TE 295.1 K  
D1 2.00000000 sec  
d11 0.03000000 sec  
DELTA 1.89999998 sec  
TD0 1

I-VB-31  
Chrom Pdt CNMR: Phenyl Carbamate  
LB = 3 by CMR

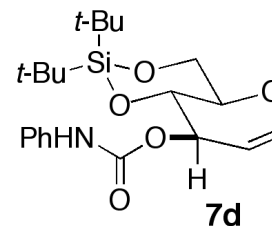

===== CHANNEL f1 =====  
NUC1 13C  
P1 5.50 usec  
PL1 2.00 dB  
SFO1 75.4752653 MHz

===== CHANNEL f2 =====  
CPDPRG2 waltz16  
NUC2 1H  
PCPD2 80.00 usec  
PL2 3.00 dB  
PL12 24.41 dB  
PL13 24.00 dB  
SFO2 300.1312005 MHz  
SI 32768  
SF 75.4677523 MHz  
WDW EM  
SSB 0  
LB 3.00 Hz  
GB 0  
PC 1.40

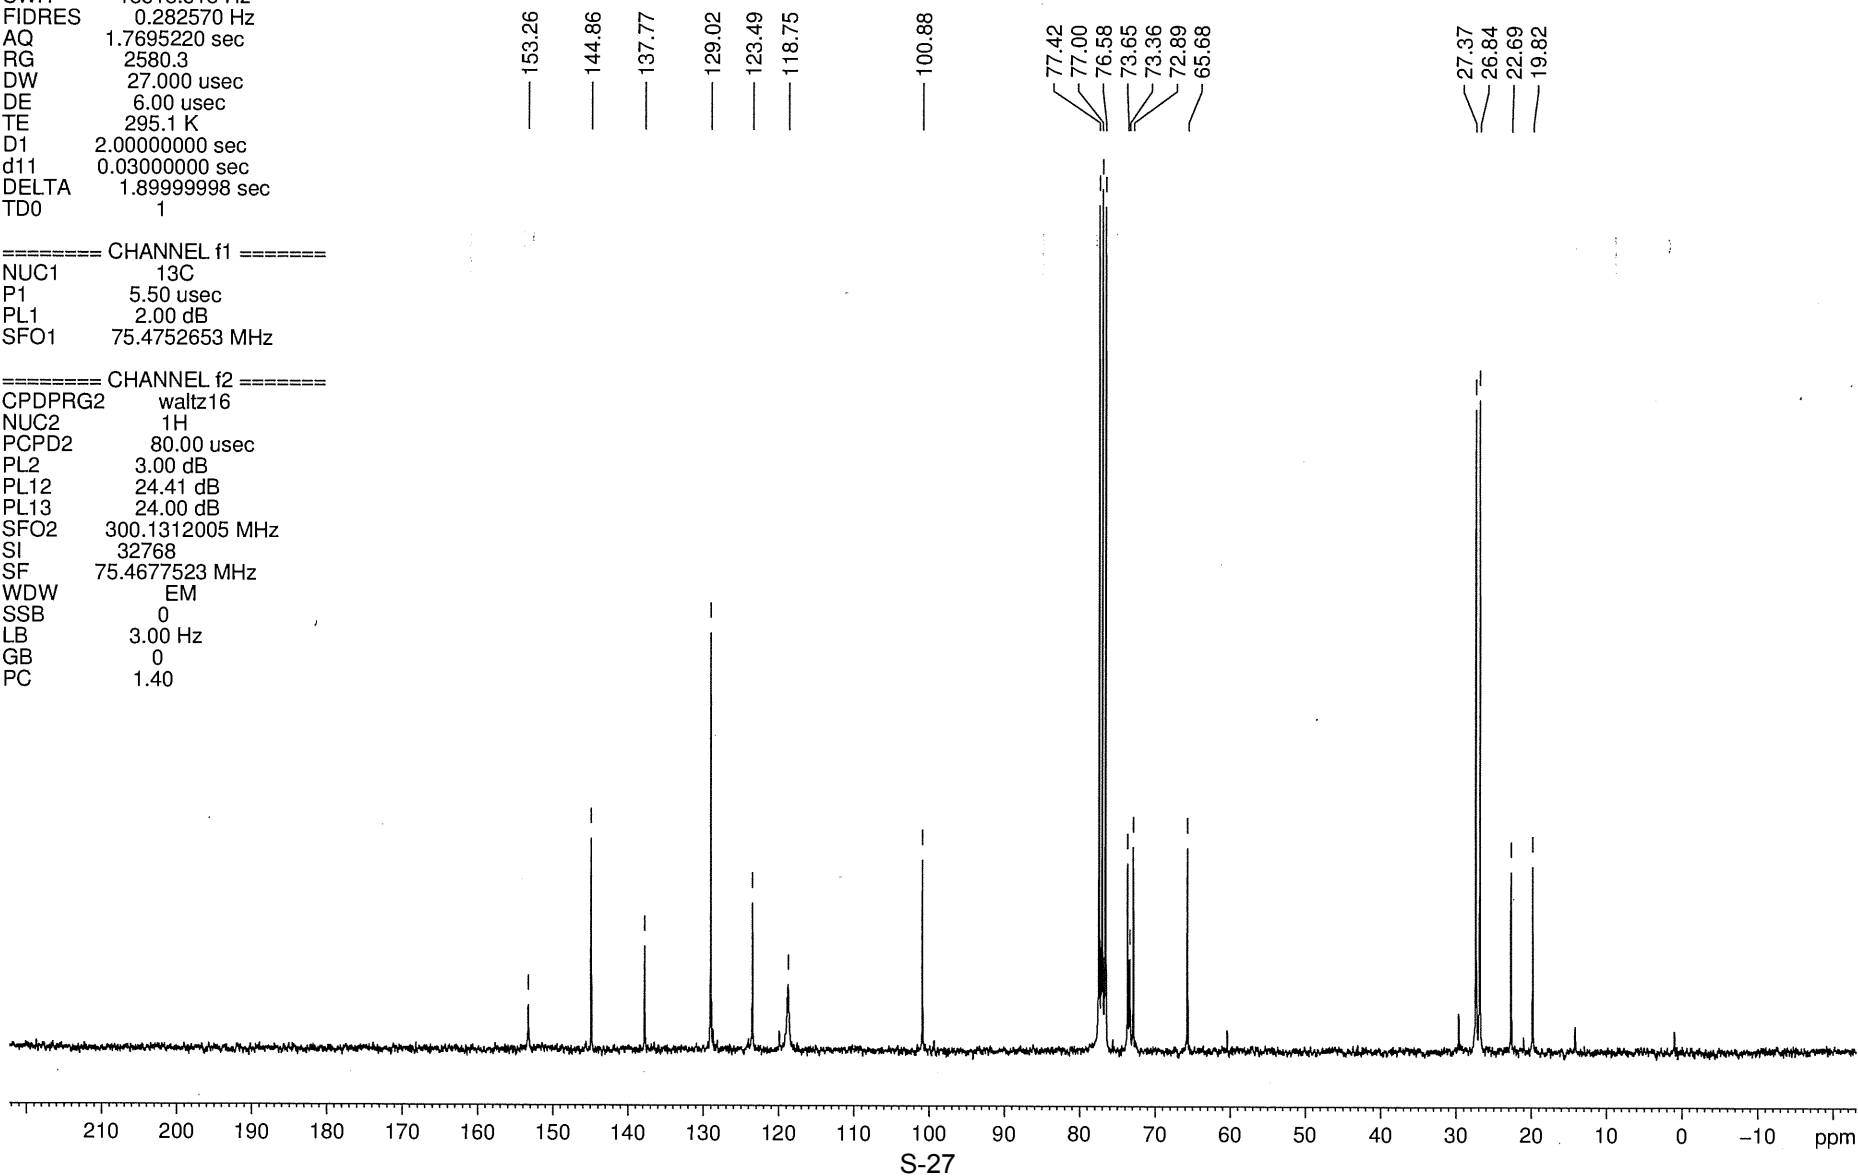

I-AS-95  
Rechromatographed by CMR  
June 9, 2003

Current Data Parameters  
NAME I-AS-95  
EXPNO 1  
PROCNO 1

F2 - Acquisition Parameters

Date\_ 20030609  
Time 14.23  
INSTRUM spect  
PROBHD 5 mm BBO BB-1H  
PULPROG zg30  
TD 65536  
SOLVENT CDCl3  
NS 16  
DS 2  
SWH 6172.839 Hz  
FIDRES 0.094190 Hz  
AQ 5.3084660 sec  
RG 90.5  
DW 81.000 usec  
DE 6.00 usec  
TE 300.0 K  
D1 1.00000000 sec

===== CHANNEL f1 =====

NUC1 1H  
P1 21.25 usec  
PL1 3.00 dB  
SF01 300.1318534 MHz

F2 - Processing parameters

SI 32768  
SF 300.1300071 MHz  
WDW EM  
SSB 0  
LB 0.30 Hz  
GB 0  
PC 1.00

1D NMR plot parameters

CX 27.00 cm  
F1P 10.000 ppm  
F1 3001.30 Hz  
F2P -0.500 ppm  
F2 -150.07 Hz  
PPMCM 0.38889 ppm/cm  
HZCM 116.71722 Hz/cm

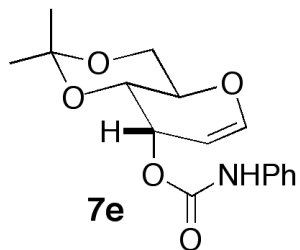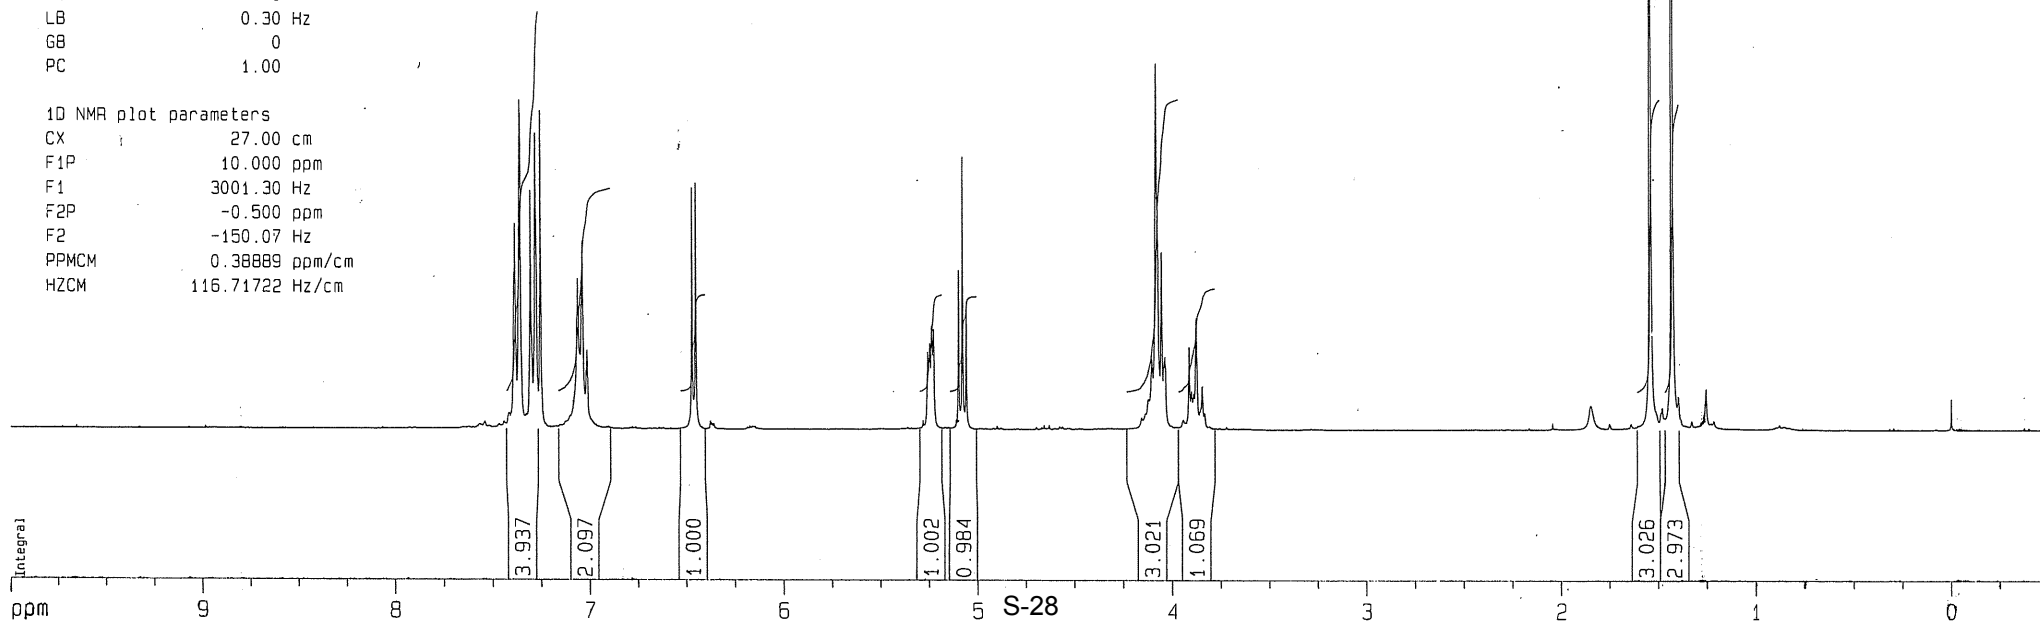

I-AS-95  
 Rechromatographed by CMR  
 13C NMR, June 9, 2003

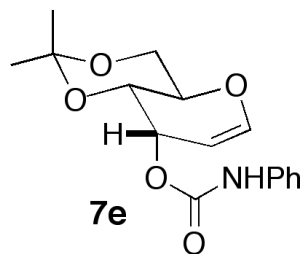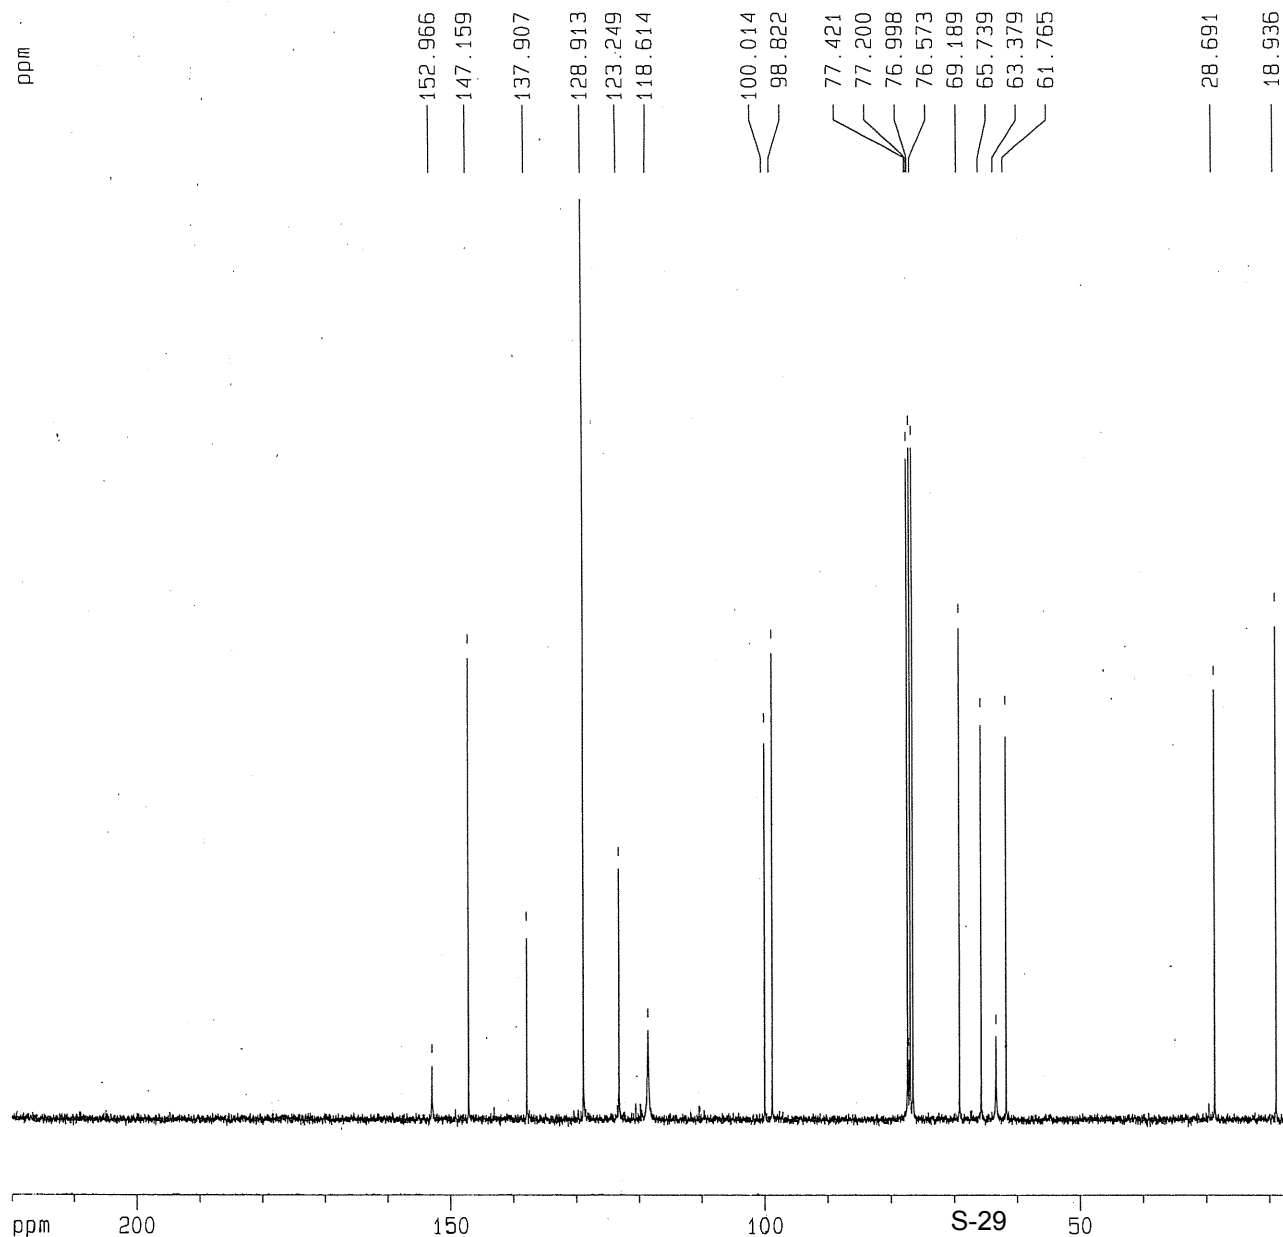

Current Data Parameters  
 NAME I-AS-95  
 EXPNO 2  
 PROCNO 1

F2 - Acquisition Parameters  
 Date\_ 20030609  
 Time 15.09  
 INSTRUM spect  
 PROBHD 5 mm BBO BB-1H  
 PULPROG zgpg30  
 TD 65536  
 SOLVENT CDCl3  
 NS 1024  
 DS 4  
 SWH 18518.518 Hz  
 FIDRES 0.282570 Hz  
 AQ 1.7695220 sec  
 RG 1149.4  
 DW 27.000 usec  
 DE 6.00 usec  
 TE 300.0 K  
 D1 2.00000000 sec  
 d11 0.03000000 sec  
 d12 0.00002000 sec

===== CHANNEL f1 =====  
 NUC1 13C  
 P1 23.13 usec  
 PL1 6.00 dB  
 SF01 75.4752653 MHz

===== CHANNEL f2 =====  
 CPDPRG2 waltz16  
 NUC2 1H  
 PCPD2 90.00 usec  
 PL2 3.00 dB  
 PL12 14.75 dB  
 PL13 24.00 dB  
 SF02 300.1312005 MHz

F2 - Processing parameters  
 SI 32768  
 SF 75.4677561 MHz  
 WDW EM  
 SSB 0  
 LB 1.00 Hz  
 GB 0  
 PC 1.40

1D NMR plot parameters  
 CX 20.00 cm  
 F1P 220.000 ppm  
 F1 16602.91 Hz  
 F2P -20.000 ppm  
 F2 -1509.35 Hz  
 PPMCM 12.00000 ppm/cm  
 HZCM 905.61310 Hz/cm

NAME I-BH-7  
 EXPNO 4  
 PROCNO 1  
 Date\_ 20090617  
 Time 18.13  
 INSTRUM spect  
 PROBHD 5 mm BBO BB-1H  
 PULPROG zg30  
 TD 65536  
 SOLVENT CDCl3  
 NS 16  
 DS 2  
 SWH 6172.839 Hz  
 FIDRES 0.094190 Hz  
 AQ 5.3084660 sec  
 RG 181  
 DW 81.000 usec  
 DE 6.50 usec  
 TE 294.8 K  
 D1 1.00000000 sec  
 TD0 1

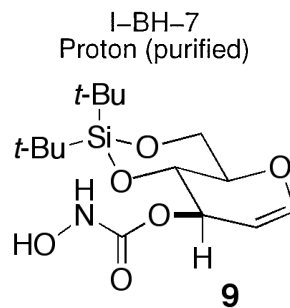

===== CHANNEL f1 =====  
 NUC1 1H  
 P1 7.00 usec  
 PL1 3.00 dB  
 SFO1 300.1318534 MHz  
 SI 32768  
 SF 300.1300042 MHz  
 WDW EM  
 SSB 0  
 LB 0.30 Hz  
 GB 0  
 PC 1.00

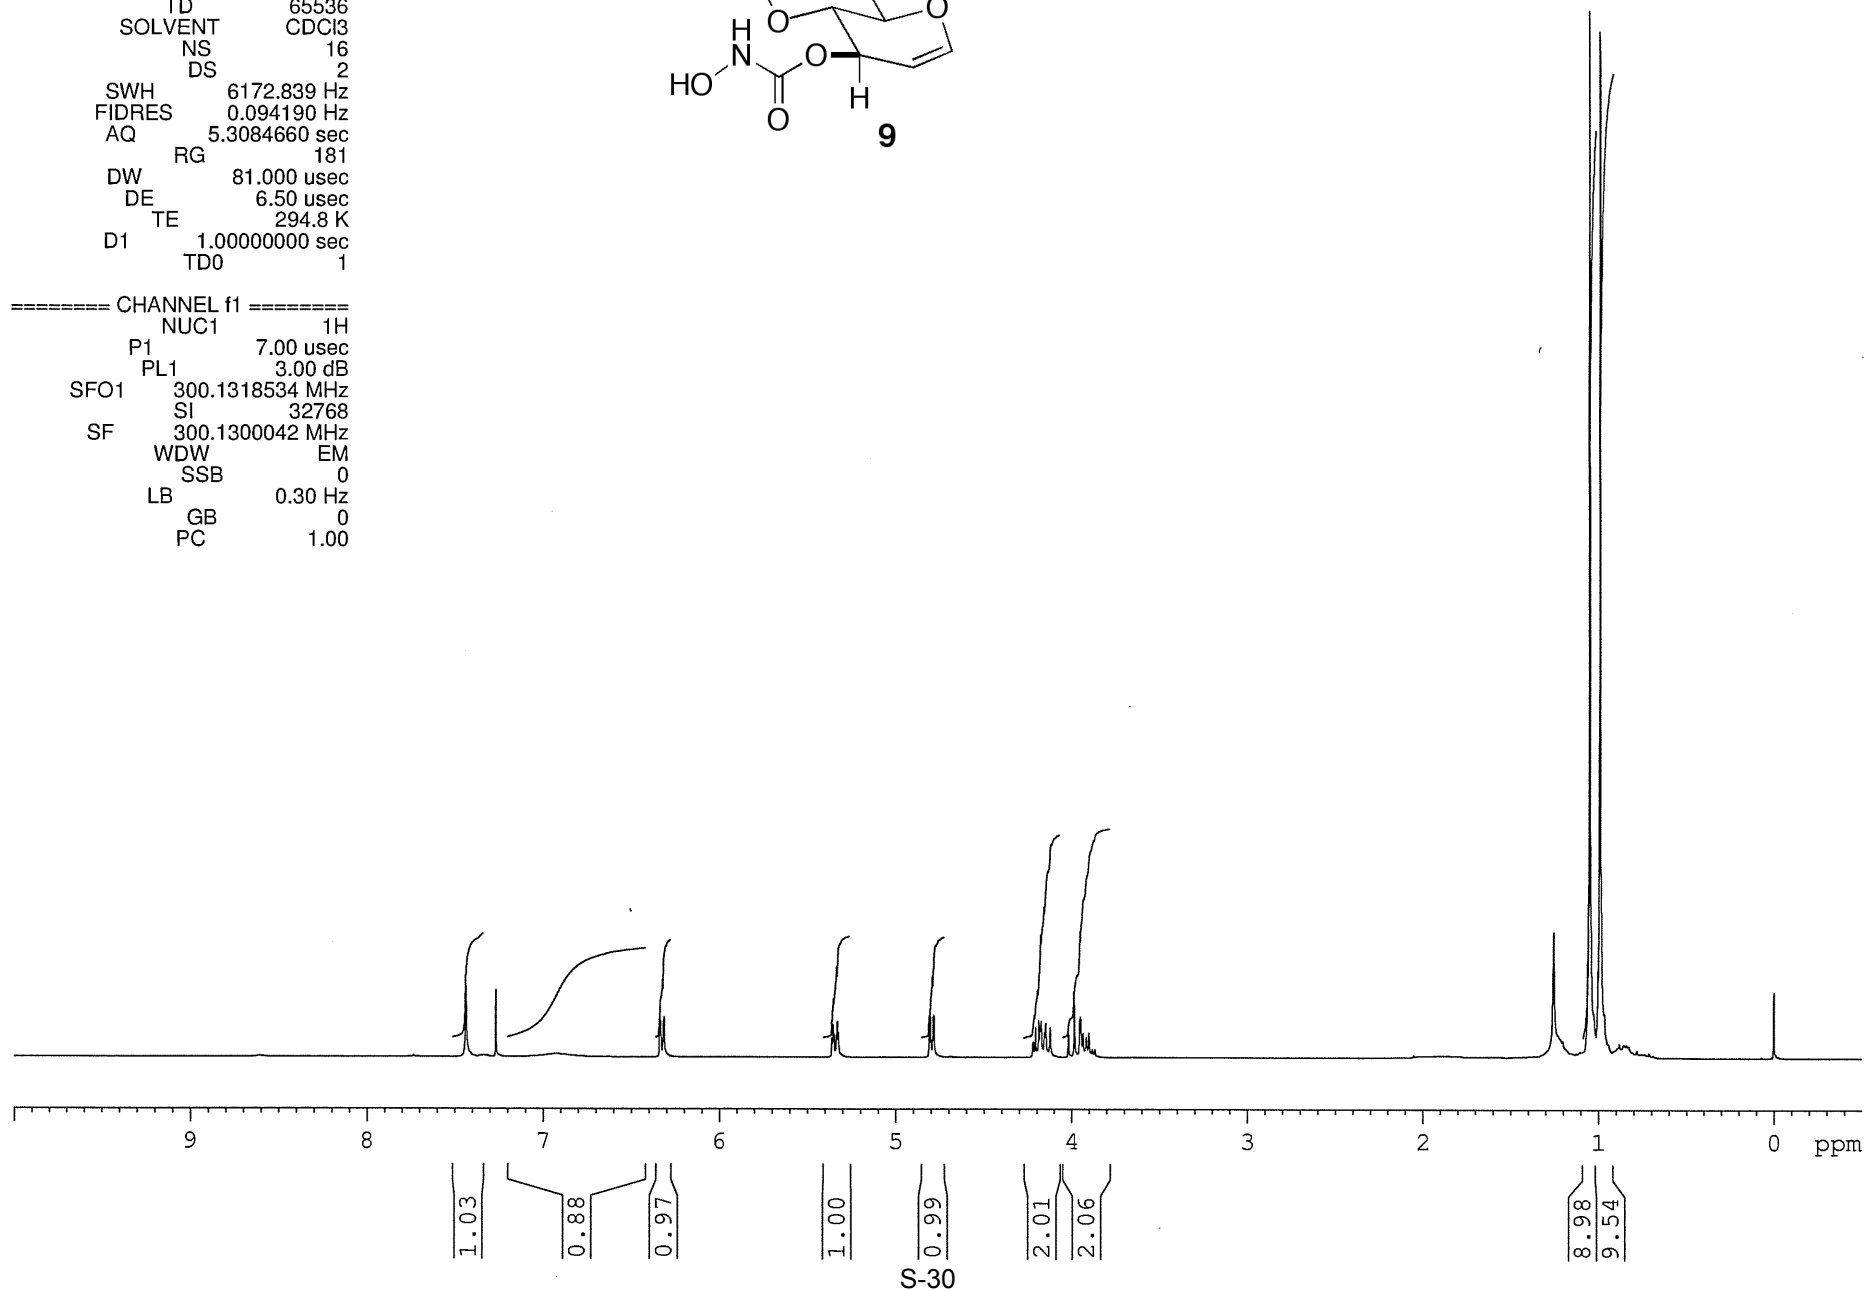

NAME I-BH-/  
 EXPNO 5  
 PROCNO 1  
 Date\_ 20090617  
 Time 14.59  
 INSTRUM spect  
 PROBHD 5 mm BBO BB-1H  
 PULPROG zgpg30  
 TD 65536  
 SOLVENT CDCl3  
 NS 526  
 DS 4  
 SWH 17985.611 Hz  
 FIDRES 0.274439 Hz  
 AQ 1.8219508 sec  
 RG 32768  
 DW 27.800 usec  
 DE 6.00 usec  
 TE 295.2 K  
 D1 2.00000000 sec  
 D11 0.03000000 sec  
 TD0 1

===== CHANNEL f1 =====  
 NUC1 13C  
 P1 10.00 usec  
 PL1 6.00 dB  
 SFO1 75.4752953 MHz

===== CHANNEL f2 =====  
 CPDPRG2 waltz16  
 NUC2 1H  
 PCPD2 77.00 usec  
 PL2 3.00 dB  
 PL12 25.00 dB  
 PL13 25.00 dB  
 SFO2 300.1312005 MHz  
 SI 32768  
 SF 75.4677506 MHz  
 WDW EM  
 SSB 0  
 LB 3.00 Hz  
 GB 0  
 PC 1.40

I-BH-7  
 Carbon (purified)

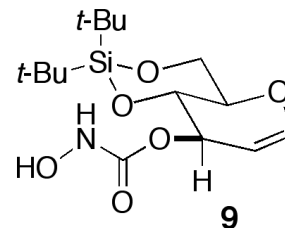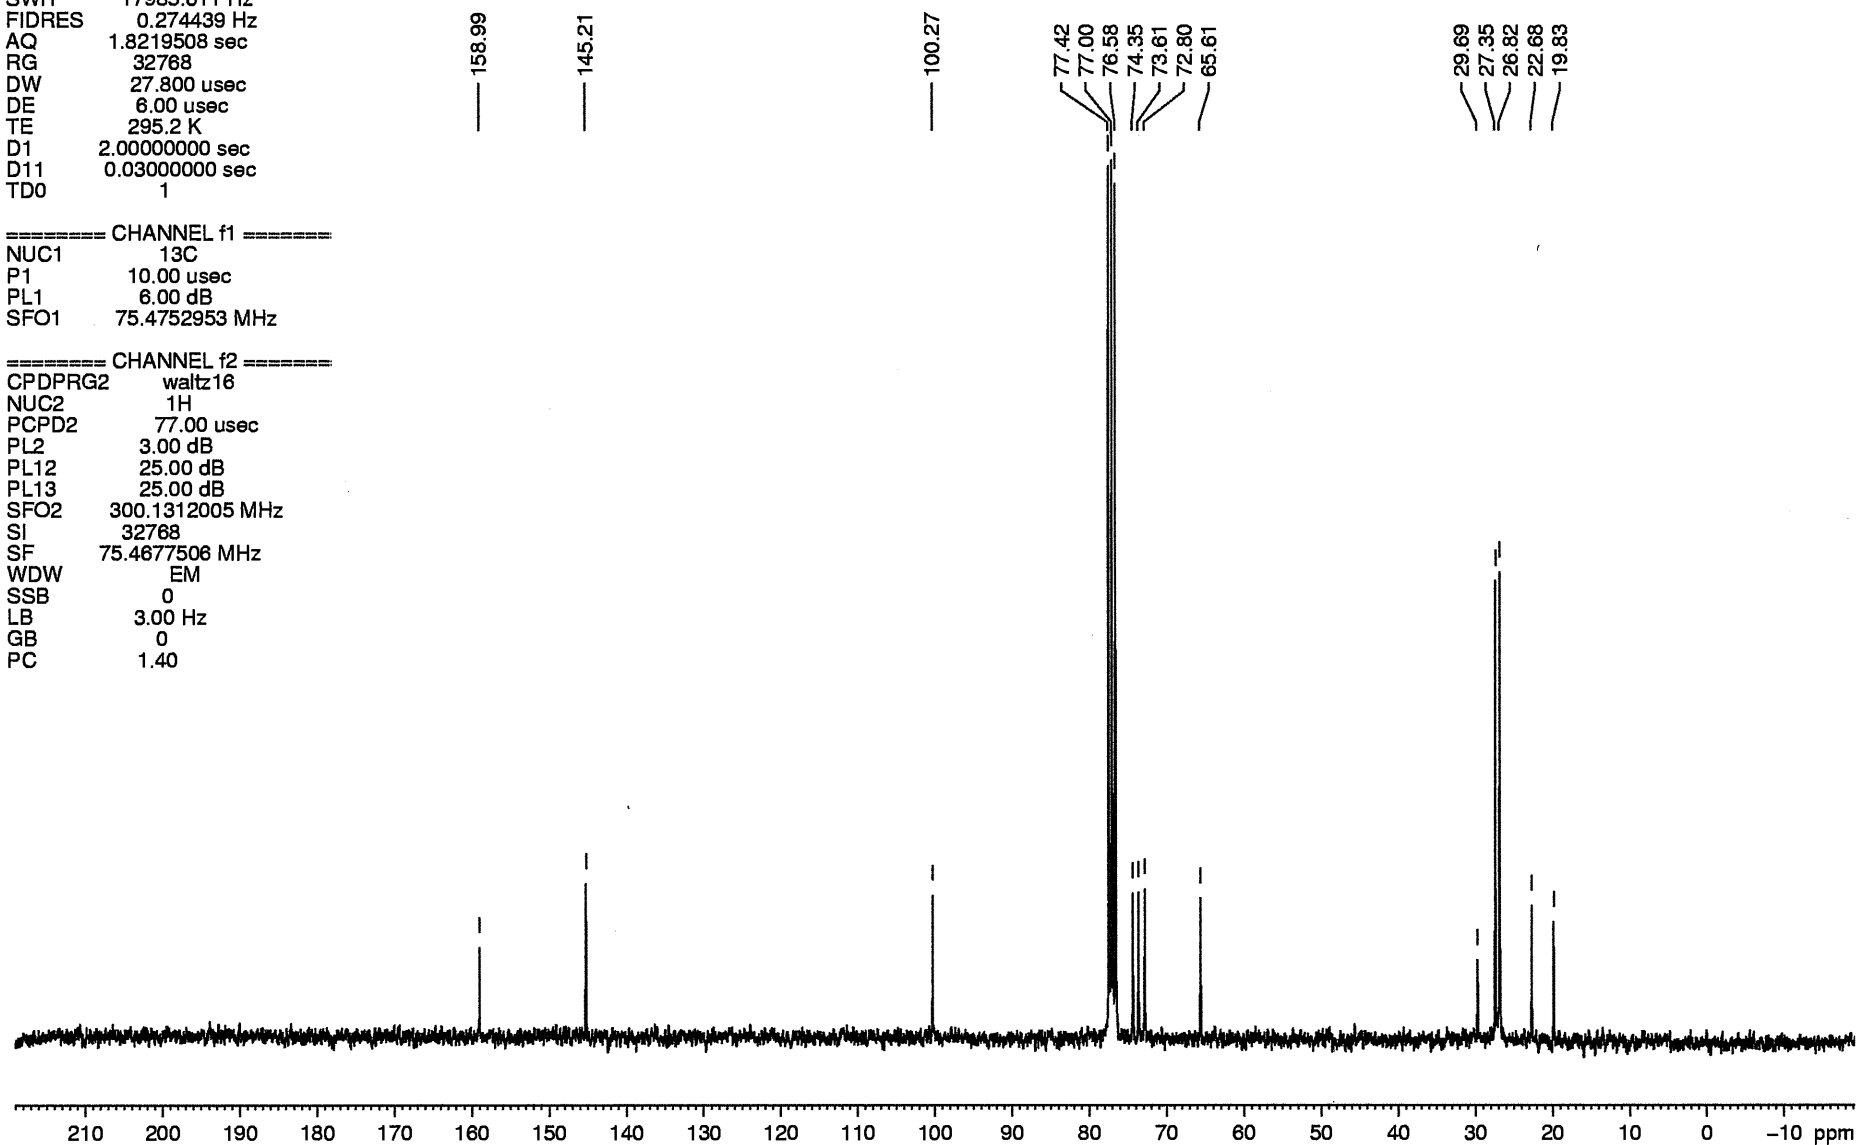

NAME IV-CMR-107  
 EXPNO 1  
 PROCNO 1  
 Date\_ 20100910  
 Time 11.43  
 INSTRUM spect  
 PROBHD 5 mm BBO BB-1H  
 PULPROG zg30  
 TD 65536  
 SOLVENT CD2Cl2  
 NS 4  
 DS 2  
 SWH 6172.839 Hz  
 FIDRES 0.094190 Hz  
 AQ 5.3084660 sec  
 RG 71.8  
 DW 81.000 usec  
 DE 6.50 usec  
 TE 300.1 K  
 D1 1.00000000 sec  
 TD0 1

IV-CMR-107  
 N-Tosyloxycarbamate in CD<sub>2</sub>Cl<sub>2</sub>

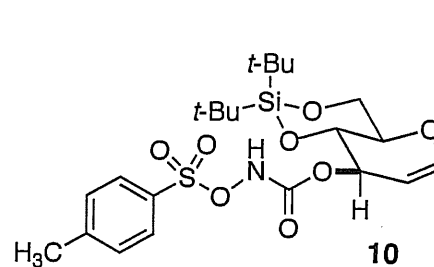

===== CHANNEL f1 =====  
 NUC1 1H  
 P1 6.90 usec  
 PL1 3.00 dB  
 SFO1 300.1318534 MHz  
 SI 32768  
 SF 300.1300103 MHz  
 WDW EM  
 SSB 0  
 LB 0.30 Hz  
 GB 0  
 PC 1.00

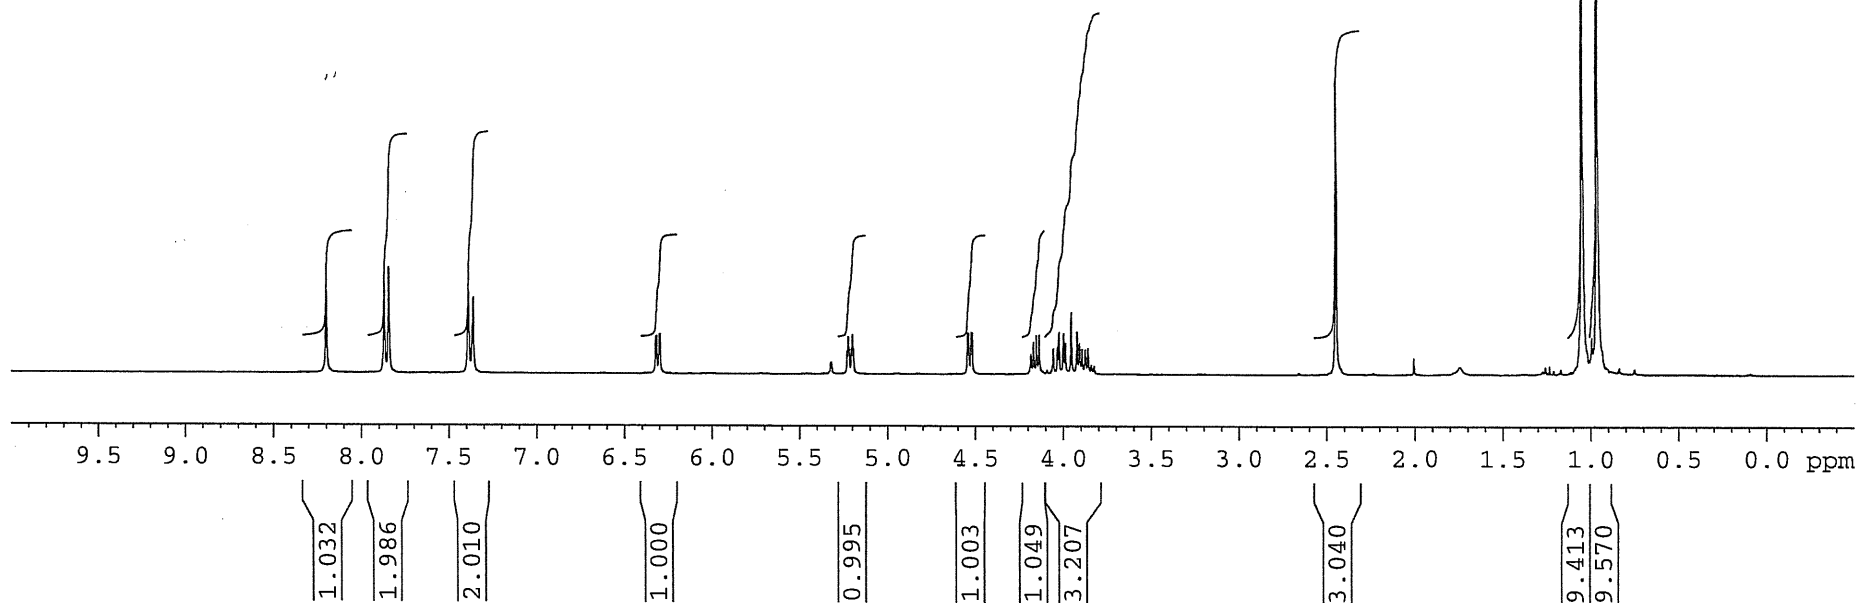



NAME IV-CMR-107  
 EXPNO 2  
 PROCNO 1  
 Date\_ 20100910  
 Time 11.48  
 INSTRUM spect  
 PROBHD 5 mm BBO BB-1H  
 PULPROG zgpg30  
 TD 65536  
 SOLVENT CD2Cl2  
 NS 258  
 DS 4  
 SWH 17985.611 Hz  
 FIDRES 0.274439 Hz  
 AQ 1.8219508 sec  
 RG 32768  
 DW 27.800 usec  
 DE 6.00 usec  
 TE 300.2 K  
 D1 2.00000000 sec  
 D11 0.03000000 sec  
 TD0 1

IV-CMR-107  
 N-Tosyloxycarbamate in CD2Cl2  
 13C NMR

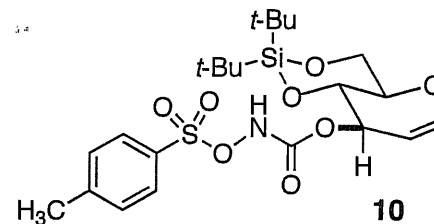

===== CHANNEL f1 =====  
 NUC1 13C  
 P1 10.00 usec  
 PL1 6.00 dB  
 SFO1 75.4752953 MHz

===== CHANNEL f2 =====  
 CPDPRG2 waltz16  
 NUC2 1H  
 PCPD2 68.00 usec  
 PL2 3.00 dB  
 PL12 24.00 dB  
 PL13 24.00 dB  
 SFO2 300.1312005 MHz  
 SI 32768  
 SF 75.4677034 MHz  
 WDW EM  
 SSB 0  
 LB 3.00 Hz  
 GB 0  
 PC 1.40

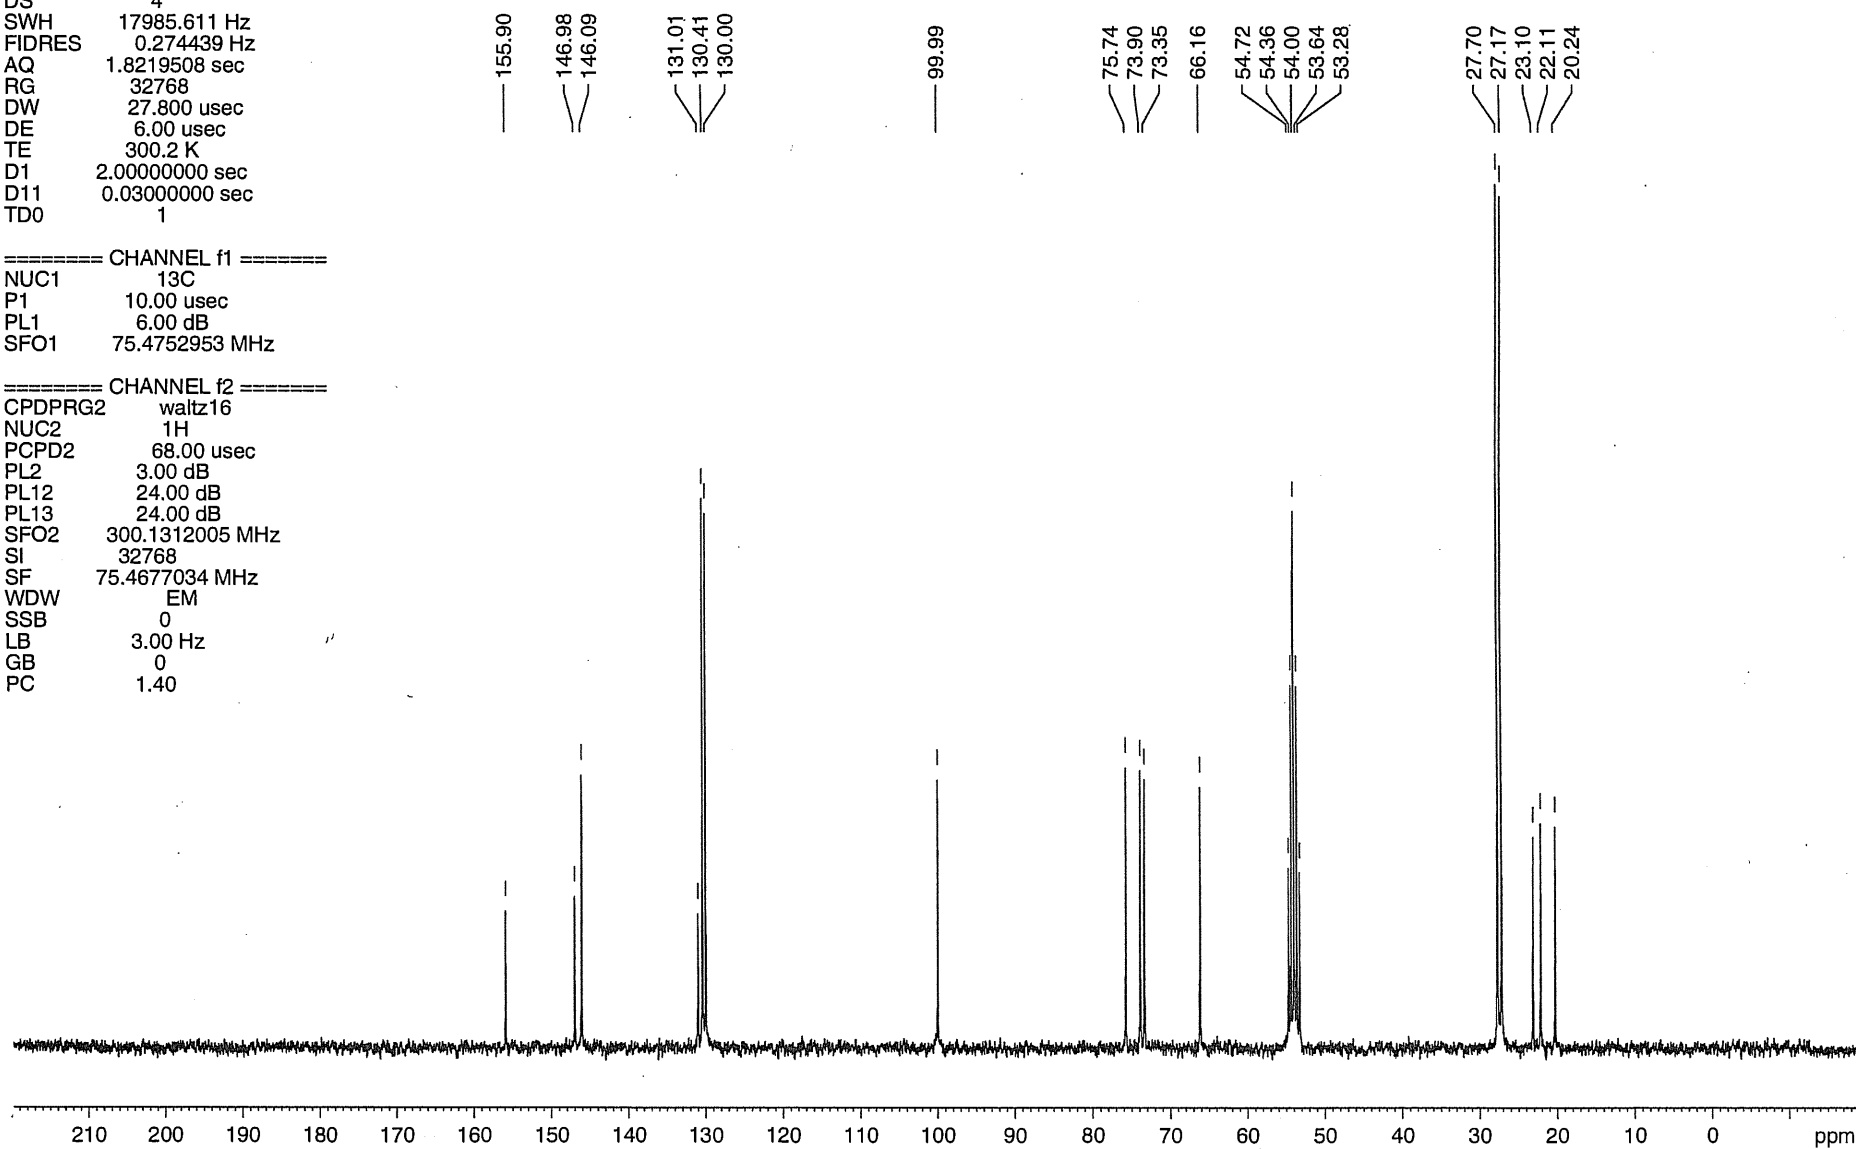

NAME IV-CMR-151  
 EXPNO 1  
 PROCNO 1  
 Date\_ 20101118  
 Time 6.39  
 INSTRUM spect  
 PROBHD 5 mm BBO BB-1H  
 PULPROG zg30  
 TD 65536  
 SOLVENT CDCl3  
 NS 16  
 DS 2  
 SWH 6172.839 Hz  
 FIDRES 0.094190 Hz  
 AQ 5.3084660 sec  
 RG 128  
 DW 81.000 usec  
 DE 6.50 usec  
 TE 300.2 K  
 D1 1.00000000 sec  
 TD0 1

IV-CMR-151  
 F22-23

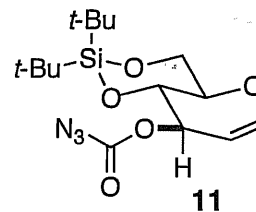

===== CHANNEL f1 =====  
 NUC1 1H  
 P1 6.90 usec  
 PL1 3.00 dB  
 SFO1 300.1318534 MHz  
 SI 32768  
 SF 300.1300051 MHz  
 WDW EM  
 SSB 0  
 LB 0.30 Hz  
 GB 0  
 PC 1.00

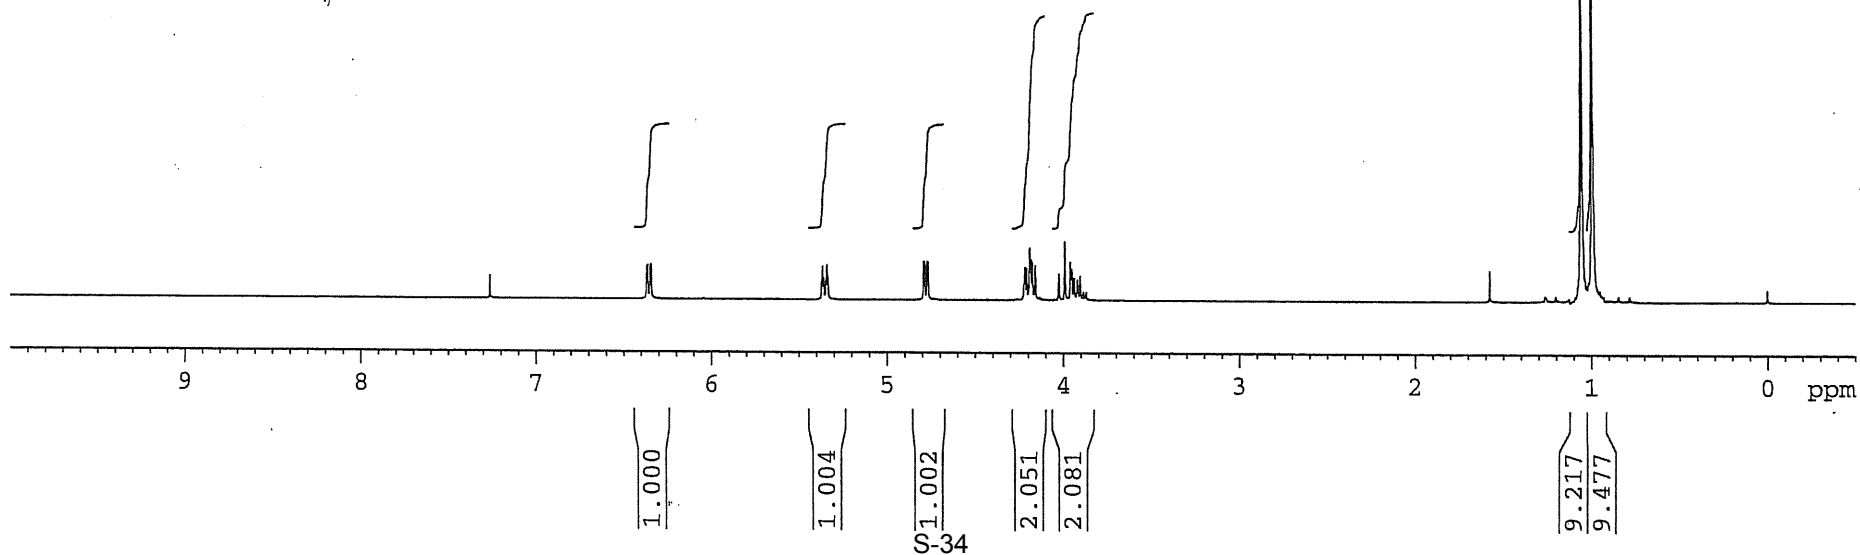

NAME IV-CMR-151  
 EXPNO 2  
 PROCNO 1  
 Date\_ 20101118  
 Time\_ 6.51  
 INSTRUM spect  
 PROBHD 5 mm BBO BB-1H  
 PULPROG zgpg30  
 TD 65536  
 SOLVENT CDCl3  
 NS 530  
 DS 4  
 SWH 17985.611 Hz  
 FIDRES 0.274439 Hz  
 AQ 1.8219508 sec  
 RG 32768  
 DW 27.800 usec  
 DE 6.00 usec  
 TE 300.2 K  
 D1 2.00000000 sec  
 D11 0.03000000 sec  
 TD0 1

IV-CMR-151  
F22-23

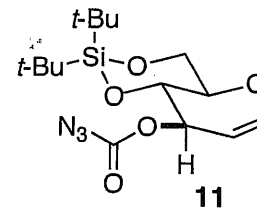

===== CHANNEL f1 =====  
 NUC1 13C  
 P1 10.00 usec  
 PL1 6.00 dB  
 SFO1 75.4752953 MHz

===== CHANNEL f2 =====  
 CPDPRG2 waltz16  
 NUC2 1H  
 PCPD2 68.00 usec  
 PL2 3.00 dB  
 PL12 24.00 dB  
 PL13 24.00 dB  
 SFO2 300.1312005 MHz  
 SI 32768  
 SF 75.4677492 MHz  
 WDW EM  
 SSB 0  
 LB 3.00 Hz  
 GB 0  
 PC 1.40

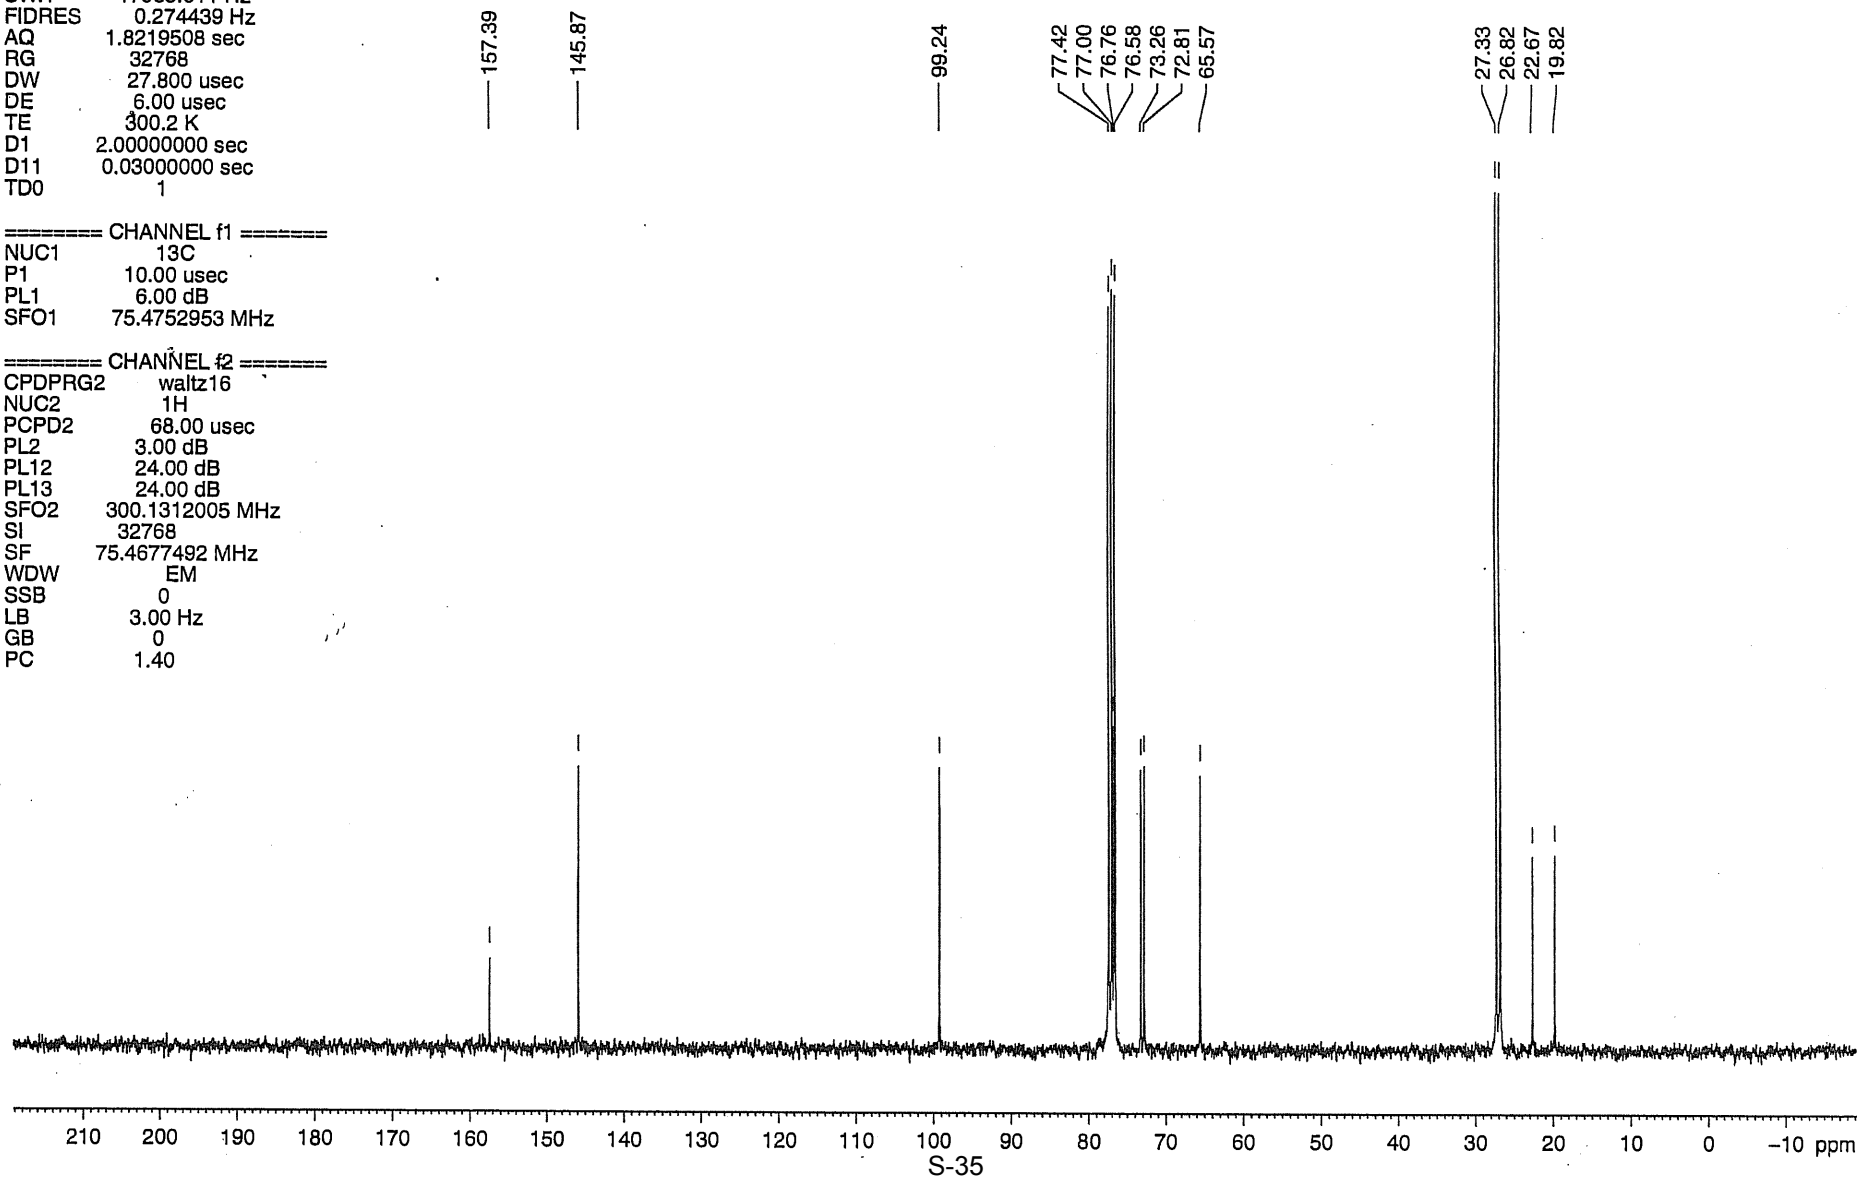

NAME I-BH-5  
EXPNO 1  
PROCNO 1  
Date\_ 20090612  
Time 19.20  
INSTRUM spect  
PROBHD 5 mm BBO BB-1H  
PULPROG zg30  
TD 65536  
SOLVENT CDCl3  
NS 16  
DS 2  
SWH 6172.839 Hz  
FIDRES 0.094190 Hz  
AQ 5.3084660 sec  
RG 574.7  
DW 81.000 usec  
DE 6.50 usec  
TE 673.2 K  
D1 1.00000000 sec  
TD0 1

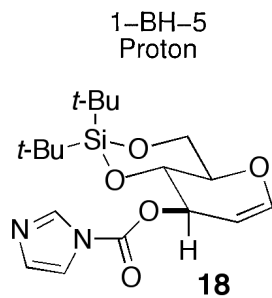

===== CHANNEL f1 =====  
NUC1 1H  
P1 7.00 usec  
PL1 3.00 dB  
SFO1 300.1318534 MHz  
SI 32768  
SF 300.1300048 MHz  
WDW EM  
SSB 0  
LB 0.30 Hz  
GB 0  
PC 1.00

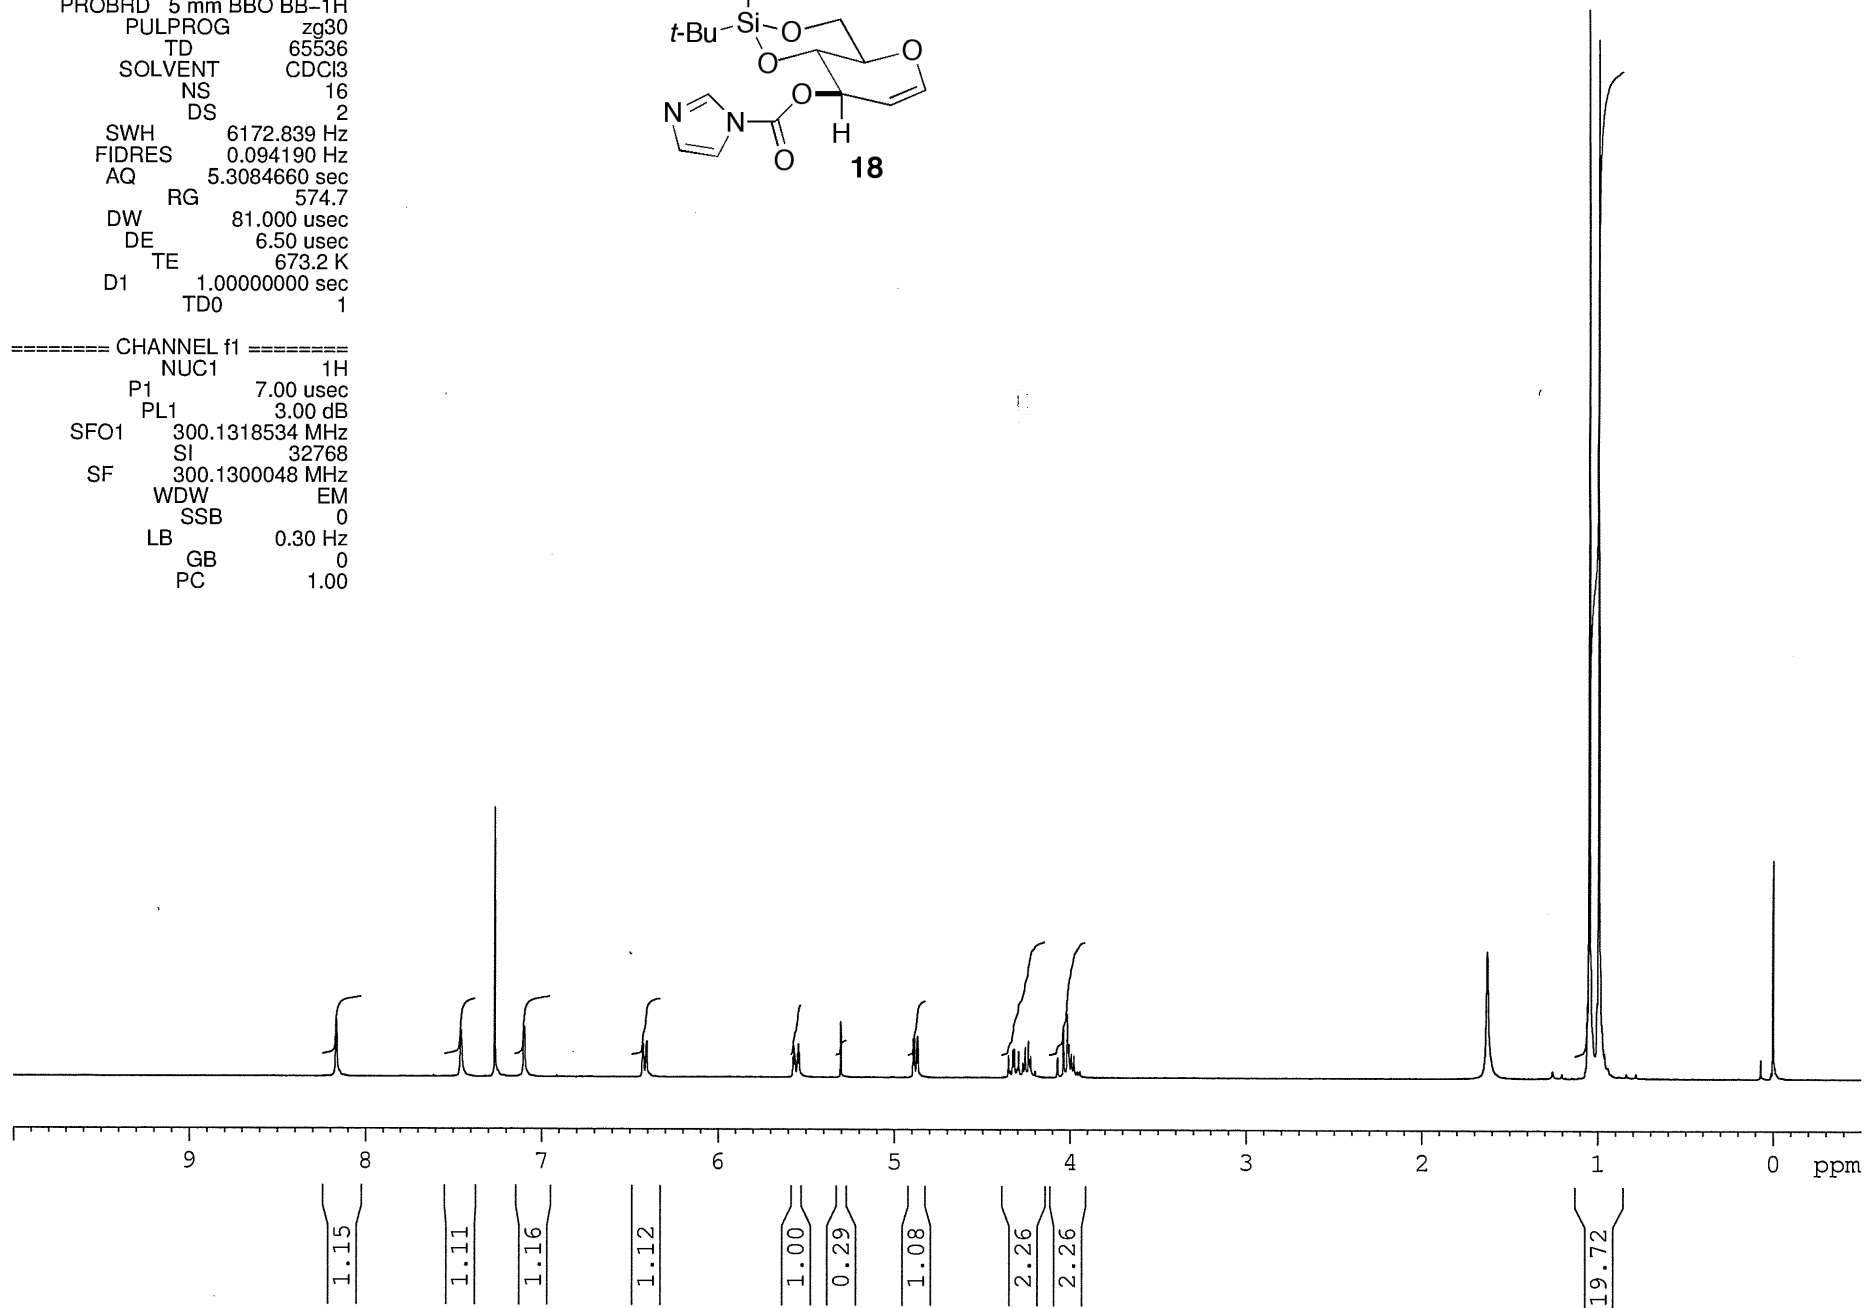

NAME II-CMR-255  
 EXPNO 1  
 PROCNO 3  
 Date\_ 20030411  
 Time 14.11  
 INSTRUM spect  
 PROBHD 5 mm BBO BB-1H  
 PULPROG zg30  
 TD 65536  
 SOLVENT CDCl3  
 NS 16  
 DS 2  
 SWH 6172.839 Hz  
 FIDRES 0.094190 Hz  
 AQ 5.3084660 sec  
 RG 287.4  
 DW 81.000 usec  
 DE 6.00 usec  
 TE 300.0 K  
 D1 1.00000000 sec

II-CMR-255  
 Crude in CDCl3

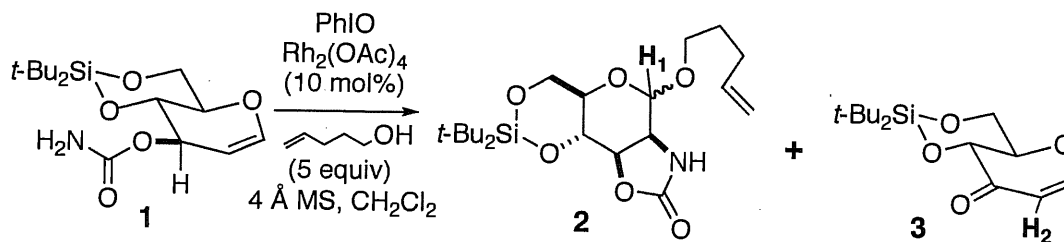

Crude reaction mixture; one of five runs

==== CHANNEL f1 =====  
 NUC1 1H  
 P1 13.10 usec  
 PL1 3.00 dB  
 SFO1 300.1318534 MHz  
 SI 32768  
 SF 300.1300035 MHz  
 WDW EM  
 SSB 0  
 LB 0.30 Hz  
 GB 0  
 PC 1.00

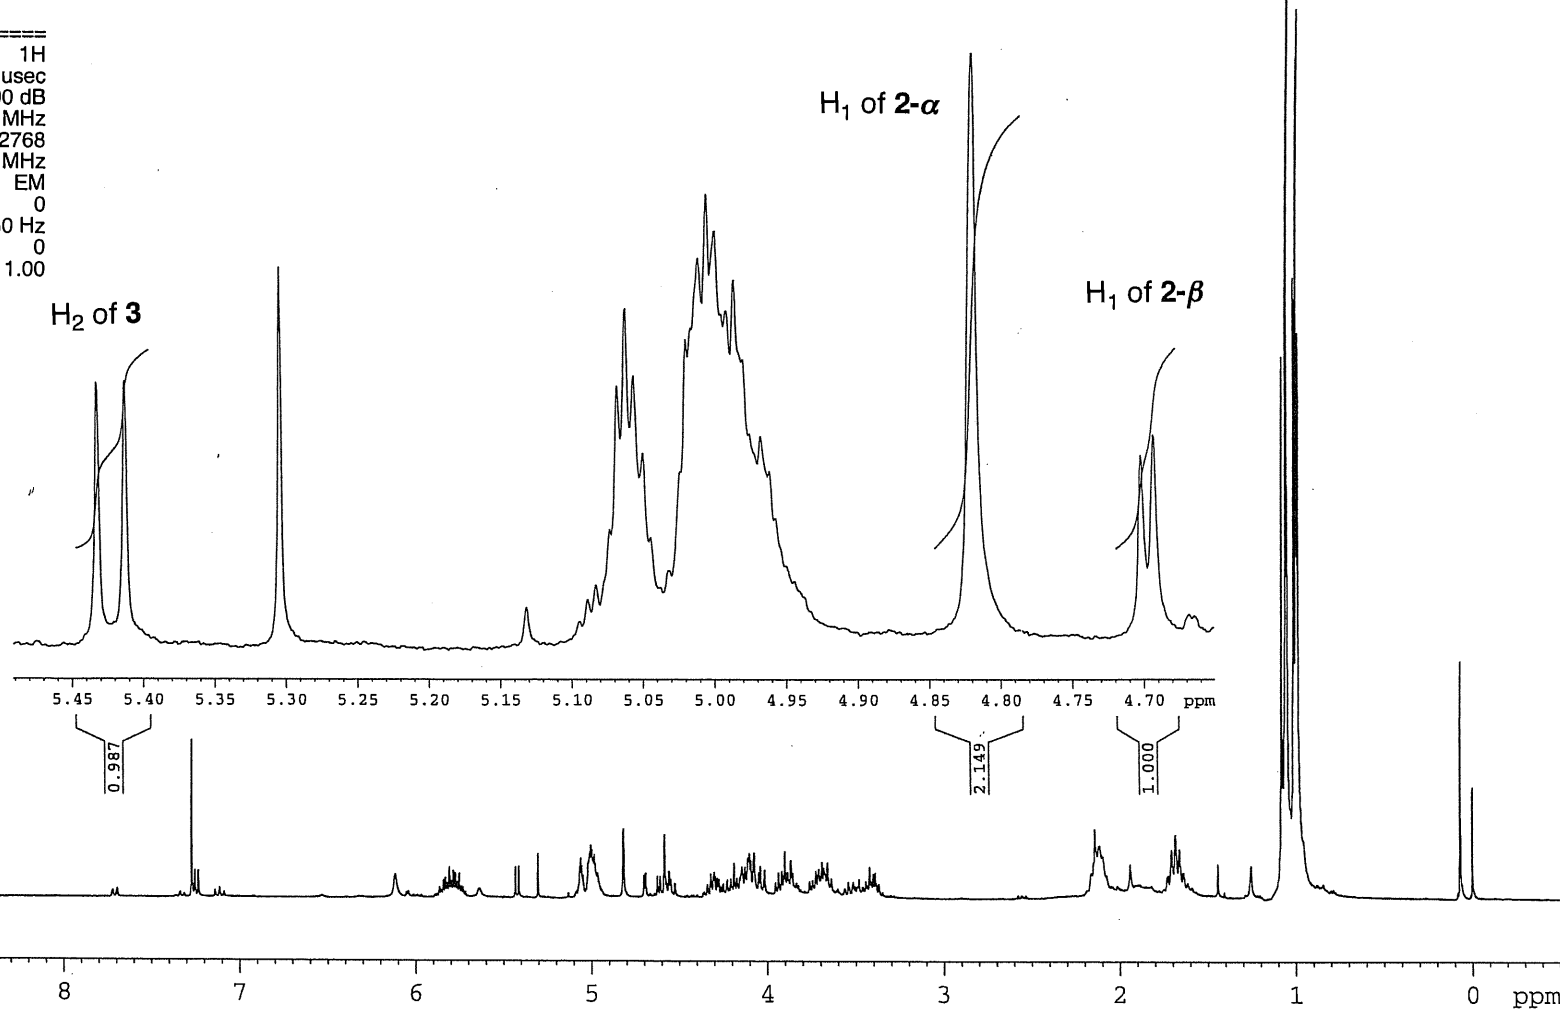

NAME IV-CMR-71  
 EXPNO 1  
 PROCNO 2  
 Date\_ 20100623  
 Time 12.30  
 INSTRUM spect  
 PROBHD 5 mm BBO BB-1H  
 PULPROG zg30  
 TD 65536  
 SOLVENT CDCl3  
 NS 64  
 DS 2  
 SWH 6172.839 Hz  
 FIDRES 0.094190 Hz  
 AQ 5.3084660 sec  
 RG 362  
 DW 81.000 usec  
 DE 6.50 usec  
 TE 300.2 K  
 D1 1.00000000 sec  
 TD0 1

IV-CMR-71  
 Crude in CDCl3

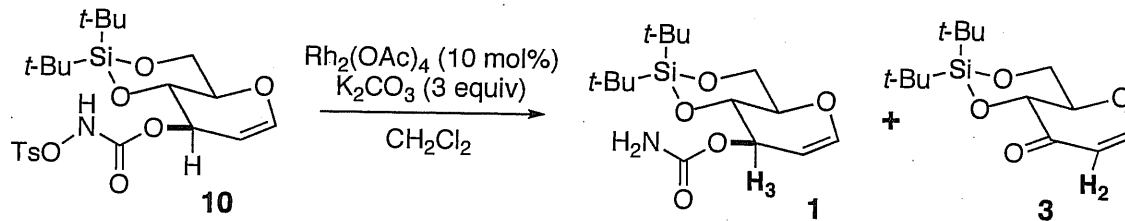

Crude reaction mixture; one of three runs

===== CHANNEL f1 =====  
 NUC1 1H  
 P1 6.90 usec  
 PL1 3.00 dB  
 SFO1 300.1318534 MHz  
 SI 32768  
 SF 300.1300054 MHz  
 WDW EM  
 SSB 0  
 LB 0.30 Hz  
 GB 0  
 PC 1.00

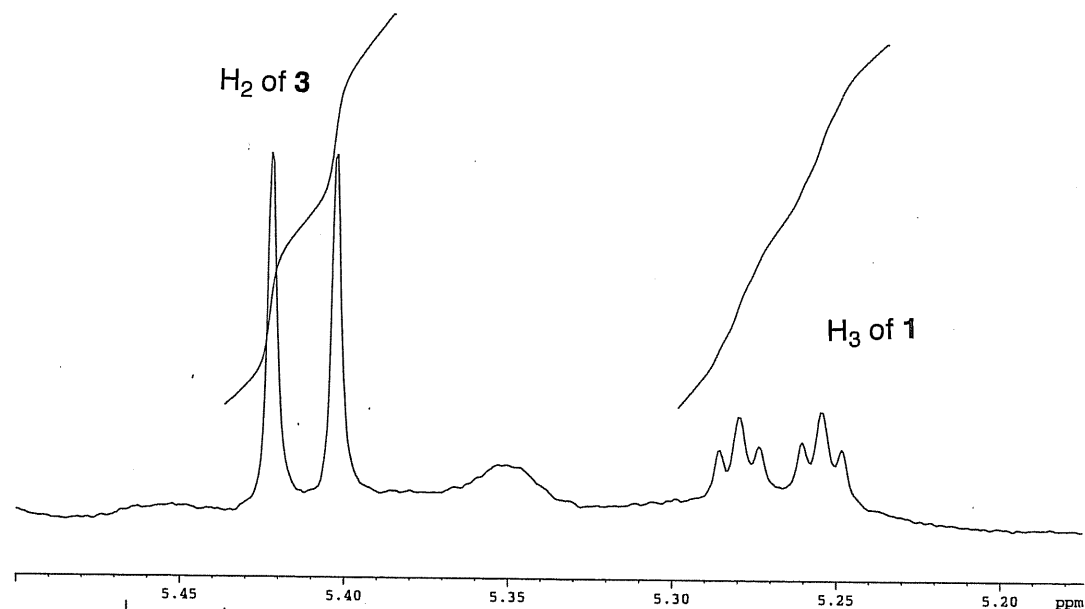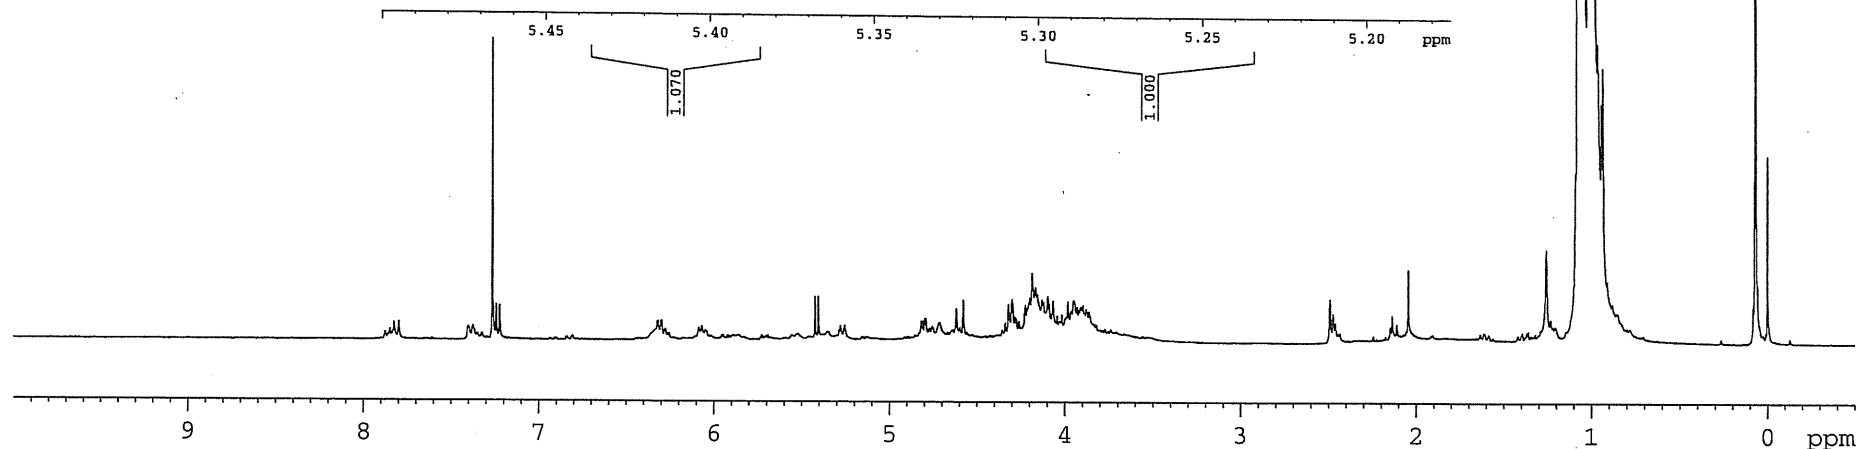

NAME IV-CMR-67  
 EXPNO 2  
 PROCNO 1  
 Date 20100623  
 Time 9.37  
 INSTRUM spect  
 PROBHD 5 mm BBO BB-1H  
 PULPROG zg30  
 TD 65536  
 SOLVENT Acetone  
 NS 64  
 DS 2  
 SWH 6172.839 Hz  
 FIDRES 0.094190 Hz  
 AQ 5.3084660 sec  
 RG 228.1  
 DW 81.000 usec  
 DE 6.50 usec  
 TE 300.1 K  
 D1 1.00000000 sec  
 TD0 1

IV-CMR-67  
 Crude in Acetone-d6

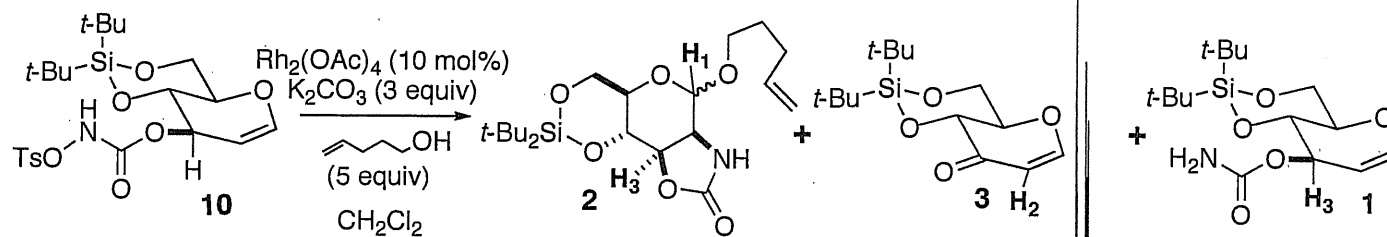

Crude reaction mixture; one of three runs

===== CHANNEL f1 =====  
 NUC1 1H  
 P1 6.90 usec  
 PL1 3.00 dB  
 SFO1 300.1318534 MHz  
 SI 32768  
 SF 300.1300032 MHz  
 WDW EM  
 SSB 0  
 LB 0.30 Hz  
 GB 0  
 PC 1.00

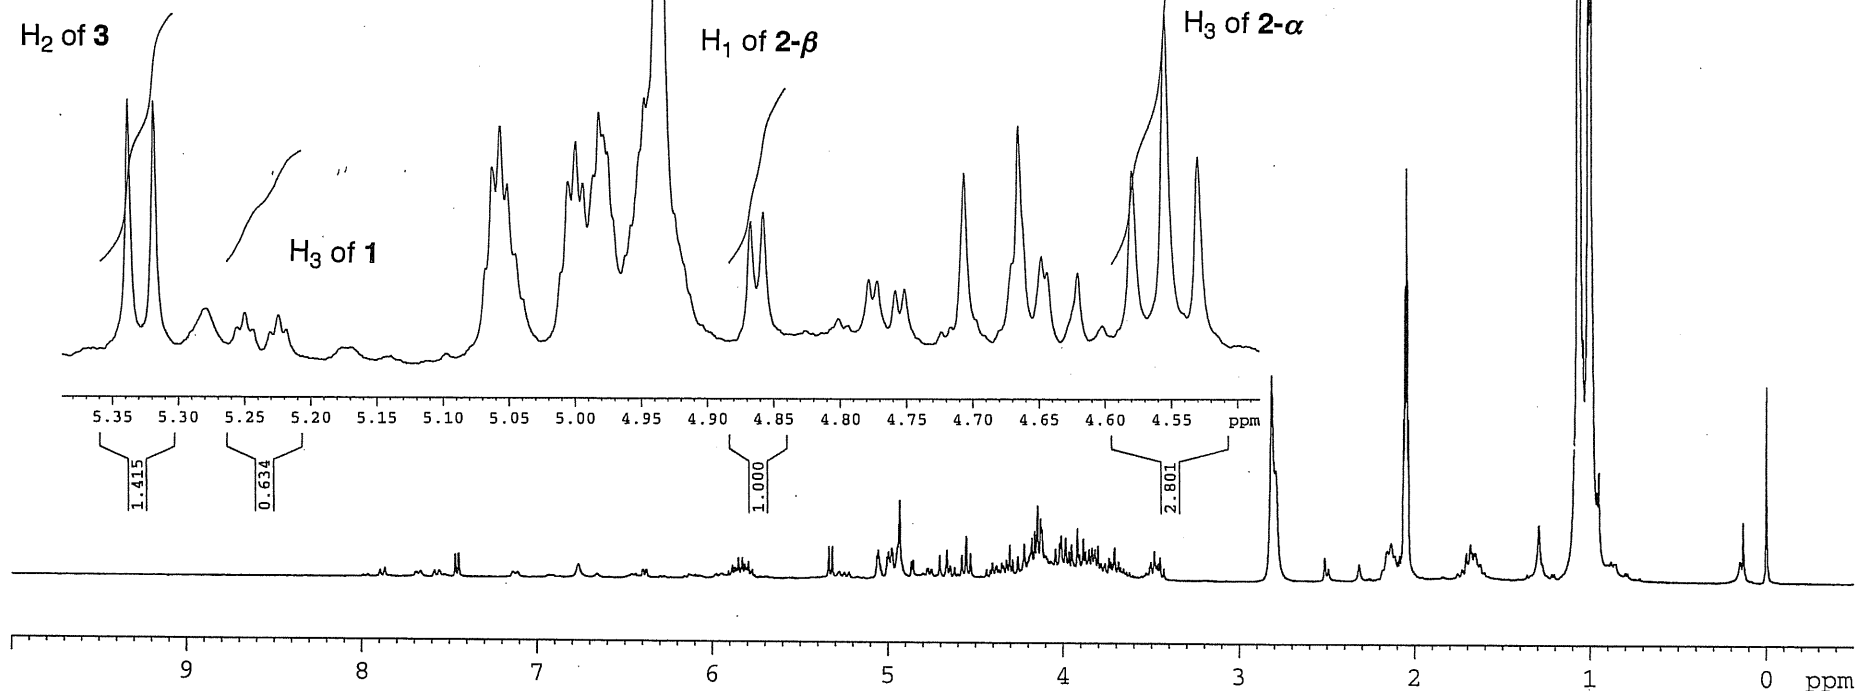

Supplement: Supplementary file 1 [file 4335799]
